# Supplementary material
Source: Research Square preprint supplement (doi:10.21203/rs.3.rs-9321668/v1)
Supplement: Supplementary file 1 [file 6676fb50dc7e627d7f9d0025.xlsx]

## Sheet: original data files for qPCR
Figure 1B,1C(Relative expression of circCOPA in 80 HCC samples)		Sample Name	Target Name	Cт	Sample Name	Target Name	Cт	Sample Name	Target Name	Cт	Sample Name	Target Name	Cт	Sample Name	Target Name	Cт	Sample Name	Target Name	Cт	Sample Name	Target Name	Cт	Sample Name	Target Name	Cт	Sample Name	Target Name
		T1	circ	33.5110855102539	T11	circ	38.1703147888184	T21	circ1	34.3573684692383	T31	circ1	33.743408203125	T41	circ1	33.743408203125	T51	circ1	34.9009284973145	T51	circ1	34.9009284973145	T61	circ1	34.4331398010254	T71	circ1	35.1833953857422
		T1	circ	32.4228401184082	T11	circ	Undetermined	T21	circ1	36.728458404541	T31	circ1	33.0347213745117	T41	circ1	33.0347213745117	T51	circ1	35.4132118225098	T51	circ1	35.4132118225098	T61	circ1	36.9663009643555	T71	circ1	Undetermined
		T1	circ	32.2308311462402	T11	circ	38.0722618103027	T21	circ1	Undetermined	T31	circ1	34.7675971984863	T41	circ1	34.7675971984863	T51	circ1	33.1590728759766	T51	circ1	33.1590728759766	T61	circ1	34.6948051452637	T71	circ1	36.675163269043
		T1	gadp	22.1974868774414	T11	gadp	25.0788879394531	T21	gad1	25.4059410095215	T31	gad1	21.982048034668	T41	gad1	21.982048034668	T51	gad1	23.8632030487061	T51	gad1	23.8632030487061	T61	gad1	22.1335849761963	T71	gad1	28.4943981170654
		T1	gadp	21.6621780395508	T11	gadp	24.9289054870605	T21	gad1	25.4778995513916	T31	gad1	21.744119644165	T41	gad1	21.744119644165	T51	gad1	22.0763206481934	T51	gad1	22.0763206481934	T61	gad1	22.1175689697266	T71	gad1	28.4745941162109
		T1	gadp	21.8751850128174	T11	gadp	24.8810691833496	T21	gad1	25.4160575866699	T31	gad1	21.9438400268555	T41	gad1	21.9438400268555	T51	gad1	22.001293182373	T51	gad1	22.001293182373	T61	gad1	22.2178840637207	T71	gad1	28.5333518981934
		P1	circ	31.8475036621094	P11	circ	33.0722618103027	P21	circ1	36.0815200805664	P31	circ1	34.3504676818848	P41	circ1	34.3504676818848	P51	circ1	34.4331398010254	P51	circ1	34.4331398010254	P61	circ1	33.9667510986328	P71	circ1	35.3152275085449
		P1	circ	36.8847160339355	P11	circ	Undetermined	P21	circ1	36.6231956481934	P31	circ1	Undetermined	P41	circ1	Undetermined	P51	circ1	36.9663009643555	P51	circ1	36.9663009643555	P61	circ1	35.4656600952148	P71	circ1	35.2042808532715
		P1	circ	34.6797294616699	P11	circ	31.9722618103027	P21	circ1	35.3157768249512	P31	circ1	35.4315147399902	P41	circ1	35.4315147399902	P51	circ1	34.6948051452637	P51	circ1	34.6948051452637	P61	circ1	34.9710807800293	P71	circ1	35.9556045532227
		P1	gadp	25.3366565704346	P11	gadp	25.1905174255371	P21	gad1	25.1649322509766	P31	gad1	25.0534934997559	P41	gad1	25.0534934997559	P51	gad1	22.1335849761963	P51	gad1	22.1335849761963	P61	gad1	25.1239719390869	P71	gad1	Undetermined
		P1	gadp	25.4255180358887	P11	gadp	25.2128639221191	P21	gad1	25.1226234436035	P31	gad1	25.0645484924316	P41	gad1	25.0645484924316	P51	gad1	22.1175689697266	P51	gad1	22.1175689697266	P61	gad1	25.3255481719971	P71	gad1	34.7996387481689
		P1	gadp	25.2526607513428	P11	gadp	25.1083374023438	P21	gad1	25.1764144897461	P31	gad1	24.9276924133301	P41	gad1	24.9276924133301	P51	gad1	22.2178840637207	P51	gad1	22.2178840637207	P61	gad1	25.4484329223633	P71	gad1	34.1121139526367
		T2	circ	35.4725112915039	T12	circ	31.7362632751465	P22	circ1	32.4593048095703	P32	circ1	33.0936317443848	P42	circ1	33.0936317443848	P52	circ1	33.9667510986328	P52	circ1	33.9667510986328	P62	circ1	35.5977478027344	P72	circ1	Undetermined
		T2	circ	35.0844192504883	T12	circ	32.0818367004395	P22	circ1	32.2322692871094	P32	circ1	33.2919425964355	P42	circ1	33.2919425964355	P52	circ1	35.4656600952148	P52	circ1	35.4656600952148	P62	circ1	36.8995170593262	P72	circ1	Undetermined
		T2	circ	33.3894348144531	T12	circ	31.0290260314941	P22	circ1	32.2881736755371	P32	circ1	34.0839538574219	P42	circ1	34.0839538574219	P52	circ1	34.9710807800293	P52	circ1	34.9710807800293	P62	circ1	36.7164878845215	P72	circ1	Undetermined
		T2	gadp	23.2330150604248	T12	gadp	19.3184356689453	P22	gad1	18.7406806945801	P32	gad1	22.9816627502441	P42	gad1	22.9816627502441	P52	gad1	25.1239719390869	P52	gad1	25.1239719390869	P62	gad1	25.2867584228516	P72	gad1	22.958683013916
		T2	gadp	23.3444976806641	T12	gadp	19.2478313446045	P22	gad1	18.8115234375	P32	gad1	23.0453968048096	P42	gad1	23.0453968048096	P52	gad1	25.3255481719971	P52	gad1	25.3255481719971	P62	gad1	25.3223743438721	P72	gad1	23.0952816009521
		T2	gadp	23.2409057617188	T12	gadp	19.2945652008057	P22	gad1	18.7389812469482	P32	gad1	22.8040447235107	P42	gad1	22.8040447235107	P52	gad1	25.4484329223633	P52	gad1	25.4484329223633	P62	gad1	25.299934387207	P72	gad1	23.0611476898193
		P2	circ	33.4792022705078	P12	circ	34.7098541259766	T22	circ1	35.6094436645508	T32	circ1	35.9726371765137	T42	circ1	35.9726371765137	T52	circ1	35.5977478027344	T52	circ1	35.5977478027344	T62	circ1	35.5977478027344	T72	circ1	Undetermined
		P2	circ	34.3062744140625	P12	circ	34.5318984985352	T22	circ1	35.7644996643066	T32	circ1	Undetermined	T42	circ1	Undetermined	T52	circ1	36.8995170593262	T52	circ1	36.8995170593262	T62	circ1	35.8995170593261	T72	circ1	Undetermined
		P2	circ	Undetermined	P12	circ	Undetermined	T22	circ1	34.5332527160645	T32	circ1	35.6211242675781	T42	circ1	35.6211242675781	T52	circ1	36.7164878845215	T52	circ1	36.7164878845215	T62	circ1	35.7164878845214	T72	circ1	Undetermined
		P2	gadp	26.3058528900146	P12	gadp	25.4512920379639	T22	gad1	25.5512180328369	T32	gad1	25.2341117858887	T42	gad1	25.2341117858887	T52	gad1	25.2867584228516	T52	gad1	25.2867584228516	T62	gad1	24.4777965545654	T72	gad1	35.0698280334473
		P2	gadp	26.3139190673828	P12	gadp	25.4783935546875	T22	gad1	25.5524635314941	T32	gad1	25.3121013641357	T42	gad1	25.3121013641357	T52	gad1	25.3223743438721	T52	gad1	25.3223743438721	T62	gad1	24.6139831542969	T72	gad1	34.5415420532227
		P2	gadp	26.0785827636719	P12	gadp	25.5132293701172	T22	gad1	25.6591300964355	T32	gad1	25.2058658599854	T42	gad1	25.2058658599854	T52	gad1	25.299934387207	T52	gad1	25.299934387207	T62	gad1	24.4264335632324	T72	gad1	35.1483001708984
		T3	circ	34.1703147888184	T13	circ	33.3283004760742	T23	circ2	33.848575592041	T33	circ2	34.3573684692383	T43	circ2	34.3573684692383	T53	circ2	35.5977478027344	T53	circ2	35.5977478027344	T63	circ2	33.9667510986328	T73	circ2	36.4907379150391
		T3	circ	34.3703147888184	T13	circ	32.5303497314453	T23	circ2	33.148575592041	T33	circ2	36.728458404541	T43	circ2	36.728458404541	T53	circ2	35.8995170593261	T53	circ2	35.8995170593261	T63	circ2	35.4656600952148	T73	circ2	37.2002029418945
		T3	circ	34.0722618103027	T13	circ	32.9322662353516	T23	circ2	32.848575592041	T33	circ2	Undetermined	T43	circ2	Undetermined	T53	circ2	35.7164878845214	T53	circ2	35.7164878845214	T63	circ2	34.9710807800293	T73	circ2	35.6480674743652
		T3	gadp	25.0788879394531	T13	gadp	21.6635284423828	T23	gad2	21.8900012969971	T33	gad2	25.4059410095215	T43	gad2	25.4059410095215	T53	gad2	24.4777965545654	T53	gad2	24.4777965545654	T63	gad2	24.6691989898682	T73	gad2	13.7756366729736
		T3	gadp	24.9289054870605	T13	gadp	21.5600242614746	T23	gad2	21.1900012969971	T33	gad2	25.4778995513916	T43	gad2	25.4778995513916	T53	gad2	24.6139831542969	T53	gad2	24.6139831542969	T63	gad2	24.9462776184082	T73	gad2	13.8121519088745
		T3	gadp	24.8810691833496	T13	gadp	21.7166633605957	T23	gad2	22.8700012969971	T33	gad2	25.4160575866699	T43	gad2	25.4160575866699	T53	gad2	24.4264335632324	T53	gad2	24.4264335632324	T63	gad2	24.9866561889648	T73	gad2	13.7804174423218
		P3	circ	32.1818367004395	P13	circ	34.7634048461914	P23	circ2	34.8909912109375	P33	circ2	36.0815200805664	P43	circ2	36.0815200805664	P53	circ2	33.9667510986328	P53	circ2	33.9667510986328	P63	circ2	35.0332374572754	P73	circ2	33.9258117675781
		P3	circ	32.4018367504395	P13	circ	34.3975448608398	P23	circ2	34.8909912109375	P33	circ2	36.6231956481934	P43	circ2	36.6231956481934	P53	circ2	35.4656600952148	P53	circ2	35.4656600952148	P63	circ2	34.2580986022949	P73	circ2	34.3627662658691
		P3	circ	32.9813367004395	P13	circ	34.4286766052246	P23	circ2	34.8909912109375	P33	circ2	35.3157768249512	P43	circ2	35.3157768249512	P53	circ2	34.9710807800293	P53	circ2	34.9710807800293	P63	circ2	34.5688705444336	P73	circ2	35.4703025817871
		P3	gadp	25.1905174255371	P13	gadp	26.2823944091797	P23	gad2	25.0152435302734	P33	gad2	25.1649322509766	P43	gad2	25.1649322509766	P53	gad2	24.6691989898682	P53	gad2	24.6691989898682	P63	gad2	24.6919956207275	P73	gad2	15.5456562042236
		P3	gadp	25.2128639221191	P13	gadp	24.9899463653564	P23	gad2	25.0152435302734	P33	gad2	25.1226234436035	P43	gad2	25.1226234436035	P53	gad2	24.9462776184082	P53	gad2	24.9462776184082	P63	gad2	24.642822265625	P73	gad2	15.4218912124634
		P3	gadp	25.1083374023438	P13	gadp	24.8030548095703	P23	gad2	25.0152435302734	P33	gad2	25.1764144897461	P43	gad2	25.1764144897461	P53	gad2	24.9866561889648	P53	gad2	24.9866561889648	P63	gad2	24.643180847168	P73	gad2	15.5337057113647
		T4	circ	31.7362632751465	T14	circ	32.9361801147461	T24	circ2	33.4898414611816	T34	circ2	32.4593048095703	T44	circ2	32.4593048095703	T54	circ2	35.0332374572754	T54	circ2	35.0332374572754	T64	circ2	35.3080978393555	T74	circ2	33.9667510986328
		T4	circ	32.0818367004395	T14	circ	33.1986465454102	T24	circ2	33.4898414611816	T34	circ2	32.2322692871094	T44	circ2	32.2322692871094	T54	circ2	34.2580986022949	T54	circ2	34.2580986022949	T64	circ2	35.4680252075195	T74	circ2	35.4656600952148
		T4	circ	31.0290260314941	T14	circ	33.3832511901855	T24	circ2	33.4898414611816	T34	circ2	32.2881736755371	T44	circ2	32.2881736755371	T54	circ2	34.5688705444336	T54	circ2	34.5688705444336	T64	circ2	36.7790145874023	T74	circ2	34.9710807800293
		T4	gadp	19.3184356689453	T14	gadp	19.524772644043	T24	gad2	22.9437007904053	T34	gad2	18.7406806945801	T44	gad2	18.7406806945801	T54	gad2	24.6919956207275	T54	gad2	24.6919956207275	T64	gad2	25.0491218566895	T74	gad2	25.1239719390869
		T4	gadp	19.2478313446045	T14	gadp	18.9680347442627	T24	gad2	22.0437007904053	T34	gad2	18.8115234375	T44	gad2	18.8115234375	T54	gad2	24.642822265625	T54	gad2	24.642822265625	T64	gad2	25.3111877441406	T74	gad2	25.3255481719971
		T4	gadp	19.2945652008057	T14	gadp	19.5504360198975	T24	gad2	22.9437007904053	T34	gad2	18.7389812469482	T44	gad2	18.7389812469482	T54	gad2	24.643180847168	T54	gad2	24.643180847168	T64	gad2	25.3721656799316	T74	gad2	25.4484329223633
		P4	circ	34.7098541259766	P14	circ	34.7969818115234	P24	circ2	35.1968826293945	P34	circ2	35.6094436645508	P44	circ2	35.6094436645508	P54	circ2	35.3080978393555	P54	circ2	35.3080978393555	P64	circ2	34.2322692871094	P74	circ2	35.5977478027344
		P4	circ	34.5318984985352	P14	circ	35.922924041748	P24	circ2	35.7968826293945	P34	circ2	35.7644996643066	P44	circ2	35.7644996643066	P54	circ2	35.4680252075195	P54	circ2	35.4680252075195	P64	circ2	35.7644996643066	P74	circ2	36.8995170593262
		P4	circ	Undetermined	P14	circ	35.3316345214844	P24	circ2	35.7968826293945	P34	circ2	37.5332527160645	P44	circ2	37.5332527160645	P54	circ2	36.7790145874023	P54	circ2	36.7790145874023	P64	circ2	34.5332527160645	P74	circ2	36.7164878845215
		P4	gadp	25.4512920379639	P14	gadp	21.6851863861084	P24	gad2	24.2506923675537	P34	gad2	25.5512180328369	P44	gad2	25.5512180328369	P54	gad2	25.0491218566895	P54	gad2	25.0491218566895	P64	gad2	25.5512180328369	P74	gad2	25.2867584228516
		P4	gadp	25.4783935546875	P14	gadp	21.8098125457764	P24	gad2	25.2506923675537	P34	gad2	25.5524635314941	P44	gad2	25.5524635314941	P54	gad2	25.3111877441406	P54	gad2	25.3111877441406	P64	gad2	25.5524635314941	P74	gad2	25.3223743438721
		P4	gadp	25.5132293701172	P14	gadp	21.7493419647217	P24	gad2	25.2506923675537	P34	gad2	25.6591300964355	P44	gad2	25.6591300964355	P54	gad2	25.3721656799316	P54	gad2	25.3721656799316	P64	gad2	25.6591300964355	P74	gad2	25.299934387207
		T5	circ	33.3283004760742	T15	circ	Undetermined	T25	circ2	35.5429153442383	T35	circ2	33.148575592041	T45	circ2	33.743408203125	T55	circ2	35.1833953857422	T55	circ2	35.1833953857422	T65	circ2	33.848575592041	T75	circ2	35.5977478027344
		T5	circ	32.5303497314453	T15	circ	31.4277572631836	T25	circ2	34.1429153442383	T35	circ2	33.828575592041	T45	circ2	33.0347213745117	T55	circ2	Undetermined	T55	circ2	Undetermined	T65	circ2	33.148575592041	T75	circ2	35.8995170593261
		T5	circ	32.9322662353516	T15	circ	32.4277572631836	T25	circ2	35.5429153442383	T35	circ2	33.848575592041	T45	circ2	34.7675971984863	T55	circ2	36.675163269043	T55	circ2	36.675163269043	T65	circ2	32.848575592041	T75	circ2	35.7164878845214
		T5	gadp	21.6635284423828	T15	gadp	25.4652214050293	T25	gad2	25.1332981109619	T35	gad2	21.8200012969971	T45	gad2	21.982048034668	T55	gad2	28.4943981170654	T55	gad2	28.4943981170654	T65	gad2	21.8900012969971	T75	gad2	24.4777965545654
		T5	gadp	21.5600242614746	T15	gadp	25.447338104248	T25	gad2	25.41232981109619	T35	gad2	21.1000012969971	T45	gad2	21.744119644165	T55	gad2	28.4745941162109	T55	gad2	28.4745941162109	T65	gad2	21.1900012969971	T75	gad2	24.6139831542969
		T5	gadp	21.7166633605957	T15	gadp	25.0326480865479	T25	gad2	25.4332981109619	T35	gad2	21.1900012969971	T45	gad2	21.9438400268555	T55	gad2	28.5333518981934	T55	gad2	28.5333518981934	T65	gad2	22.8700012969971	T75	gad2	24.4264335632324
		P5	circ	34.7634048461914	P15	circ	35.4417572631826	P25	circ2	36.3068321228027	P35	circ2	34.8909912109375	P45	circ2	34.3504676818848	P55	circ2	35.3152275085449	P55	circ2	35.3152275085449	P65	circ2	35.3080978393555	P75	circ2	33.9667510986328
		P5	circ	34.3975448608398	P15	circ	Undetermined	P25	circ2	36.1068321228027	P35	circ2	34.1909912109375	P45	circ2	Undetermined	P55	circ2	35.2042808532715	P55	circ2	35.2042808532715	P65	circ2	35.4680252075195	P75	circ2	35.4656600952148
		P5	circ	34.4286766052246	P15	circ	35.4277572631836	P25	circ2	36.68321228027	P35	circ2	33.8909912109375	P45	circ2	35.4315147399902	P55	circ2	35.9556045532227	P55	circ2	35.9556045532227	P65	circ2	36.7790145874023	P75	circ2	34.9710807800293
		P5	gadp	26.2823944091797	P15	gadp	29.4584636688232	P25	gad2	25.4546573638916	P35	gad2	25.0152435302734	P45	gad2	25.0534934997559	P55	gad2	Undetermined	P55	gad2	Undetermined	P65	gad2	25.0491218566895	P75	gad2	24.6691989898682
		P5	gadp	24.9899463653564	P15	gadp	29.1888198852539	P25	gad2	25.1246573638916	P35	gad2	25.1252435302734	P45	gad2	25.0645484924316	P55	gad2	34.7996387481689	P55	gad2	34.7996387481689	P65	gad2	25.3111877441406	P75	gad2	24.9462776184082
		P5	gadp	24.8030548095703	P15	gadp	29.4568176269531	P25	gad2	25.1546573638916	P35	gad2	25.1152435302734	P45	gad2	24.9276924133301	P55	gad2	34.1121139526367	P55	gad2	34.1121139526367	P65	gad2	25.3721656799316	P75	gad2	24.9866561889648
		T6	circ	32.9361801147461	T16	circ	34.5963859558105	T26	circ2	32.3265838623047	T36	circ2	33.4898414611816	T46	circ2	33.0936317443848	T56	circ2	Undetermined	T56	circ2	Undetermined	T66	circ2	32.4593048095703	T76	circ2	35.0332374572754
		T6	circ	33.1986465454102	T16	circ	35.7017860412598	T26	circ2	32.1265838623047	T36	circ2	33.1898414611816	T46	circ2	33.2919425964355	T56	circ2	Undetermined	T56	circ2	Undetermined	T66	circ2	32.2322692871094	T76	circ2	34.2580986022949
		T6	circ	33.3832511901855	T16	circ	33.6361274719238	T26	circ2	32.3265838623047	T36	circ2	33.1998414611816	T46	circ2	34.0839538574219	T56	circ2	Undetermined	T56	circ2	Undetermined	T66	circ2	32.2881736755371	T76	circ2	34.5688705444336
		T6	gadp	19.524772644043	T16	gadp	22.8152980804443	T26	gad2	18.763729095459	T36	gad2	22.9437007904053	T46	gad2	22.9816627502441	T56	gad2	22.958683013916	T56	gad2	22.958683013916	T66	gad2	18.7406806945801	T76	gad2	24.6919956207275
		T6	gadp	18.9680347442627	T16	gadp	22.405969619751	T26	gad2	18.163729095459	T36	gad2	22.1037007904053	T46	gad2	23.0453968048096	T56	gad2	23.0952816009521	T56	gad2	23.0952816009521	T66	gad2	18.8115234375	T76	gad2	24.642822265625
		T6	gadp	19.5504360198975	T16	gadp	22.9927845001221	T26	gad2	18.763729095459	T36	gad2	22.1437007904053	T46	gad2	22.8040447235107	T56	gad2	23.0611476898193	T56	gad2	23.0611476898193	T66	gad2	18.7389812469482	T76	gad2	24.643180847168
		P6	circ	34.7969818115234	P16	circ	34.8205795288086	P26	circ2	36.3023986816406	P36	circ2	31.7468826293945	P46	circ2	35.9726371765137	P56	circ2	Undetermined	P56	circ2	Undetermined	P66	circ2	35.6094436645508	P76	circ2	35.3080978393555
		P6	circ	35.922924041748	P16	circ	36.7653694152832	P26	circ2	35.3323986816406	P36	circ2	31.7968826293945	P46	circ2	Undetermined	P56	circ2	Undetermined	P56	circ2	Undetermined	P66	circ2	35.7644996643066	P76	circ2	35.4680252075195
		P6	circ	35.3316345214844	P16	circ	37.6035041809082	P26	circ2	36.1023686816406	P36	circ2	32.7968826293945	P46	circ2	35.6211242675781	P56	circ2	Undetermined	P56	circ2	Undetermined	P66	circ2	37.5332527160645	P76	circ2	36.7790145874023
		P6	gadp	21.6851863861084	P16	gadp	27.6579055786133	P26	gad2	24.1876026153564	P36	gad2	25.1506923675537	P46	gad2	25.2341117858887	P56	gad2	35.0698280334473	P56	gad2	35.0698280334473	P66	gad2	25.5512180328369	P76	gad2	25.0491218566895
		P6	gadp	21.8098125457764	P16	gadp	27.9278182983398	P26	gad2	25.0876026153564	P36	gad2	25.2506923675537	P46	gad2	25.3121013641357	P56	gad2	34.5415420532227	P56	gad2	34.5415420532227	P66	gad2	25.5524635314941	P76	gad2	25.3111877441406
		P6	gadp	21.7493419647217	P16	gadp	27.3612747192383	P26	gad2	25.5866026153564	P36	gad2	24.2506923675537	P46	gad2	25.2058658599854	P56	gad2	35.1483001708984	P56	gad2	35.1483001708984	P66	gad2	25.6591300964355	P76	gad2	25.3721656799316
		T7	circ	30.5963859558105	T17	circ	31.4110855102539	T27	circ	31.7362632751465	T37	circ	35.5429153442383	T47	circ	34.3573684692383	T57	circ	36.4907379150391	T57	circ	36.4907379150391	T67	circ	36.0815200805664	T77	circ	34.3504676818848
		T7	circ	30.1368859558105	T17	circ	32.2228401184082	T27	circ	32.0818367004395	T37	circ	35.0429153442383	T47	circ	36.728458404541	T57	circ	37.2002029418945	T57	circ	37.2002029418945	T67	circ	36.6231956481934	T77	circ	Undetermined
		T7	circ	30.2963659558105	T17	circ	32.9308311462402	T27	circ	31.0290260314941	T37	circ	35.3429153442383	T47	circ	Undetermined	T57	circ	35.6480674743652	T57	circ	35.6480674743652	T67	circ	35.3157768249512	T77	circ	35.4315147399902
		T7	gadp	25.4652214050293	T17	gadp	21.0974868774414	T27	gadp	19.3184356689453	T37	gadp	25.1332981109619	T47	gadp	25.4059410095215	T57	gadp	13.7756366729736	T57	gadp	13.7756366729736	T67	gadp	25.1649322509766	T77	gadp	25.0534934997559
		T7	gadp	25.447338104248	T17	gadp	21.2621780395508	T27	gadp	19.2478313446045	T37	gadp	24.4332981109619	T47	gadp	25.4778995513916	T57	gadp	13.8121519088745	T57	gadp	13.8121519088745	T67	gadp	25.1226234436035	T77	gadp	25.0645484924316
		T7	gadp	25.0326480865479	T17	gadp	21.8751850128174	T27	gadp	19.2945652008057	T37	gadp	25.4332981109619	T47	gadp	25.4160575866699	T57	gadp	13.7804174423218	T57	gadp	13.7804174423218	T67	gadp	25.1764144897461	T77	gadp	24.9276924133301
		P7	circ	34.6247572631836	P17	circ	34.8475036621094	P27	circ	34.7098541259766	P37	circ	36.0068321228027	P47	circ	36.0815200805664	P57	circ	33.9258117675781	P57	circ	33.9258117675781	P67	circ	32.4593048095703	P77	circ	33.0936317443848
		P7	circ	35.1207572631836	P17	circ	35.8847160339355	P27	circ	34.5318984985352	P37	circ	36.2068321228027	P47	circ	36.6231956481934	P57	circ	34.3627662658691	P57	circ	34.3627662658691	P67	circ	32.2322692871094	P77	circ	33.2919425964355
		P7	circ	35.4277572631836	P17	circ	34.6797294616699	P27	circ	Undetermined	P37	circ	36.1068321228027	P47	circ	35.3157768249512	P57	circ	35.4703025817871	P57	circ	35.4703025817871	P67	circ	32.2881736755371	P77	circ	34.0839538574219
		P7	gadp	29.4584636688232	P17	gadp	25.3366565704346	P27	gadp	25.4512920379639	P37	gadp	25.1546573638916	P47	gadp	25.1649322509766	P57	gadp	15.5456562042236	P57	gadp	15.5456562042236	P67	gadp	18.7406806945801	P77	gadp	22.9816627502441
		P7	gadp	29.1888198852539	P17	gadp	25.4255180358887	P27	gadp	25.4783935546875	P37	gadp	25.1246573638916	P47	gadp	25.1226234436035	P57	gadp	15.4218912124634	P57	gadp	15.4218912124634	P67	gadp	18.8115234375	P77	gadp	23.0453968048096
		P7	gadp	29.4568176269531	P17	gadp	25.2526607513428	P27	gadp	25.5132293701172	P37	gadp	25.0546573638916	P47	gadp	25.1764144897461	P57	gadp	15.5337057113647	P57	gadp	15.5337057113647	P67	gadp	18.7389812469482	P77	gadp	22.8040447235107
		T8	circ	34.5963859558105	T18	circ	35.4725112915039	T28	circ	33.3283004760742	T38	circ	32.3265838623047	T48	circ	32.4593048095703	T58	circ	35.1619300842285	T58	circ	35.1619300842285	T68	circ	34.7098541259766	T78	circ	35.9726371765137
		T8	circ	35.7017860412598	T18	circ	35.0844192504883	T28	circ	32.5303497314453	T38	circ	32.3465838623047	T48	circ	32.2322692871094	T58	circ	34.4570198059082	T58	circ	34.4570198059082	T68	circ	34.5318984985352	T78	circ	Undetermined
		T8	circ	33.6361274719238	T18	circ	33.3894348144531	T28	circ	32.9322662353516	T38	circ	31.3265838623047	T48	circ	32.2881736755371	T58	circ	34.0455207824707	T58	circ	34.0455207824707	T68	circ	Undetermined	T78	circ	35.6211242675781
		T8	gadp	22.8152980804443	T18	gadp	23.2330150604248	T28	gadp	21.6635284423828	T38	gadp	18.163729095459	T48	gadp	18.7406806945801	T58	gadp	15.4883661270142	T58	gadp	15.4883661270142	T68	gadp	25.4512920379639	T78	gadp	25.2341117858887
		T8	gadp	22.405969619751	T18	gadp	23.3444976806641	T28	gadp	21.5600242614746	T38	gadp	18.763729095459	T48	gadp	18.8115234375	T58	gadp	15.3834657669067	T58	gadp	15.3834657669067	T68	gadp	25.4783935546875	T78	gadp	25.3121013641357
		T8	gadp	22.9927845001221	T18	gadp	23.2409057617188	T28	gadp	21.7166633605957	T38	gadp	17.793729095459	T48	gadp	18.7389812469482	T58	gadp	15.6595573425293	T58	gadp	15.6595573425293	T68	gadp	25.5132293701172	T78	gadp	25.2058658599854
		P8	circ	34.8205795288086	P18	circ	33.4792022705078	P28	circ	34.7634048461914	P38	circ	35.3023986816406	P48	circ	35.6094436645508	P58	circ	35.3446807861328	P58	circ	35.3446807861328	P68	circ	33.3283004760742	P78	circ	34.3573684692383
		P8	circ	36.7653694152832	P18	circ	34.3062744140625	P28	circ	34.3975448608398	P38	circ	36.3023986816406	P48	circ	35.7644996643066	P58	circ	34.3681602478027	P58	circ	34.3681602478027	P68	circ	32.5303497314453	P78	circ	36.728458404541
		P8	circ	37.6035041809082	P18	circ	Undetermined	P28	circ	34.4286766052246	P38	circ	36.1023986816406	P48	circ	37.5332527160645	P58	circ	Undetermined	P58	circ	Undetermined	P68	circ	32.9322662353516	P78	circ	Undetermined
		P8	gadp	27.6579055786133	P18	gadp	26.3058528900146	P28	gadp	26.2823944091797	P38	gadp	24.0876026153564	P48	gadp	25.5512180328369	P58	gadp	24.5602340698242	P58	gadp	24.5602340698242	P68	gadp	21.6635284423828	P78	gadp	25.4059410095215
		P8	gadp	27.9278182983398	P18	gadp	26.3139190673828	P28	gadp	24.9899463653564	P38	gadp	25.5876026153564	P48	gadp	25.5524635314941	P58	gadp	24.7349224090576	P58	gadp	24.7349224090576	P68	gadp	21.5600242614746	P78	gadp	25.4778995513916
		P8	gadp	27.12278182983368	P18	gadp	26.0785827636719	P28	gadp	24.8030548095703	P38	gadp	25.3876026153564	P48	gadp	25.6591300964355	P58	gadp	24.6802043914794	P58	gadp	24.6802043914794	P68	gadp	21.7166633605957	P78	gadp	25.4160575866699
		T9	circ	33.5110855102539	P19	circ1	33.743408203125	T29	circ	32.9361801147461	T39	circ	33.0936317443848	T49	circ	36.0815200805664	T59	circ	32.3265838623047	T59	circ	34.4910697937012	T69	circ	34.7634048461914	T79	circ	35.6094436645508
		T9	circ	32.4228401184082	P19	circ1	33.0347213745117	T29	circ	33.1986465454102	T39	circ	33.2919425964355	T49	circ	36.6231956481934	T59	circ	32.3465838623047	T59	circ	34.4010697937012	T69	circ	34.3975448608398	T79	circ	35.7644996643066
		T9	circ	32.2308311462402	P19	circ1	34.7675971984863	T29	circ	33.3832511901855	T39	circ	34.0839538574219	T49	circ	35.3157768249512	T59	circ	31.3265838623047	T59	circ	34.1910697937012	T69	circ	34.4286766052246	T79	circ	37.5332527160645
		T9	gadp	22.1974868774414	P19	gad1	21.982048034668	T29	gadp	19.524772644043	T39	gadp	22.9816627502441	T49	gadp	25.1649322509766	T59	gadp	18.163729095459	T59	gadp	22.1469402313232	T69	gadp	26.2823944091797	T79	gadp	25.5512180328369
		T9	gadp	21.6621780395508	P19	gad1	21.744119644165	T29	gadp	18.9680347442627	T39	gadp	23.0453968048096	T49	gadp	25.1226234436035	T59	gadp	18.763729095459	T59	gadp	21.6469402313232	T69	gadp	24.9899463653564	T79	gadp	25.5524635314941
		T9	gadp	21.8751850128174	P19	gad1	21.9438400268555	T29	gadp	19.5504360198975	T39	gadp	22.8040447235107	T49	gadp	25.1764144897461	T59	gadp	17.793729095459	T59	gadp	22.6469402313232	T69	gadp	24.8030548095703	T79	gadp	25.6591300964355
		P9	circ	31.8475036621094	T19	circ1	34.3504676818848	P29	circ	34.7969818115234	P39	circ	35.9726371765137	P49	circ	32.4593048095703	P59	circ	35.3023986816406	P59	circ	35.36474609375	P69	circ	32.9361801147461	P79	circ	33.4792022705078
		P9	circ	36.8847160339355	T19	circ1	Undetermined	P29	circ	35.922924041748	P39	circ	Undetermined	P49	circ	32.2322692871094	P59	circ	36.3023986816406	P59	circ	34.16474609375	P69	circ	33.1986465454102	P79	circ	34.3062744140625
		P9	circ	34.6797294616699	T19	circ1	35.4315147399902	P29	circ	35.3316345214844	P39	circ	35.6211242675781	P49	circ	32.2881736755371	P59	circ	36.1023986816406	P59	circ	35.36474609375	P69	circ	33.3832511901855	P79	circ	Undetermined
		P9	gadp	25.3366565704346	T19	gad1	25.0534934997559	P29	gadp	21.6851863861084	P39	gadp	25.2341117858887	P49	gadp	18.7406806945801	P59	gadp	24.0876026153564	P59	gadp	22.0563472747803	P69	gadp	19.524772644043	P79	gadp	26.3058528900146
		P9	gadp	25.4255180358887	T19	gad1	25.0645484924316	P29	gadp	21.8098125457764	P39	gadp	25.3121013641357	P49	gadp	18.8115234375	P59	gadp	25.5876026153564	P59	gadp	21.1563472747803	P69	gadp	18.9680347442627	P79	gadp	26.3139190673828
		P9	gadp	25.2526607513428	T19	gad1	24.9276924133301	P29	gadp	21.7493419647217	P39	gadp	25.2058658599854	P49	gadp	18.7389812469482	P59	gadp	25.3876026153564	P59	gadp	22.0563472747803	P69	gadp	19.5504360198975	P79	gadp	26.0785827636719
		T10	circ	35.4725112915039	T20	circ1	33.0936317443848	T30	circ	31.8475036621094	T40	circ	34.3573684692383	T50	circ	35.6094436645508	T60	circ	32.9361801147461	T60	circ	33.8011627197266	T70	circ	34.7969818115234	T80	circ	35.0332374572754
		T10	circ	35.0844192504883	T20	circ1	33.2919425964355	T30	circ	36.8847160339355	T40	circ	36.728458404541	T50	circ	35.7644996643066	T60	circ	33.1986465454102	T60	circ	34.1011627197266	T70	circ	35.922924041748	T80	circ	34.2580986022949
		T10	circ	33.3894348144531	T20	circ1	34.0839538574219	T30	circ	34.6797294616699	T40	circ	Undetermined	T50	circ	37.5332527160645	T60	circ	33.3832511901855	T60	circ	34.1011627197266	T70	circ	35.3316345214844	T80	circ	34.5688705444336
		T10	gadp	23.2330150604248	T20	gad1	22.9816627502441	T30	gadp	25.3366565704346	T40	gadp	25.4059410095215	T50	gadp	25.5512180328369	T60	gadp	19.524772644043	T60	gadp	25.21931640625	T70	gadp	21.6851863861084	T80	gadp	24.6919956207275
		T10	gadp	23.3444976806641	T20	gad1	23.0453968048096	T30	gadp	25.4255180358887	T40	gadp	25.4778995513916	T50	gadp	25.5524635314941	T60	gadp	18.9680347442627	T60	gadp	25.19931640625	T70	gadp	21.8098125457764	T80	gadp	24.642822265625
		T10	gadp	23.2409057617188	T20	gad1	22.8040447235107	T30	gadp	25.2526607513428	T40	gadp	25.4160575866699	T50	gadp	25.6591300964355	T60	gadp	19.5504360198975	T60	gadp	25.29931640625	T70	gadp	21.7493419647217	T80	gadp	24.643180847168
		P10	circ	33.4792022705078	P20	circ1	35.9726371765137	P30	circ	35.4725112915039	P40	circ	36.0815200805664	P50	circ	33.4792022705078	P60	circ	34.7969818115234	P60	circ	36.1045829772949	P70	circ	35.9726371765137	P80	circ	35.3080978393555
		P10	circ	34.3062744140625	P20	circ1	Undetermined	P30	circ	35.0844192504883	P40	circ	36.6231956481934	P50	circ	34.3062744140625	P60	circ	35.922924041748	P60	circ	36.4045829772949	P70	circ	Undetermined	P80	circ	35.4680252075195
		P10	circ	Undetermined	P20	circ1	35.6211242675781	P30	circ	33.3894348144531	P40	circ	35.3157768249512	P50	circ	Undetermined	P60	circ	35.3316345214844	P60	circ	36.2043829772949	P70	circ	35.6211242675781	P80	circ	36.7790145874023
		P10	gadp	26.3058528900146	P20	gad1	25.2341117858887	P30	gadp	23.2330150604248	P40	gadp	25.1649322509766	P50	gadp	26.3058528900146	P60	gadp	21.6851863861084	P60	gadp	24.3030223846436	P70	gadp	25.2341117858887	P80	gadp	25.0491218566895
		P10	gadp	26.3139190673828	P20	gad1	25.3121013641357	P30	gadp	23.3444976806641	P40	gadp	25.1226234436035	P50	gadp	26.3139190673828	P60	gadp	21.8098125457764	P60	gadp	25.1030223846436	P70	gadp	25.3121013641357	P80	gadp	25.3111877441406
		P10	gadp	26.0785827636719	P20	gad1	25.2058658599854	P30	gadp	23.2409	P40	gadp	25.1764144897461	P50	gadp	26.0785827636719	P60	gadp	21.7493419647217	P60	gadp	25.3030223846436	P70	gadp	25.2058658599854	P80	gadp	25.3721656799316
Figure 1D(Relative expression of circCOPA in HCC cells)		Primary(Ct)	MHCC-97H	MHCC-97L	Hep-3B	Huh7	MHCC-LM3	HepG2
	circ	36.0815	34.3505	33.3505	33.6094	33.6094	33.4907	33.3505
	circ	36.6232	Undetermined	Undetermined	33.7645	33.7645	33.2002	Undetermined
	circ	35.3158	35.4315	33.4315	33.5333	33.5333	33.6481	33.4315
	gadp	25.1649	25.0535	24.0535	24.5512	24.5512	24.7756	22.0535
	gadp	25.1226	25.0645	24.0645	24.5525	24.5525	24.8122	22.0645
	gadp	25.1764	24.9277	24.9277	24.6591	24.6591	24.7804	22.9277
	circ	33.5111	34.7099	31.0936	33.0815	32.7434	33.6094	33.0936
	circ	32.228401184082	34.5319	31.2919	33.6232	32.0347	33.7645	33.2919
	circ	32.1308311462402	Undetermined	31.084	33.3158	32.7676	33.5333	33.084
	gadp	21.1974868774414	21.1974868774414	22.9817	24.1649	22.982	24.5512	22.9817
	gadp	21.1974868774414	25.4513	22.0454	24.1226	22.7441	24.5525	22.0454
	gadp	21.6621780395508	25.4784	22.804	24.1764	22.9438	24.6591	22.804
	circ	35.0815200805664	25.5132	33.6094	33.3505	33.3505	31.743408203125	35.9726
	circ	35.6231956481934	33.3283	33.7645	Undetermined	Undetermined	32.0347	Undetermined
	circ	34.3157768249512	32.5303	33.5333	33.4315	33.4315	32.7676	35.6211
	gadp	25.1649	32.9323	23.8512180328369	24.0535	24.0535	23.9820480346679	23.2341
	gadp	24.9026234436035	23.6635	24.5512	24.0645	24.0645	23.744119644165	23.3121
	gadp	25.1764	23.56	24.5525	24.9277	24.9277	23.9438400268554	23.2059
Figure 1I(Relative expression of circCOPA and COPA mRNA)			circCOPA	Mock	Rnase		COPA mRNA	Mock	Rnase			circCOPA	Mock	Rnase		COPA mRNA	Mock	Rnase
		LM3	circ	34.0815200805664	34.6247572631836			33.3283	34.5964		Figure 1J(Relative expression of circCOPA and COPA mRNA)		34.5964	33.3283			32.3266	35.6094
			circ	34.6231956481934	35.1207572631836			32.5303	35.7018				35.7018	32.5303			32.3465838623047	35.7645
			circ	35.3158	35.4278			32.9323	33.6361				33.6361	32.9323			31.3265838623047	37.5333
			gadp	25.1649	29.4585			21.6635	22.8153				22.8153	21.6635			18.163729095459	25.5512
			gadp	24.1226234436035	29.1888			21.56	22.406				22.406	21.56			18.7637	25.5525
			gadp	24.1764144897461	29.4568			21.7167	22.9928				22.9928	21.7167			17.793729095459	25.6591
			circ	33.5111	34.5964			34.7634	34.8206				34.8206	34.7634			35.3023986816406	33.4792
			circ	31.228401184082	35.7018			34.3975	36.7654		Hep3B		36.7654	34.3975			36.3023986816406	34.3063
			circ	32.1308311462402	33.6361			34.4287	37.6035				37.6035	34.4287			36.1023986816406	Undetermined
			gadp	21.1974868774414	22.8153			26.2824	27.6579				27.6579	26.2824			24.0876026153564	26.3059
			gadp	21.1974868774414	22.406			24.9899	27.9278				27.9278	24.9899			25.5876026153564	26.3139
			gadp	21.6621780395508	22.9928			24.8031	27.12278182983368				27.3613	24.8031			25.3876026153564	26.0786
			circ	35.0815200805664	34.8206			32.9362	33.5111				31.4110855102539	32.9362			32.9362	35.0332
			circ	35.6231956481934	36.7654			33.1986	32.4228				32.2228401184082	33.1986			33.1986	34.2581
			circ	34.3157768249512	37.6035			33.3833	32.2308				32.9308311462402	33.3833			33.3833	34.5689
			gadp	24.1649322509766	27.6579			19.5248	22.1975				21.0974868774414	19.5248			19.5248	24.692
			gadp	24.9026234436035	27.9278			18.968	21.6622				21.2621780395508	18.968			18.968	24.6428
			gadp	25.1764	27.12278182983368			19.5504	21.8752				21.8752	19.5504			19.5504	24.6432
Figure 1K(Relative expression of circCOPA and COPA mRNA)	LM3		Ct	circCOPA	COPA mRNA				Ct		circCOPA	COPA mRNA
		0H	circ	36.0815200805664	33.6094436645507		Figure 1L(Relative expression of circCOPA and COPA mRNA)	Hep3B		circ	32.0815200805664	34.3504676818848
			circ	36.6231956481934	33.7644996643066				0H	circ	33.6231956481934	Undetermined
			circ	35.3157768249512	33.5332527160644					circ	33.3157768249512	33.4315147399902
			gadp	25.1649322509766	24.5512180328369					gadp	25.1649322509766	25.0534934997559
			gadp	25.1226234436035	24.5524635314941					gadp	25.1226234436035	25.0645484924316
			gadp	25.1764144897461	24.6591300964355					gadp	25.1764144897461	24.9276924133301
		6h	circ	33.743408203125	33.3504676818847					circ	33.5110855102539	34.7098541259766
			circ	33.0347213745117	Undetermined				6h	circ	32.228401184082	34.5318984985352
			circ	33.7675971984863	33.4315147399902					circ	32.1308311462402	Undetermined
			gadp	22.9820480346679	22.0534934997558					gadp	23.1974868774414	25.1974868774414
			gadp	22.744119644165	22.0645484924316					gadp	23.1974868774414	25.4512920379639
			gadp	22.9438400268554	22.92769241333					gadp	21.6621780395508	25.4783935546875
		12H	circ	32.3265838623047	33.0936317443847					circ	35.0815200805664	25.5132293701172
			circ	32.3465838623047	33.2919425964355				12H	circ	35.6231956481934	33.3283004760742
			circ	31.3265838623047	33.0839538574218					circ	34.3157768249512	32.5303497314453
			gadp	18.163729095459	22.9816627502441					gadp	23.1649322509766	32.9322662353516
			gadp	18.763729095459	22.0453968048095					gadp	24.9026234436035	23.6635284423828
			gadp	17.793729095459	22.8040447235107					gadp	25.1764144897461	23.5600242614746
		18H	circ	35.3023986816406	34.490737915039					circ	33.3283004760742	34.5963859558105
			circ	36.3023986816406	34.2002029418945				18H	circ	32.5303497314453	35.7017860412598
			circ	36.1023986816406	34.6480674743652					circ	32.9322662353516	33.6361274719238
			gadp	24.0876026153564	24.7756366729736					gadp	21.6635284423828	22.8152980804443
			gadp	25.5876026153564	24.8121519088745					gadp	21.5600242614746	22.405969619751
			gadp	25.3876026153564	24.7804174423217					gadp	21.7166633605957	22.9927845001221
		24H	circ	35.9726371765137	33.6094436645507					circ	34.7634048461914	34.8205795288086
			circ	Undetermined	33.7644996643066				24H	circ	34.3975448608398	36.7653694152832
			circ	35.6211242675781	33.5332527160644					circ	34.4286766052246	37.6035041809082
			gadp	23.2341117858887	22.5512180328369					gadp	26.2823944091797	27.6579055786133
			gadp	23.3121013641357	22.5524635314941					gadp	24.9899463653564	27.9278182983398
			gadp	23.2058658599854	22.6591300964355					gadp	24.8030548095703	27.12278182983368
Figure 1N(Relative expression of RNA)			Cytoplasm	Necleus		Cytoplasm	Necleus			Cytoplasm	Necleus			Figure 1O(Relative expression of RNA)			Cytoplasm	Necleus		Cytoplasm	Necleus			Cytoplasm	Necleus
	circ	U6	35.9726371765137	33.0936	GAPDH	36.0815	35.9726		circCOPA	32.7434	32.4593				circ	U6	33.743408203125	33.743408203125	GAPDH	33.6094436645507	32.3266		circCOPA	36.0815	34.3505
	circ		Undetermined	33.2919		36.6232	Undetermined			32.0347	32.2323				circ		33.0347213745117	33.0347213745117		33.7644996643066	32.3465838623047			36.6232	Undetermined
	circ		35.6211	34.084		35.3158	35.6211			32.7676	32.2882				circ		34.7675971984863	34.7675971984863		33.5332527160644	31.3265838623047			35.3158	35.4315
	gadp		23.2341	22.9817		25.1649	23.2341			22.982	21.7407				gadp		21.982048034668	21.982048034668		24.5512180328369	18.163729095459			25.1649	25.0535
	gadp		23.3121	23.0454		25.1226	23.3121			22.7441	21.8115				gadp		21.744119644165	21.744119644165		24.5524635314941	18.7637			25.1226	25.0645
	gadp		23.2059	22.804		25.1764	23.2059			22.9438	21.739				gadp		21.9438400268555	21.9438400268555		24.6591300964355	17.793729095459			25.1764	24.9277
	circ		33.3505	35.9726		32.4593	34.3574			33.3505	34.6094				circ		34.3504676818848	34.3504676818848		33.3504676818847	35.3023986816406			33.5111	34.7099
	circ		Undetermined	Undetermined		32.2323	34.7285			Undetermined	34.7645				circ		Undetermined	Undetermined		Undetermined	36.3023986816406			32.228401184082	34.5319
	circ		33.4315	35.6211		32.2882	Undetermined			33.4315	34.5333				circ		35.4315147399902	35.4315147399902		33.4315147399902	36.1023986816406			32.1308311462402	Undetermined
	gadp		21.0534934997558	25.2341		18.7407	22.4059			22.0535	24.5512				gadp		25.0534934997559	25.0534934997559		22.0534934997558	24.0876026153564			21.1974868774414	21.1974868774414
	gadp		21.0645484924316	25.3121		18.8115	22.4779			22.0645	24.5525				gadp		25.0645484924316	25.0645484924316		22.0645484924316	25.5876026153564			21.1974868774414	25.4513
	gadp		21.9277	25.2059		18.739	22.4161			22.9277	24.6591				gadp		24.9276924133301	24.9276924133301		22.92769241333	25.3876026153564			21.6621780395508	25.4784
	circ		33.0936	34.3574		Undetermined	33.0815			33.0936	33.4593				circ		33.0936317443848	33.0936317443848		33.0936317443847	32.9362			35.0815200805664	25.5132
	circ		33.2919425964355	36.7285		33.7996	33.6232			33.2919	34.2323				circ		33.2919425964355	33.2919425964355		33.2919425964355	33.1986			35.6231956481934	33.3283
	circ		33.084	Undetermined		33.1121	33.3158			33.084	34.2882				circ		34.0839538574219	34.0839538574219		33.0839538574218	33.3833			34.3157768249512	32.5303
	gadp		21.9816627502441	25.4059		23.9587	22.1649322509765			22.9817	22.7407				gadp		22.9816627502441	22.9816627502441		22.9816627502441	19.5248			25.1649	32.9323
	gadp		21.0453968048095	25.4779		23.0953	21.1226234436035			22.0454	22.8115				gadp		23.0453968048096	23.0453968048096		22.0453968048095	18.968			24.9026234436035	23.6635
	gadp		22.804	25.4161		23.0611	21.176414489746			22.804	22.739				gadp		22.8040447235107	22.8040447235107		22.8040447235107	19.5504			25.1764	23.56
Figure 2A(Relative expression)
		circCOPA	si-NC	si-circCOPA-1	si-circCOPA-2	COPA mRNA	si-NC	si-circCOPA-1	si-circCOPA-2				circCOPA	Vector	circCOPA-OE		COPA mRNA	Vector	circCOPA-OE
	LM3	circ	33.0936317443847	32.743408203125	33.6094436645507		36.0815200805664	35.0815200805664	35.9726371765137			circ		33.0936317443847	34.7098541259766			36.0815200805664	32.7434
		circ	33.2919425964355	32.0347213745117	33.7644996643066		36.6231956481934	35.6231956481934	Undetermined			circ		33.2919425964355	34.5318984985352			36.6231956481934	32.0347
		circ	33.0839538574218	32.7675971984863	33.5332527160644		35.3157768249512	35.3157768249512	35.6211242675781			circ		33.0839538574218	Undetermined			35.3157768249512	32.7676
		gadp	22.9816627502441	22.9820480346679	22.5512180328369		25.1649322509766	25.1649322509766	24.2341117858886		Figure 2B(Relative expression)	gadp		22.9816627502441	25.4512920379639			25.1649322509766	22.982
		gadp	22.0453968048095	22.744119644165	22.5524635314941		25.1226234436035	25.1226234436035	24.3121013641357			gadp		22.0453968048095	25.4783935546875			25.1226234436035	22.7441
		gadp	22.8040447235107	22.9438400268554	22.6591300964355		25.1764144897461	25.1764144897461	24.2058658599853			gadp		22.8040447235107	25.5132293701172			25.1764144897461	22.9438
		circ	31.0936317443847	32.3504676818847	33.0815200805664		33.5110855102539	32.4593048095703	34.3573684692383			circ		31.0936317443847	33.3283004760742			33.5110855102539	33.3505
		circ	31.2919425964355	Undetermined	33.6231956481933		32.228401184082	32.2322692871094	34.728458404541			circ		31.2919425964355	32.5303497314453			32.228401184082	Undetermined
		circ	31.0839538574218	32.4315147399902	33.3157768249511		32.1308311462402	32.2881736755371	Undetermined			circ		31.0839538574218	32.9322662353516			32.1308311462402	33.4315
		gadp	21.9816627502441	22.0534934997558	21.1649322509765		21.1974868774414	22.7406806945801	23.4059410095214			gadp		21.9816627502441	24.6635284423828			21.1974868774414	22.0535
		gadp	21.0453968048095	22.0645484924316	22.1226234436035		21.1974868774414	21.8115234375	23.4778995513916			gadp		21.0453968048095	24.5600242614746			21.1974868774414	22.0645
		gadp	22.8040447235107	22.92769241333	22.176414489746		21.6621780395508	22.7389812469482	23.4160575866699			gadp		22.8040447235107	24.7166633605957			21.6621780395508	22.9277
		circ	35.9726371765137	31.0936317443847	33.3504676818847		35.0815200805664	Undetermined	33.0815200805664			circ		35.9726371765137	34.7634048461914			35.0815200805664	33.0936
		circ	Undetermined	31.2919425964355	Undetermined		35.6231956481934	33.7996387481689	33.6231956481933			circ		Undetermined	34.3975448608398			35.6231956481934	33.2919
		circ	35.6211242675781	31.0839538574218	33.4315147399902		34.3157768249512	33.1121139526367	33.3157768249511			circ		35.6211242675781	34.4286766052246			34.3157768249512	33.084
		gadp	25.2341117858887	20.9816627502441	22.0534934997558		25.1649322509766	21.958683013916	22.1649322509765			gadp		25.2341117858887	25.2823944091796			25.1649322509766	22.9817
		gadp	25.3121013641357	20.0453968048095	22.0645484924316		24.9026234436035	21.0952816009521	23.1226234436035			gadp		25.3121013641357	25.9899463653564			24.9026234436035	22.0454
		gadp	25.2058658599854	20.8040447235107	22.9276924133301		25.1764144897461	21.0611476898193	23.176414489746			gadp	0.3	25.2058658599854	25.8030548095703			25.1764144897461	22.804
		SH-NC	circCOPA	SPRED2	TGFB2	IGF1R	MET	RELA	MECOM	MAPK8IP3	DUSP10	CACNA1H	CACNB3	DDIT3	MAP2K1	EFNA1	PDGFC	MAP3K14			SH-circCOPA	circCOPA	SPRED2	TGFB2	IGF1R	MET	RELA	MECOM	MAPK8IP3	DUSP10	CACNA1H	CACNB3	DDIT3	MAP2K1	EFNA1	PDGFC	MAP3K14
Figure 4E(Relative expression)		circ	33.0936317443847	36.0815200805664	36.0815200805664	35.3023986816406	32.0815200805664	34.3504676818848	34.6247572631836	36.0815	34.3505	35.4725112915039	34.3248	36.0815200805664	32.7434	36.0815200805664	35.0815200805664	35.9726371765137				35.3815	32.0434	33.8964	33.0434	33.0434	32.9094	31.6266	35.3815	33.6505	33.6574	33.3815	33.9248	32.3936	34.9094	35.3815	33.6505
		circ	33.2919425964355	36.6231956481934	36.6231956481934	36.3023986816406	33.6231956481934	Undetermined	35.1207572631836	36.6232	Undetermined	35.0844192504883	34.8208	36.6231956481934	32.0347	36.6231956481934	35.6231956481934	Undetermined				35.9232	31.3347	35.0018	32.3347	32.3347	33.0645	31.6466	35.9232	Undetermined	36.0285	33.9232	34.4208	32.5919	35.0645	35.9232	Undetermined
		circ	33.0839538574218	35.3157768249512	35.3157768249512	36.1023986816406	33.3157768249512	33.4315147399902	35.4278	35.3158	35.4315	33.3894348144531	35.1278	35.3157768249512	32.7676	35.3157768249512	35.3157768249512	35.6211242675781				34.6158	32.0676	32.9361	34.0676	34.0676	32.8333	30.6266	34.6158	34.7315	Undetermined	34.6158	34.7278	33.384	36.8333	34.6158	34.7315
	LM3	gadp	22.9816627502441	25.1649322509766	25.1649322509766	24.0876026153564	25.1649322509766	25.0534934997559	29.4585	25.1649	25.0535	23.2330150604248	29.1585	25.1649322509766	22.982	25.1649322509766	25.1649322509766	24.2341117858886				24.4649	22.282	22.1153	21.282	21.282	23.8512	17.4637	24.4649	24.3535	24.7059	24.4649	28.7585	22.2817	24.8512	24.4649	24.3535
		gadp	22.0453968048095	25.1226234436035	25.1226234436035	25.5876026153564	25.1226234436035	25.0645484924316	29.1888	25.1226	25.0645	23.3444976806641	28.8888	25.1226234436035	22.7441	25.1226234436035	25.1226234436035	24.3121013641357				24.4226	22.0441	21.706	21.0441	21.0441	23.8525	18.0637	24.4226	24.3645	24.7779	23.4226	28.4888	22.3454	24.8525	24.4226	24.3645
		gadp	22.8040447235107	25.1764144897461	25.1764144897461	25.3876026153564	25.1764144897461	24.9276924133301	29.4568	25.1764	24.9277	23.2409057617188	29.1568	25.1764144897461	22.9438	25.1764144897461	25.1764144897461	24.2058658599853				24.4764	22.2438	22.2928	21.2438	21.2438	23.9591	17.0937	24.4764	24.2277	24.7161	23.4764	28.7568	22.104	24.9591	24.4764	24.2277
		circ	31.0936317443847	33.5110855102539	33.743408203125	33.5110855102539	33.5110855102539	34.7098541259766	34.5964	33.5111	34.7099	33.4792022705078	34.2964	33.5110855102539	33.3505	33.5110855102539	32.4593048095703	34.3573684692383				32.8111	32.6505	34.1206	33.6505	33.6505	32.6505	34.6024	32.8111	34.0099	34.9094	32.8111	33.8964	35.2726	32.7792	32.8111	34.0099
		circ	31.2919425964355	32.228401184082	33.0347213745117	32.228401184082	32.228401184082	34.5318984985352	35.7018	32.228401184082	34.5319	34.3062744140625	35.4018	32.228401184082	Undetermined	32.228401184082	32.2322692871094	34.728458404541				31.5284	Undetermined	36.0654	Undetermined	Undetermined	Undetermined	35.6024	31.5284	33.8319	35.0645	30.5284	35.0018	Undetermined	33.6063	31.5284	33.8319
		circ	31.0839538574218	32.1308311462402	33.7675971984863	32.1308311462402	32.1308311462402	Undetermined	33.6361	32.1308311462402	Undetermined	Undetermined	33.3361	32.1308311462402	33.4315	32.1308311462402	32.2881736755371	Undetermined				31.4308	32.7315	36.9035	34.7315	34.7315	32.7315	35.4024	31.4308	Undetermined	36.8333	31.4308	32.9361	34.9211	Undetermined	31.4308	Undetermined
		gadp	21.9816627502441	21.1974868774414	22.9820480346679	21.1974868774414	23.1974868774414	25.1974868774414	22.8153	21.1974868774414	21.1974868774414	26.3058528900146	22.5153	21.1974868774414	22.0535	21.1974868774414	22.7406806945801	23.4059410095214				20.4975	21.3535	26.9579	24.3535	24.3535	21.3535	23.3876	20.4975	20.4975	24.8512	20.4975	22.1153	24.5341	25.6059	20.4975	20.4975
		gadp	21.0453968048095	21.1974868774414	22.744119644165	21.1974868774414	23.1974868774414	25.4512920379639	22.406	21.1974868774414	25.4513	26.3139190673828	22.106	21.1974868774414	22.0645	21.1974868774414	21.8115234375	23.4778995513916				20.4975	21.3645	27.2278	24.3645	24.3645	21.3645	24.8876	20.4975	24.7513	24.8525	20.4975	21.706	24.6121	25.6139	20.4975	24.7513
		gadp	22.8040447235107	21.6621780395508	22.9438400268554	21.6621780395508	21.6621780395508	25.4783935546875	22.9928	21.6621780395508	25.4784	26.0785827636719	22.6928	21.6621780395508	22.9277	21.6621780395508	22.7389812469482	23.4160575866699				20.9622	22.2277	26.4228	24.2277	24.2277	22.2277	24.6876	20.9622	24.7784	24.9591	20.9622	22.2928	24.5059	25.3786	20.9622	24.7784
		circ	35.9726371765137	35.0815200805664	32.3265838623047	35.0815200805664	35.0815200805664	25.5132293701172	34.8206	35.0815200805664	25.5132	33.743408203125	34.5206	35.0815200805664	33.0936	35.0815200805664	Undetermined	33.0815200805664				34.3815	32.3936	32.8111	32.3936	32.3936	32.3936	32.2362	34.3815	24.8132	32.7792	34.3815	34.1206	33.6574	34.1206	34.3815	24.8132
		circ	Undetermined	35.6231956481934	32.3465838623047	35.6231956481934	35.6231956481934	33.3283004760742	36.7654	35.6231956481934	33.3283	33.0347213745117	36.4654	35.6231956481934	33.2919	35.6231956481934	33.7996387481689	33.6231956481933				34.9232	32.5919	31.7228	32.5919	32.5919	32.5919	32.4986	34.9232	32.6283	33.6063	34.9232	36.0654	36.0285	36.0654	34.9232	32.6283
		circ	35.6211242675781	34.3157768249512	31.3265838623047	34.3157768249512	34.3157768249512	32.5303497314453	37.6035	34.3157768249512	32.5303	34.7675971984863	37.3035	34.3157768249512	33.084	34.3157768249512	33.1121139526367	33.3157768249511				33.6158	32.384	31.5308	33.384	33.384	32.384	32.6833	33.6158	31.8303	Undetermined	33.6158	36.9035	Undetermined	36.9035	33.6158	31.8303
		gadp	25.2341117858887	25.1649322509766	18.163729095459	25.1649322509766	23.1649322509766	32.9322662353516	27.6579	25.1649	32.9323	21.982048034668	27.3579	25.1649322509766	22.9817	25.1649322509766	21.958683013916	22.1649322509765				24.4649	22.2817	21.4975	22.2817	22.2817	22.2817	18.8248	24.4649	32.2323	25.6059	23.4649	26.9579	24.7059	26.9579	24.4649	32.2323
		gadp	25.3121013641357	24.9026234436035	18.763729095459	24.9026234436035	24.9026234436035	23.6635284423828	27.9278	24.9026234436035	23.6635	21.744119644165	27.6278	24.9026234436035	22.0454	24.9026234436035	21.0952816009521	23.1226234436035				24.2026	21.3454	20.9622	22.3454	22.3454	21.3454	18.268	24.2026	22.9635	25.6139	24.2026	27.2278	24.7779	27.2278	24.2026	22.9635
		gadp	25.2058658599854	25.1764144897461	17.793729095459	25.1764144897461	25.1764144897461	23.5600242614746	27.12278182983368	25.1764	23.56	21.9438400268555	26.8228	25.1764144897461	22.804	25.1764144897461	21.0611476898193	23.176414489746				24.4764	22.104	21.1752	22.104	22.104	22.104	18.8504	24.4764	22.86	25.3786	24.4764	26.4228	24.7161	26.4228	24.4764	22.86
												0.6
		Vector	circCOPA	SPRED2	TGFB2	IGF1R	MET	RELA	MECOM	MAPK8IP3	DUSP10	CACNA1H	CACNB3	DDIT3	MAP2K1	EFNA1	PDGFC	MAP3K14			circCOPA-OE	circCOPA	SPRED2	TGFB2	IGF1R	MET	RELA	MECOM	MAPK8IP3	DUSP10	CACNA1H	CACNB3	DDIT3	MAP2K1	EFNA1	PDGFC	MAP3K14
Figure 4E(Relative expression)		circ	32.4936	35.4815	35.4815	34.7024	31.4815	33.7505	34.0248	35.4815	33.7505	34.8725	33.7248	36.0815200805664	32.7434	36.0815200805664	35.0815200805664	35.9726371765137				35.2815	33.9434	33.7964	32.9434	32.9434	32.8094	31.5266	35.2815	33.5505	33.5574	33.2815	33.8248	32.2936	34.8094	35.2815	33.5505
		circ	32.6919	36.0232	36.0232	35.7024	33.0232	Undetermined	34.5208	36.0232	Undetermined	34.4844	34.2208	36.6231956481934	32.0347	36.6231956481934	35.6231956481934	Undetermined				35.8232	33.2347	34.9018	32.2347	32.2347	32.9645	31.5466	35.8232	Undetermined	35.9285	33.8232	34.3208	32.4919	34.9645	35.8232	Undetermined
		circ	32.484	34.7158	34.7158	35.5024	32.7158	32.8315	34.8278	34.7158	34.8315	32.7894	34.5278	35.3157768249512	32.7676	35.3157768249512	35.3157768249512	35.6211242675781				34.5158	33.9676	32.8361	33.9676	33.9676	32.7333	30.5266	34.5158	34.6315	Undetermined	34.5158	34.6278	33.284	36.7333	34.5158	34.6315
	LM3	gadp	22.3817	24.5649	24.5649	23.4876	24.5649	24.4535	28.8585	24.5649	24.4535	22.633	28.5585	25.1649322509766	22.982	25.1649322509766	25.1649322509766	24.2341117858886				24.3649	22.182	22.0153	21.182	21.182	23.7512	17.3637	24.3649	24.2535	24.6059	24.3649	28.6585	22.1817	24.7512	24.3649	24.2535
		gadp	21.4454	24.5226	24.5226	24.9876	24.5226	24.4645	28.5888	24.5226	24.4645	22.7445	28.2888	25.1226234436035	22.7441	25.1226234436035	25.1226234436035	24.3121013641357				24.3226	21.9441	21.606	20.9441	20.9441	23.7525	17.9637	24.3226	24.2645	24.6779	23.3226	28.3888	22.2454	24.7525	24.3226	24.2645
		gadp	22.204	24.5764	24.5764	24.7876	24.5764	24.3277	28.8568	24.5764	24.3277	22.6409	28.5568	25.1764144897461	22.9438	25.1764144897461	25.1764144897461	24.2058658599853				24.3764	22.1438	22.1928	21.1438	21.1438	23.8591	16.9937	24.3764	24.1277	24.6161	23.3764	28.6568	22.004	24.8591	24.3764	24.1277
		circ	30.4936	32.9111	33.1434	32.9111	32.9111	34.1099	33.9964	32.9111	34.1099	32.8792	33.6964	33.5110855102539	33.3505	33.5110855102539	32.4593048095703	34.3573684692383				32.7111	32.5505	34.0206	33.5505	33.5505	32.5505	34.5024	32.7111	33.9099	34.8094	32.7111	33.7964	35.1726	32.6792	32.7111	33.9099
		circ	30.6919	31.6284	32.4347	31.6284	31.6284	33.9319	35.1018	31.6284	33.9319	33.7063	34.8018	32.228401184082	Undetermined	32.228401184082	32.2322692871094	34.728458404541				31.4284	Undetermined	35.9654	Undetermined	Undetermined	Undetermined	35.5024	31.4284	33.7319	34.9645	30.4284	34.9018	Undetermined	33.5063	31.4284	33.7319
		circ	30.484	31.5308	33.1676	31.5308	31.5308	Undetermined	33.0361	31.5308	Undetermined	Undetermined	32.7361	32.1308311462402	33.4315	32.1308311462402	32.2881736755371	Undetermined				31.3308	32.6315	36.8035	34.6315	34.6315	32.6315	35.3024	31.3308	Undetermined	36.7333	31.3308	32.8361	34.8211	Undetermined	31.3308	Undetermined
		gadp	21.3817	20.5975	22.382	20.5975	22.5975	24.5975	22.2153	20.5975	20.5975	25.7059	21.9153	21.1974868774414	22.0535	21.1974868774414	22.7406806945801	23.4059410095214				20.3975	20.2535	26.8579	24.2535	24.2535	21.2535	23.2876	20.3975	20.3975	24.7512	20.3975	22.0153	24.4341	25.5059	20.3975	20.3975
		gadp	20.4454	20.5975	22.1441	20.5975	22.5975	24.8513	21.806	20.5975	24.8513	25.7139	21.506	21.1974868774414	22.0645	21.1974868774414	21.8115234375	23.4778995513916				20.3975	20.2645	27.1278	24.2645	24.2645	21.2645	24.7876	20.3975	24.6513	24.7525	20.3975	21.606	24.5121	25.5139	20.3975	24.6513
		gadp	22.204	21.0622	22.3438	21.0622	21.0622	24.8784	22.3928	21.0622	24.8784	25.4786	22.0928	21.6621780395508	22.9277	21.6621780395508	22.7389812469482	23.4160575866699				20.8622	20.1277	26.3228	24.1277	24.1277	22.1277	24.5876	20.8622	24.6784	24.8591	20.8622	22.1928	24.4059	25.2786	20.8622	24.6784
		circ	35.3726	34.4815	31.7266	34.4815	34.4815	24.9132	34.2206	34.4815	24.9132	33.1434	33.9206	35.0815200805664	33.0936	35.0815200805664	Undetermined	33.0815200805664				34.2815	32.2936	32.7111	32.2936	32.2936	32.2936	32.1362	34.2815	24.7132	32.6792	34.2815	34.0206	33.5574	34.0206	34.2815	24.7132
		circ	Undetermined	35.0232	31.7466	35.0232	35.0232	32.7283	36.1654	35.0232	32.7283	32.4347	35.8654	35.6231956481934	33.2919	35.6231956481934	33.7996387481689	33.6231956481933				34.8232	32.4919	31.6228	32.4919	32.4919	32.4919	32.3986	34.8232	32.5283	33.5063	34.8232	35.9654	35.9285	35.9654	34.8232	32.5283
		circ	35.0211	33.7158	30.7266	33.7158	33.7158	31.9303	37.0035	33.7158	31.9303	34.1676	36.7035	34.3157768249512	33.084	34.3157768249512	33.1121139526367	33.3157768249511				33.5158	32.284	31.4308	33.284	33.284	32.284	32.5833	33.5158	31.7303	Undetermined	33.5158	36.8035	Undetermined	36.8035	33.5158	31.7303
		gadp	24.6341	24.5649	17.5637	24.5649	22.5649	32.3323	27.0579	24.5649	32.3323	21.382	26.7579	25.1649322509766	22.9817	25.1649322509766	21.958683013916	22.1649322509765				24.3649	21.1817	21.3975	22.1817	22.1817	22.1817	18.7248	24.3649	32.1323	25.5059	23.3649	26.8579	24.6059	26.8579	24.3649	32.1323
		gadp	24.7121	24.3026	18.1637	24.3026	24.3026	23.0635	27.3278	24.3026	23.0635	21.1441	27.0278	24.9026234436035	22.0454	24.9026234436035	21.0952816009521	23.1226234436035				24.1026	20.2454	20.8622	22.2454	22.2454	21.2454	18.168	24.1026	22.8635	25.5139	24.1026	27.1278	24.6779	27.1278	24.1026	22.8635
		gadp	24.6059	24.5764	17.1937	24.5764	24.5764	22.96	26.5228	24.5764	22.96	21.3438	26.2228	25.1764144897461	22.804	25.1764144897461	21.0611476898193	23.176414489746				24.3764	21.004	21.0752	22.004	22.004	22.004	18.7504	24.3764	22.76	25.2786	24.3764	26.3228	24.6161	26.3228	24.3764	22.76
Figure 4H(Relative expression of SPRED2 in 80 HCC samples)		Sample Name	Target Name	Cт	Sample Name	Target Name	Cт	Sample Name	Target Name	Cт	Sample Name	Target Name	Cт	Sample Name	Target Name	Cт	Sample Name	Target Name	Cт	Sample Name	Target Name	Cт	Sample Name	Target Name	Cт	Sample Name	Target Name
		T1	SPRED2	30.5110855102539	T11	SPRED2	36.1703	T21	SPRED2	32.3574	T31	SPRED2	32.5434	T41	SPRED2	32.2434	T51	SPRED2	33.0009	T51	SPRED2	33.2009	T61	SPRED2	32.4331	T71	SPRED2	33.1834
		T1	SPRED2	30.4228401184082	T11	SPRED2	Undetermined	T21	SPRED2	34.7285	T31	SPRED2	31.8347	T41	SPRED2	31.5347	T51	SPRED2	33.5132	T51	SPRED2	33.7132	T61	SPRED2	34.9663	T71	SPRED2	Undetermined
		T1	SPRED2	30.2308311462402	T11	SPRED2	36.0723	T21	SPRED2	Undetermined	T31	SPRED2	33.5676	T41	SPRED2	33.2676	T51	SPRED2	31.2591	T51	SPRED2	31.4591	T61	SPRED2	32.6948	T71	SPRED2	34.6752
		T1	gadp	18.1974868774414	T11	gadp	23.0789	T21	gadp	23.4059	T31	gadp	20.782	T41	gadp	20.482	T51	gadp	21.9632	T51	gadp	22.1632	T61	gadp	20.1336	T71	gadp	26.4944
		T1	gadp	19.6621780395508	T11	gadp	22.9289	T21	gadp	23.4779	T31	gadp	20.5441	T41	gadp	20.2441	T51	gadp	20.1763	T51	gadp	20.3763	T61	gadp	20.1176	T71	gadp	26.4746
		T1	gadp	19.8751850128174	T11	gadp	22.8811	T21	gadp	23.4161	T31	gadp	20.7438	T41	gadp	20.4438	T51	gadp	20.1013	T51	gadp	20.3013	T61	gadp	20.2179	T71	gadp	26.5334
		P1	SPRED2	31.8475036621094	P11	SPRED2	31.0723	P21	SPRED2	34.0815	P31	SPRED2	33.1505	P41	SPRED2	32.8505	P51	SPRED2	32.5331	P51	SPRED2	32.7331	P61	SPRED2	31.9668	P71	SPRED2	33.3152
		P1	SPRED2	30.8847160339355	P11	SPRED2	Undetermined	P21	SPRED2	34.6232	P31	SPRED2	Undetermined	P41	SPRED2	Undetermined	P51	SPRED2	35.0663	P51	SPRED2	35.2663	P61	SPRED2	33.4657	P71	SPRED2	33.2043
		P1	SPRED2	31.6797294616699	P11	SPRED2	29.9723	P21	SPRED2	33.3158	P31	SPRED2	34.2315	P41	SPRED2	33.9315	P51	SPRED2	32.7948	P51	SPRED2	32.9948	P61	SPRED2	32.9711	P71	SPRED2	33.9556
		P1	gadp	22.3366565704346	P11	gadp	23.1905	P21	gadp	23.1649	P31	gadp	23.8535	P41	gadp	23.5535	P51	gadp	20.2336	P51	gadp	20.4336	P61	gadp	23.124	P71	gadp	Undetermined
		P1	gadp	22.4255180358887	P11	gadp	23.2129	P21	gadp	23.1226	P31	gadp	23.8645	P41	gadp	23.5645	P51	gadp	20.2176	P51	gadp	20.4176	P61	gadp	23.3255	P71	gadp	32.7996
		P1	gadp	22.2526607513428	P11	gadp	23.1083	P21	gadp	23.1764	P31	gadp	23.7277	P41	gadp	23.4277	P51	gadp	20.3179	P51	gadp	20.5179	P61	gadp	23.4484	P71	gadp	32.1121
		T2	SPRED2	30.4725112915039	T12	SPRED2	29.7363	P22	SPRED2	30.4593	P32	SPRED2	31.8936	P42	SPRED2	31.5936	P52	SPRED2	32.0668	P52	SPRED2	32.2668	P62	SPRED2	33.5977	P72	SPRED2	Undetermined
		T2	SPRED2	30.0844192504883	T12	SPRED2	30.0818	P22	SPRED2	30.2323	P32	SPRED2	32.0919	P42	SPRED2	31.7919	P52	SPRED2	33.5657	P52	SPRED2	33.7657	P62	SPRED2	34.8995	P72	SPRED2	Undetermined
		T2	SPRED2	30.3894348144531	T12	SPRED2	29.029	P22	SPRED2	30.2882	P32	SPRED2	32.884	P42	SPRED2	32.584	P52	SPRED2	33.0711	P52	SPRED2	33.2711	P62	SPRED2	34.7165	P72	SPRED2	Undetermined
		T2	gadp	23.2330150604248	T12	gadp	17.3184	P22	gadp	16.7407	P32	gadp	21.7817	P42	gadp	21.4817	P52	gadp	23.224	P52	gadp	23.424	P62	gadp	23.2868	P72	gadp	20.9587
		T2	gadp	23.3444976806641	T12	gadp	17.2478	P22	gadp	16.8115	P32	gadp	21.8454	P42	gadp	21.5454	P52	gadp	23.4255	P52	gadp	23.6255	P62	gadp	23.3224	P72	gadp	21.0953
		T2	gadp	23.2409057617188	T12	gadp	17.2946	P22	gadp	16.739	P32	gadp	21.604	P42	gadp	21.304	P52	gadp	23.5484	P52	gadp	23.7484	P62	gadp	23.2999	P72	gadp	21.0611
		P2	SPRED2	33.4792022705078	P12	SPRED2	32.7099	T22	SPRED2	33.6094	T32	SPRED2	34.7726	T42	SPRED2	34.4726	T52	SPRED2	33.6977	T52	SPRED2	33.8977	T62	SPRED2	33.5977	T72	SPRED2	Undetermined
		P2	SPRED2	32.3062744140625	P12	SPRED2	32.5319	T22	SPRED2	33.7645	T32	SPRED2	Undetermined	T42	SPRED2	Undetermined	T52	SPRED2	34.9995	T52	SPRED2	35.1995	T62	SPRED2	33.8995	T72	SPRED2	Undetermined
		P2	SPRED2	Undetermined	P12	SPRED2	Undetermined	T22	SPRED2	32.5333	T32	SPRED2	34.4211	T42	SPRED2	34.1211	T52	SPRED2	34.8165	T52	SPRED2	35.0165	T62	SPRED2	33.7165	T72	SPRED2	Undetermined
		P2	gadp	20.3058528900146	P12	gadp	23.4513	T22	gadp	23.5512	T32	gadp	24.0341	T42	gadp	23.7341	T52	gadp	23.3868	T52	gadp	23.5868	T62	gadp	22.4778	T72	gadp	33.0698
		P2	gadp	20.3139190673828	P12	gadp	23.4784	T22	gadp	23.5525	T32	gadp	24.1121	T42	gadp	23.8121	T52	gadp	23.4224	T52	gadp	23.6224	T62	gadp	22.614	T72	gadp	32.5415
		P2	gadp	21.0785827636719	P12	gadp	23.5132	T22	gadp	23.6591	T32	gadp	24.0059	T42	gadp	23.7059	T52	gadp	23.3999	T52	gadp	23.5999	T62	gadp	22.4264	T72	gadp	33.1483
		T3	SPRED2	34.1703147888184	T13	SPRED2	31.3283	T23	SPRED2	31.8486	T33	SPRED2	33.1574	T43	SPRED2	32.8574	T53	SPRED2	33.6977	T53	SPRED2	33.8977	T63	SPRED2	31.9668	T73	SPRED2	34.4907
		T3	SPRED2	34.3703147888184	T13	SPRED2	30.5303	T23	SPRED2	31.1486	T33	SPRED2	35.5285	T43	SPRED2	35.2285	T53	SPRED2	33.9995	T53	SPRED2	34.1995	T63	SPRED2	33.4657	T73	SPRED2	35.2002
		T3	SPRED2	34.0722618103027	T13	SPRED2	30.9323	T23	SPRED2	30.8486	T33	SPRED2	Undetermined	T43	SPRED2	Undetermined	T53	SPRED2	33.8165	T53	SPRED2	34.0165	T63	SPRED2	32.9711	T73	SPRED2	33.6481
		T3	gadp	25.0788879394531	T13	gadp	19.6635	T23	gadp	19.89	T33	gadp	24.2059	T43	gadp	23.9059	T53	gadp	22.5778	T53	gadp	22.7778	T63	gadp	22.6692	T73	gadp	11.7756
		T3	gadp	24.9289054870605	T13	gadp	19.56	T23	gadp	19.19	T33	gadp	24.2779	T43	gadp	23.9779	T53	gadp	22.714	T53	gadp	22.914	T63	gadp	22.9463	T73	gadp	11.8122
		T3	gadp	24.8810691833496	T13	gadp	19.7167	T23	gadp	20.87	T33	gadp	24.2161	T43	gadp	23.9161	T53	gadp	22.5264	T53	gadp	22.7264	T63	gadp	22.9867	T73	gadp	11.7804
		P3	SPRED2	32.1818367004395	P13	SPRED2	32.7634	P23	SPRED2	32.891	P33	SPRED2	34.8815	P43	SPRED2	34.5815	P53	SPRED2	32.0668	P53	SPRED2	32.2668	P63	SPRED2	33.0332	P73	SPRED2	31.9258
		P3	SPRED2	32.4018367504395	P13	SPRED2	32.3975	P23	SPRED2	32.891	P33	SPRED2	35.4232	P43	SPRED2	35.1232	P53	SPRED2	33.5657	P53	SPRED2	33.7657	P63	SPRED2	32.2581	P73	SPRED2	32.3628
		P3	SPRED2	32.9813367004395	P13	SPRED2	32.4287	P23	SPRED2	32.891	P33	SPRED2	34.1158	P43	SPRED2	33.8158	P53	SPRED2	33.0711	P53	SPRED2	33.2711	P63	SPRED2	32.5689	P73	SPRED2	33.4703
		P3	gadp	25.1905174255371	P13	gadp	24.2824	P23	gadp	23.0152	P33	gadp	23.9649	P43	gadp	23.6649	P53	gadp	22.7692	P53	gadp	22.9692	P63	gadp	22.692	P73	gadp	13.5457
		P3	gadp	25.2128639221191	P13	gadp	22.9899	P23	gadp	23.0152	P33	gadp	23.9226	P43	gadp	23.6226	P53	gadp	23.0463	P53	gadp	23.2463	P63	gadp	22.6428	P73	gadp	13.4219
		P3	gadp	25.1083374023438	P13	gadp	22.8031	P23	gadp	23.0152	P33	gadp	23.9764	P43	gadp	23.6764	P53	gadp	23.0867	P53	gadp	23.2867	P63	gadp	22.6432	P73	gadp	13.5337
		T4	SPRED2	31.7362632751465	T14	SPRED2	30.9362	T24	SPRED2	31.4898	T34	SPRED2	31.2593	T44	SPRED2	30.9593	T54	SPRED2	33.1332	T54	SPRED2	33.3332	T64	SPRED2	33.3081	T74	SPRED2	31.9668
		T4	SPRED2	32.0818367004395	T14	SPRED2	31.1986	T24	SPRED2	31.4898	T34	SPRED2	31.0323	T44	SPRED2	30.7323	T54	SPRED2	32.3581	T54	SPRED2	32.5581	T64	SPRED2	33.468	T74	SPRED2	33.4657
		T4	SPRED2	31.0290260314941	T14	SPRED2	31.3833	T24	SPRED2	31.4898	T34	SPRED2	31.0882	T44	SPRED2	30.7882	T54	SPRED2	32.6689	T54	SPRED2	32.8689	T64	SPRED2	34.779	T74	SPRED2	32.9711
		T4	gadp	19.3184356689453	T14	gadp	17.5248	T24	gadp	20.9437	T34	gadp	17.5407	T44	gadp	17.2407	T54	gadp	22.792	T54	gadp	22.992	T64	gadp	23.0491	T74	gadp	23.124
		T4	gadp	19.2478313446045	T14	gadp	16.968	T24	gadp	20.0437	T34	gadp	17.6115	T44	gadp	17.3115	T54	gadp	22.7428	T54	gadp	22.9428	T64	gadp	23.3112	T74	gadp	23.3255
		T4	gadp	19.2945652008057	T14	gadp	17.5504	T24	gadp	20.9437	T34	gadp	17.539	T44	gadp	17.239	T54	gadp	22.7432	T54	gadp	22.9432	T64	gadp	23.3722	T74	gadp	23.4484
		P4	SPRED2	34.7098541259766	P14	SPRED2	32.797	P24	SPRED2	33.1969	P34	SPRED2	34.4094	P44	SPRED2	34.1094	P54	SPRED2	33.4081	P54	SPRED2	33.6081	P64	SPRED2	32.2323	P74	SPRED2	33.5977
		P4	SPRED2	34.5318984985352	P14	SPRED2	33.9229	P24	SPRED2	33.7969	P34	SPRED2	34.5645	P44	SPRED2	34.2645	P54	SPRED2	33.568	P54	SPRED2	33.768	P64	SPRED2	33.7645	P74	SPRED2	34.8995
		P4	SPRED2	Undetermined	P14	SPRED2	33.3316	P24	SPRED2	33.7969	P34	SPRED2	36.3333	P44	SPRED2	36.0333	P54	SPRED2	34.879	P54	SPRED2	35.079	P64	SPRED2	32.5333	P74	SPRED2	34.7165
		P4	gadp	25.4512920379639	P14	gadp	19.6852	P24	gadp	22.2507	P34	gadp	24.3512	P44	gadp	24.0512	P54	gadp	23.1491	P54	gadp	23.3491	P64	gadp	23.5512	P74	gadp	23.2868
		P4	gadp	25.4783935546875	P14	gadp	19.8098	P24	gadp	23.2507	P34	gadp	24.3525	P44	gadp	24.0525	P54	gadp	23.4112	P54	gadp	23.6112	P64	gadp	23.5525	P74	gadp	23.3224
		P4	gadp	25.5132293701172	P14	gadp	19.7493	P24	gadp	23.2507	P34	gadp	24.4591	P44	gadp	24.1591	P54	gadp	23.4722	P54	gadp	23.6722	P64	gadp	23.6591	P74	gadp	23.2999
		T5	SPRED2	33.3283004760742	T15	SPRED2	Undetermined	T25	SPRED2	33.5429	T35	SPRED2	31.9486	T45	SPRED2	32.2434	T55	SPRED2	33.2834	T55	SPRED2	33.4834	T65	SPRED2	31.8486	T75	SPRED2	33.5977
		T5	SPRED2	32.5303497314453	T15	SPRED2	29.4278	T25	SPRED2	32.1429	T35	SPRED2	32.6286	T45	SPRED2	31.5347	T55	SPRED2	Undetermined	T55	SPRED2	Undetermined	T65	SPRED2	31.1486	T75	SPRED2	33.8995
		T5	SPRED2	32.9322662353516	T15	SPRED2	30.4278	T25	SPRED2	33.5429	T35	SPRED2	32.6486	T45	SPRED2	33.2676	T55	SPRED2	34.7752	T55	SPRED2	34.9752	T65	SPRED2	30.8486	T75	SPRED2	33.7165
		T5	gadp	21.6635284423828	T15	gadp	23.4652	T25	gadp	23.1333	T35	gadp	20.62	T45	gadp	20.482	T55	gadp	26.5944	T55	gadp	26.7944	T65	gadp	19.89	T75	gadp	22.4778
		T5	gadp	21.5600242614746	T15	gadp	23.4473	T25	gadp	23.4123	T35	gadp	19.9	T45	gadp	20.2441	T55	gadp	26.5746	T55	gadp	26.7746	T65	gadp	19.19	T75	gadp	22.614
		T5	gadp	21.7166633605957	T15	gadp	23.0326	T25	gadp	23.4333	T35	gadp	19.99	T45	gadp	20.4438	T55	gadp	26.6334	T55	gadp	26.8334	T65	gadp	20.87	T75	gadp	22.4264
		P5	SPRED2	34.7634048461914	P15	SPRED2	33.4418	P25	SPRED2	34.3068	P35	SPRED2	33.691	P45	SPRED2	32.8505	P55	SPRED2	33.4152	P55	SPRED2	33.6152	P65	SPRED2	33.3081	P75	SPRED2	31.9668
		P5	SPRED2	34.3975448608398	P15	SPRED2	Undetermined	P25	SPRED2	34.1068	P35	SPRED2	32.991	P45	SPRED2	Undetermined	P55	SPRED2	33.3043	P55	SPRED2	33.5043	P65	SPRED2	33.468	P75	SPRED2	33.4657
		P5	SPRED2	34.4286766052246	P15	SPRED2	33.4278	P25	SPRED2	34.6832	P35	SPRED2	32.691	P45	SPRED2	33.9315	P55	SPRED2	34.0556	P55	SPRED2	34.2556	P65	SPRED2	34.779	P75	SPRED2	32.9711
		P5	gadp	26.2823944091797	P15	gadp	27.4585	P25	gadp	23.4547	P35	gadp	23.8152	P45	gadp	23.5535	P55	gadp	Undetermined	P55	gadp	Undetermined	P65	gadp	23.0491	P75	gadp	22.6692
		P5	gadp	24.9899463653564	P15	gadp	27.1888	P25	gadp	23.1247	P35	gadp	23.9252	P45	gadp	23.5645	P55	gadp	32.8996	P55	gadp	33.0996	P65	gadp	23.3112	P75	gadp	22.9463
		P5	gadp	24.8030548095703	P15	gadp	27.4568	P25	gadp	23.1547	P35	gadp	23.9152	P45	gadp	23.4277	P55	gadp	32.2121	P55	gadp	32.4121	P65	gadp	23.3722	P75	gadp	22.9867
		T6	SPRED2	32.9361801147461	T16	SPRED2	32.5964	T26	SPRED2	30.3266	T36	SPRED2	32.2898	T46	SPRED2	31.5936	T56	SPRED2	Undetermined	T56	SPRED2	Undetermined	T66	SPRED2	30.4593	T76	SPRED2	33.0332
		T6	SPRED2	33.1986465454102	T16	SPRED2	33.7018	T26	SPRED2	30.1266	T36	SPRED2	31.9898	T46	SPRED2	31.7919	T56	SPRED2	Undetermined	T56	SPRED2	Undetermined	T66	SPRED2	30.2323	T76	SPRED2	32.2581
		T6	SPRED2	33.3832511901855	T16	SPRED2	31.6361	T26	SPRED2	30.3266	T36	SPRED2	31.9998	T46	SPRED2	32.584	T56	SPRED2	Undetermined	T56	SPRED2	Undetermined	T66	SPRED2	30.2882	T76	SPRED2	32.5689
		T6	gadp	19.524772644043	T16	gadp	20.8153	T26	gadp	16.7637	T36	gadp	21.7437	T46	gadp	21.4817	T56	gadp	21.0587	T56	gadp	21.2587	T66	gadp	16.7407	T76	gadp	22.692
		T6	gadp	18.9680347442627	T16	gadp	20.406	T26	gadp	16.1637	T36	gadp	20.9037	T46	gadp	21.5454	T56	gadp	21.1953	T56	gadp	21.3953	T66	gadp	16.8115	T76	gadp	22.6428
		T6	gadp	19.5504360198975	T16	gadp	20.9928	T26	gadp	16.7637	T36	gadp	20.9437	T46	gadp	21.304	T56	gadp	21.1611	T56	gadp	21.3611	T66	gadp	16.739	T76	gadp	22.6432
		P6	SPRED2	34.7969818115234	P16	SPRED2	32.8206	P26	SPRED2	34.3024	P36	SPRED2	30.5469	P46	SPRED2	34.4726	P56	SPRED2	Undetermined	P56	SPRED2	Undetermined	P66	SPRED2	33.6094	P76	SPRED2	33.3081
		P6	SPRED2	35.922924041748	P16	SPRED2	34.7654	P26	SPRED2	33.3324	P36	SPRED2	30.5969	P46	SPRED2	Undetermined	P56	SPRED2	Undetermined	P56	SPRED2	Undetermined	P66	SPRED2	33.7645	P76	SPRED2	33.468
		P6	SPRED2	35.3316345214844	P16	SPRED2	35.6035	P26	SPRED2	34.1024	P36	SPRED2	31.5969	P46	SPRED2	34.1211	P56	SPRED2	Undetermined	P56	SPRED2	Undetermined	P66	SPRED2	35.5333	P76	SPRED2	34.779
		P6	gadp	21.6851863861084	P16	gadp	25.6579	P26	gadp	22.1876	P36	gadp	23.9507	P46	gadp	23.7341	P56	gadp	33.1698	P56	gadp	33.3698	P66	gadp	23.5512	P76	gadp	23.0491
		P6	gadp	21.8098125457764	P16	gadp	25.9278	P26	gadp	23.0876	P36	gadp	24.0507	P46	gadp	23.8121	P56	gadp	32.6415	P56	gadp	32.8415	P66	gadp	23.5525	P76	gadp	23.3112
		P6	gadp	21.7493419647217	P16	gadp	25.3613	P26	gadp	23.5866	P36	gadp	23.0507	P46	gadp	23.7059	P56	gadp	33.2483	P56	gadp	33.4483	P66	gadp	23.6591	P76	gadp	23.3722
		T7	SPRED2	30.5963859558105	T17	SPRED2	29.4111	T27	SPRED2	29.7363	T37	SPRED2	34.3429	T47	SPRED2	32.8574	T57	SPRED2	34.5907	T57	SPRED2	34.7907	T67	SPRED2	34.0815	T77	SPRED2	32.3505
		T7	SPRED2	30.1368859558105	T17	SPRED2	30.2228	T27	SPRED2	30.0818	T37	SPRED2	33.8429	T47	SPRED2	35.2285	T57	SPRED2	35.3002	T57	SPRED2	35.5002	T67	SPRED2	34.6232	T77	SPRED2	Undetermined
		T7	SPRED2	30.2963659558105	T17	SPRED2	30.9308	T27	SPRED2	29.029	T37	SPRED2	34.1429	T47	SPRED2	Undetermined	T57	SPRED2	33.7481	T57	SPRED2	33.9481	T67	SPRED2	33.3158	T77	SPRED2	33.4315
		T7	gadp	25.4652214050293	T17	gadp	19.0975	T27	gadp	17.3184	T37	gadp	23.9333	T47	gadp	23.9059	T57	gadp	11.8756	T57	gadp	12.0756	T67	gadp	23.1649	T77	gadp	23.0535
		T7	gadp	25.447338104248	T17	gadp	19.2622	T27	gadp	17.2478	T37	gadp	23.2333	T47	gadp	23.9779	T57	gadp	11.9122	T57	gadp	12.1122	T67	gadp	23.1226	T77	gadp	23.0645
		T7	gadp	25.0326480865479	T17	gadp	19.8752	T27	gadp	17.2946	T37	gadp	24.2333	T47	gadp	23.9161	T57	gadp	11.8804	T57	gadp	12.0804	T67	gadp	23.1764	T77	gadp	22.9277
		P7	SPRED2	34.6247572631836	P17	SPRED2	32.8475	P27	SPRED2	32.7099	P37	SPRED2	34.8068	P47	SPRED2	34.5815	P57	SPRED2	32.0258	P57	SPRED2	32.2258	P67	SPRED2	30.4593	P77	SPRED2	31.0936
		P7	SPRED2	35.1207572631836	P17	SPRED2	33.8847	P27	SPRED2	32.5319	P37	SPRED2	35.0068	P47	SPRED2	35.1232	P57	SPRED2	32.4628	P57	SPRED2	32.6628	P67	SPRED2	30.2323	P77	SPRED2	31.2919
		P7	SPRED2	35.4277572631836	P17	SPRED2	32.6797	P27	SPRED2	Undetermined	P37	SPRED2	34.9068	P47	SPRED2	33.8158	P57	SPRED2	33.5703	P57	SPRED2	33.7703	P67	SPRED2	30.2882	P77	SPRED2	32.084
		P7	gadp	29.4584636688232	P17	gadp	23.3367	P27	gadp	23.4513	P37	gadp	23.9547	P47	gadp	23.6649	P57	gadp	13.6457	P57	gadp	13.8457	P67	gadp	16.7407	P77	gadp	20.9817
		P7	gadp	29.1888198852539	P17	gadp	23.4255	P27	gadp	23.4784	P37	gadp	23.9247	P47	gadp	23.6226	P57	gadp	13.5219	P57	gadp	13.7219	P67	gadp	16.8115	P77	gadp	21.0454
		P7	gadp	29.4568176269531	P17	gadp	23.2527	P27	gadp	23.5132	P37	gadp	23.8547	P47	gadp	23.6764	P57	gadp	13.6337	P57	gadp	13.8337	P67	gadp	16.739	P77	gadp	20.804
		T8	SPRED2	34.5963859558105	T18	SPRED2	33.4725	T28	SPRED2	31.3283	T38	SPRED2	31.1266	T48	SPRED2	30.9593	T58	SPRED2	33.2619	T58	SPRED2	33.4619	T68	SPRED2	32.7099	T78	SPRED2	33.9726
		T8	SPRED2	35.7017860412598	T18	SPRED2	33.0844	T28	SPRED2	30.5303	T38	SPRED2	31.1466	T48	SPRED2	30.7323	T58	SPRED2	32.557	T58	SPRED2	32.757	T68	SPRED2	32.5319	T78	SPRED2	Undetermined
		T8	SPRED2	33.6361274719238	T18	SPRED2	31.3894	T28	SPRED2	30.9323	T38	SPRED2	30.1266	T48	SPRED2	30.7882	T58	SPRED2	32.1455	T58	SPRED2	32.3455	T68	SPRED2	Undetermined	T78	SPRED2	33.6211
		T8	gadp	22.8152980804443	T18	gadp	21.233	T28	gadp	19.6635	T38	gadp	16.9637	T48	gadp	17.2407	T58	gadp	13.5884	T58	gadp	13.7884	T68	gadp	23.4513	T78	gadp	23.2341
		T8	gadp	22.405969619751	T18	gadp	21.3445	T28	gadp	19.56	T38	gadp	17.5637	T48	gadp	17.3115	T58	gadp	13.4835	T58	gadp	13.6835	T68	gadp	23.4784	T78	gadp	23.3121
		T8	gadp	22.9927845001221	T18	gadp	21.2409	T28	gadp	19.7167	T38	gadp	16.5937	T48	gadp	17.239	T58	gadp	13.7596	T58	gadp	13.9596	T68	gadp	23.5132	T78	gadp	23.2059
		P8	SPRED2	34.8205795288086	P18	SPRED2	31.4792	P28	SPRED2	32.7634	P38	SPRED2	34.1024	P48	SPRED2	34.1094	P58	SPRED2	33.4447	P58	SPRED2	33.6447	P68	SPRED2	31.3283	P78	SPRED2	32.3574
		P8	SPRED2	36.7653694152832	P18	SPRED2	32.3063	P28	SPRED2	32.3975	P38	SPRED2	35.1024	P48	SPRED2	34.2645	P58	SPRED2	32.4682	P58	SPRED2	32.6682	P68	SPRED2	30.5303	P78	SPRED2	34.7285
		P8	SPRED2	37.6035041809082	P18	SPRED2	Undetermined	P28	SPRED2	32.4287	P38	SPRED2	34.9024	P48	SPRED2	36.0333	P58	SPRED2	Undetermined	P58	SPRED2	Undetermined	P68	SPRED2	30.9323	P78	SPRED2	Undetermined
		P8	gadp	27.6579055786133	P18	gadp	24.3059	P28	gadp	24.2824	P38	gadp	22.8876	P48	gadp	24.0512	P58	gadp	22.6602	P58	gadp	22.8602	P68	gadp	19.6635	P78	gadp	23.4059
		P8	gadp	27.9278182983398	P18	gadp	24.3139	P28	gadp	22.9899	P38	gadp	24.3876	P48	gadp	24.0525	P58	gadp	22.8349	P58	gadp	23.0349	P68	gadp	19.56	P78	gadp	23.4779
		P8	gadp	27.12278182983368	P18	gadp	24.0786	P28	gadp	22.8031	P38	gadp	24.1876	P48	gadp	24.1591	P58	gadp	22.7802	P58	gadp	22.9802	P68	gadp	19.7167	P78	gadp	23.4161
		T9	SPRED2	33.5110855102539	P19	SPRED2	31.7434	T29	SPRED2	30.9362	T39	SPRED2	31.8936	T49	SPRED2	34.5815	T59	SPRED2	30.4266	T59	SPRED2	32.7911	T69	SPRED2	32.7634	T79	SPRED2	33.6094
		T9	SPRED2	32.4228401184082	P19	SPRED2	31.0347	T29	SPRED2	31.1986	T39	SPRED2	32.0919	T49	SPRED2	35.1232	T59	SPRED2	30.4466	T59	SPRED2	32.7011	T69	SPRED2	32.3975	T79	SPRED2	33.7645
		T9	SPRED2	32.2308311462402	P19	SPRED2	32.7676	T29	SPRED2	31.3833	T39	SPRED2	32.884	T49	SPRED2	33.8158	T59	SPRED2	29.4266	T59	SPRED2	32.4911	T69	SPRED2	32.4287	T79	SPRED2	35.5333
		T9	gadp	22.1974868774414	P19	gadp	19.982	T29	gadp	17.5248	T39	gadp	21.7817	T49	gadp	23.6649	T59	gadp	16.2637	T59	gadp	20.4469	T69	gadp	24.2824	T79	gadp	23.5512
		T9	gadp	21.6621780395508	P19	gadp	19.7441	T29	gadp	16.968	T39	gadp	21.8454	T49	gadp	23.6226	T59	gadp	16.8637	T59	gadp	19.9469	T69	gadp	22.9899	T79	gadp	23.5525
		T9	gadp	21.8751850128174	P19	gadp	19.9438	T29	gadp	17.5504	T39	gadp	21.604	T49	gadp	23.6764	T59	gadp	15.8937	T59	gadp	20.9469	T69	gadp	22.8031	T79	gadp	23.6591
		P9	SPRED2	31.8475036621094	T19	SPRED2	32.3505	P29	SPRED2	32.797	P39	SPRED2	34.7726	P49	SPRED2	30.9593	P59	SPRED2	33.4024	P59	SPRED2	33.6647	P69	SPRED2	30.9362	P79	SPRED2	31.4792
		P9	SPRED2	36.8847160339355	T19	SPRED2	Undetermined	P29	SPRED2	33.9229	P39	SPRED2	Undetermined	P49	SPRED2	30.7323	P59	SPRED2	34.4024	P59	SPRED2	32.4647	P69	SPRED2	31.1986	P79	SPRED2	32.3063
		P9	SPRED2	34.6797294616699	T19	SPRED2	33.4315	P29	SPRED2	33.3316	P39	SPRED2	34.4211	P49	SPRED2	30.7882	P59	SPRED2	34.2024	P59	SPRED2	33.6647	P69	SPRED2	31.3833	P79	SPRED2	Undetermined
		P9	gadp	25.3366565704346	T19	gadp	23.0535	P29	gadp	19.6852	P39	gadp	24.0341	P49	gadp	17.2407	P59	gadp	22.1876	P59	gadp	20.3563	P69	gadp	17.5248	P79	gadp	24.3059
		P9	gadp	25.4255180358887	T19	gadp	23.0645	P29	gadp	19.8098	P39	gadp	24.1121	P49	gadp	17.3115	P59	gadp	23.6876	P59	gadp	19.4563	P69	gadp	16.968	P79	gadp	24.3139
		P9	gadp	25.2526607513428	T19	gadp	22.9277	P29	gadp	19.7493	P39	gadp	24.0059	P49	gadp	17.239	P59	gadp	23.4876	P59	gadp	20.3563	P69	gadp	17.5504	P79	gadp	24.0786
		T10	SPRED2	35.4725112915039	T20	SPRED2	31.0936	T30	SPRED2	29.8475	T40	SPRED2	33.1574	T50	SPRED2	34.1094	T60	SPRED2	31.0362	T60	SPRED2	32.1012	T70	SPRED2	32.797	T80	SPRED2	33.0332
		T10	SPRED2	35.0844192504883	T20	SPRED2	31.2919	T30	SPRED2	34.8847	T40	SPRED2	35.5285	T50	SPRED2	34.2645	T60	SPRED2	31.2986	T60	SPRED2	32.4012	T70	SPRED2	33.9229	T80	SPRED2	32.2581
		T10	SPRED2	33.3894348144531	T20	SPRED2	32.084	T30	SPRED2	32.6797	T40	SPRED2	Undetermined	T50	SPRED2	36.0333	T60	SPRED2	31.4833	T60	SPRED2	32.4012	T70	SPRED2	33.3316	T80	SPRED2	32.5689
		T10	gadp	23.2330150604248	T20	gadp	20.9817	T30	gadp	23.3367	T40	gadp	24.2059	T50	gadp	24.0512	T60	gadp	17.6248	T60	gadp	23.5193	T70	gadp	19.6852	T80	gadp	22.692
		T10	gadp	23.3444976806641	T20	gadp	21.0454	T30	gadp	23.4255	T40	gadp	24.2779	T50	gadp	24.0525	T60	gadp	17.068	T60	gadp	23.4993	T70	gadp	19.8098	T80	gadp	22.6428
		T10	gadp	23.2409057617188	T20	gadp	20.804	T30	gadp	23.2527	T40	gadp	24.2161	T50	gadp	24.1591	T60	gadp	17.6504	T60	gadp	23.5993	T70	gadp	19.7493	T80	gadp	22.6432
		P10	SPRED2	33.4792022705078	P20	SPRED2	33.9726	P30	SPRED2	33.4725	P40	SPRED2	34.8815	P50	SPRED2	31.9792	P60	SPRED2	32.897	P60	SPRED2	34.4046	P70	SPRED2	33.9726	P80	SPRED2	33.3081
		P10	SPRED2	34.3062744140625	P20	SPRED2	Undetermined	P30	SPRED2	33.0844	P40	SPRED2	35.4232	P50	SPRED2	32.8063	P60	SPRED2	34.0229	P60	SPRED2	34.7046	P70	SPRED2	Undetermined	P80	SPRED2	33.468
		P10	SPRED2	Undetermined	P20	SPRED2	33.6211	P30	SPRED2	31.3894	P40	SPRED2	34.1158	P50	SPRED2	Undetermined	P60	SPRED2	33.4316	P60	SPRED2	34.5044	P70	SPRED2	33.6211	P80	SPRED2	34.779
		P10	gadp	26.3058528900146	P20	gadp	23.2341	P30	gadp	21.233	P40	gadp	23.9649	P50	gadp	24.8059	P60	gadp	19.7852	P60	gadp	22.603	P70	gadp	23.2341	P80	gadp	23.0491
		P10	gadp	26.3139190673828	P20	gadp	23.3121	P30	gadp	21.3445	P40	gadp	23.9226	P50	gadp	24.8139	P60	gadp	19.9098	P60	gadp	23.403	P70	gadp	23.3121	P80	gadp	23.3112
		P10	gadp	26.0785827636719	P20	gadp	23.2059	P30	gadp	21.2409	P40	gadp	23.9764	P50	gadp	24.5786	P60	gadp	19.8493	P60	gadp	23.603	P70	gadp	23.2059	P80	gadp	23.3722
Figure 5C(Relative enrichment of circCOPA)
	LM3		IgG	HNRNPD			IgG	HNRNPD
			31.7936	31.7815			33.0936317443847	33.0815
			31.9919	32.3232			33.2919425964355	33.6232
			31.784	31.0158	Figure 5D(Relative enrichment of circCOPA)		33.0839538574218	32.3158
		GAPDH	19.6817	23.8649		GAPDH	20.9816627502441	25.1649322509766							1.7
		GAPDH	18.7454	23.8226		GAPDH	20.0453968048095	25.1226234436035
		GAPDH	19.504	23.8764		GAPDH	20.8040447235107	25.1764144897461
			32.7936	32.2111			34.0936317443847	33.5110855102539
			32.9919	30.9284			34.2919425964355	32.228401184082
			31.784	30.8308			33.0839538574218	32.1308311462402
		GAPDH	20.6817	21.8975	Hep-3B	GAPDH	21.9816627502441	23.1974868774414
		GAPDH	19.7454	21.8975		GAPDH	21.0453968048095	23.1974868774414
		GAPDH	21.504	22.3622		GAPDH	22.8040447235107	23.6621780395508
			34.6726	30.7815			35.9726371765137	32.0815200805664
			Undetermined	31.3232			Undetermined	32.6231956481934
			34.3211	31.0158			35.6211242675781	32.3157768249512
		GAPDH	20.9341	23.8649		GAPDH	22.2341117858887	25.1649322509766
		GAPDH	21.0121	23.6026		GAPDH	22.3121013641357	24.9026234436035
		GAPDH	20.9059	23.8764		GAPDH	22.2058658599854	25.1764144897461
		IgG	WT	R2	R1	del-R1+2		WT	R2	R1	del-R1+2
			33.0936317443847	32.9936	30.5815	33.0815		31.0936	31.1936	29.0815	31.0815
Figure 5G(Relative enrichment of circCOPA)			33.2919425964355	33.1919	31.1232	33.6232		31.2919	31.3919	29.6232	31.6232
			33.0839538574218	32.984	29.8158	32.3158	FLAG	31.084	31.184	28.3158	30.3158
		GAPDH	20.9816627502441	20.8817	22.6649	25.1649322509766		18.9817	19.0817	21.1649	23.1649	GAPDH
		GAPDH	20.0453968048095	19.9454	22.6226	25.1226234436035		18.0454	18.1454	21.1226	23.1226	GAPDH
		GAPDH	20.8040447235107	20.704	22.6764	25.1764144897461		18.804	18.904	21.1764	23.1764	GAPDH
			34.0936317443847	33.9936	31.0111	33.5110855102539		32.0936	32.1936	29.5111	31.5111
			34.2919425964355	34.1919	29.7284	32.228401184082		32.2919	32.3919	28.2284	30.2284
			33.0839538574218	32.984	29.6308	32.1308311462402		31.084	31.184	28.1308	30.1308
		GAPDH	21.9816627502441	21.8817	20.6975	23.1974868774414		19.9817	20.0817	19.1975	21.1975	GAPDH
		GAPDH	21.0453968048095	20.9454	20.6975	23.1974868774414		19.0454	19.1454	19.1975	21.1975	GAPDH
		GAPDH	22.8040447235107	22.704	21.1622	23.6621780395508		20.804	20.904	19.6622	21.6622	GAPDH
			35.9726371765137	35.8726	29.5815	32.0815200805664		33.9726	34.0726	28.0815	30.0815
			Undetermined	Undetermined	30.1232	32.6231956481934		Undetermined	Undetermined	28.6232	30.6232
			35.6211242675781	35.5211	29.8158	32.3157768249512		33.6211	33.7211	28.3158	30.3158
		GAPDH	22.2341117858887	22.1341	22.6649	25.1649322509766		20.2341	20.3341	21.1649	23.1649	GAPDH
		GAPDH	22.3121013641357	22.2121	22.4026	24.9026234436035		20.3121	20.4121	20.9026	22.9026	GAPDH
		GAPDH	22.2058658599854	22.1059	22.6764	25.1764144897461		20.2059	20.3059	21.1764	23.1764	GAPDH
		circCOPA	sh-NC	sh-circCOPA	Vector	circCOPA-OE		HNRNPD	sh-NC	sh-circCOPA	Vector	circCOPA-OE
		circ	31.5936	32.3024	33.0815	33.0815		HNRNPD	30.1936	31.4936	31.4815	31.4815
Figure 5I(Relative Exprssion)		circ	31.7919	33.3024	33.6232	33.6232		HNRNPD	30.3919	31.6919	32.0232	32.0232
		circ	31.584	33.1024	32.3158	32.3158		HNRNPD	30.184	31.484	30.7158	30.7158
		gadp	21.4817	21.0876	22.1649	22.1649		gadp	20.0817	21.3817	20.5649	20.5649
		gadp	20.5454	22.5876	22.1226	22.1226		gadp	19.1454	20.4454	20.5226	20.5226
		gadp	21.304	22.3876	22.1764	22.1764		gadp	19.904	21.204	20.5764	20.5764
		circ	29.5936	30.5111	30.7434	30.5111		HNRNPD	28.1936	29.4936	29.1434	28.9111
		circ	29.7919	29.2284	30.0347	29.2284		HNRNPD	28.3919	29.6919	28.4347	27.6284
		circ	29.584	29.1308	30.7676	29.1308		HNRNPD	28.184	29.484	29.1676	27.5308
		gadp	20.4817	18.1975	19.982	18.1975		gadp	19.0817	20.3817	18.382	16.5975
LM3		gadp	19.5454	18.1975	19.7441	18.1975		gadp	18.1454	19.4454	18.1441	16.5975
		gadp	21.304	18.6622	19.9438	18.6622		gadp	19.904	21.204	18.3438	17.0622
		circ	34.4726	32.0815	29.3266	32.0815		HNRNPD	33.0726	34.3726	27.7266	30.4815
		circ	Undetermined	32.6232	29.3466	32.6232		HNRNPD	Undetermined	Undetermined	27.7466	31.0232
		circ	34.1211	31.3158	28.3266	31.3158		HNRNPD	32.7211	34.0211	26.7266	29.7158
		gadp	23.7341	22.1649	15.1637	22.1649		gadp	22.3341	23.6341	13.5637	20.5649
		gadp	23.8121	21.9026	15.7637	21.9026		gadp	22.4121	23.7121	14.1637	20.3026
		gadp	23.7059	22.1764	14.7937	22.1764		gadp	22.3059	23.6059	13.1937	20.5764
		HNRNPD	SI-NC	SI-HNRNPD-1	SI-HNRNPD-2	circCOPA-OE	SI-NC	SI-HNRNPD-1	SI-HNRNPD-2		HNRNPD	Vector	HNRNPD-OE		circCOPA-OE	Vector	HNRNPD-OE
		HNRNPD	30.0936	29.7434	30.6094	circ	34.2815	33.2815	34.1726		HNRNPD	33.0936317443847	34.7098541259766		circ	33.6815	30.3434
Figure 5J(Relative Exprssion)		HNRNPD	30.2919	29.0347	30.7645	circ	34.8232	33.8232	Undetermined		HNRNPD	33.2919425964355	34.5318984985352		circ	34.2232	29.6347
		HNRNPD	30.084	29.7676	30.5333	circ	33.5158	33.5158	33.8211		HNRNPD	33.0839538574218	Undetermined		circ	32.9158	30.3676
		gadp	19.9817	19.982	19.5512	gadp	23.3649	23.3649	22.4341		gadp	22.9816627502441	25.4512920379639		gadp	22.7649	20.582
	LM3	gadp	19.0454	19.7441	19.5525	gadp	23.3226	23.3226	22.5121	Figure 5K(Relative Exprssion)	gadp	22.0453968048095	25.4783935546875		gadp	22.7226	20.3441
		gadp	19.804	19.9438	19.6591	gadp	23.3764	23.3764	22.4059		gadp	22.8040447235107	25.5132293701172		gadp	22.7764	20.5438
		HNRNPD	28.0936	29.3505	30.0815	circ	31.7111	30.6593	32.5574		HNRNPD	31.0936317443847	33.3283004760742		circ	31.1111	30.9505
		HNRNPD	28.2919	Undetermined	30.6232	circ	30.4284	30.4323	32.9285		HNRNPD	31.2919425964355	32.5303497314453		circ	29.8284	Undetermined
		HNRNPD	28.084	29.4315	30.3158	circ	30.3308	30.4882	Undetermined		HNRNPD	31.0839538574218	32.9322662353516		circ	29.7308	31.0315
		gadp	18.9817	19.0535	18.1649	gadp	19.3975	20.9407	21.6059		gadp	21.9816627502441	24.6635284423828		gadp	18.7975	19.6535
		gadp	18.0454	19.0645	19.1226	gadp	19.3975	20.0115	21.6779		gadp	21.0453968048095	24.5600242614746		gadp	18.7975	19.6645
		gadp	19.804	19.9277	19.1764	gadp	19.8622	20.939	21.6161		gadp	22.8040447235107	24.7166633605957		gadp	19.2622	20.5277
		HNRNPD	32.9726	28.0936	30.3505	circ	33.2815	Undetermined	31.2815		HNRNPD	35.9726371765137	34.7634048461914		circ	32.6815	30.6936
		HNRNPD	Undetermined	28.2919	Undetermined	circ	33.8232	31.9996	31.8232		HNRNPD	Undetermined	34.3975448608398		circ	33.2232	30.8919
		HNRNPD	32.6211	28.084	30.4315	circ	32.5158	31.3121	31.5158		HNRNPD	35.6211242675781	34.4286766052246		circ	31.9158	30.684
		gadp	22.2341	17.9817	19.0535	gadp	23.3649	20.1587	20.3649		gadp	25.2341117858887	25.2823944091796		gadp	22.7649	20.5817
		gadp	22.3121	17.0454	19.0645	gadp	23.1026	19.2953	21.3226		gadp	25.3121013641357	25.9899463653564		gadp	22.5026	19.6454
		gadp	22.2059	17.804	19.9277	gadp	23.3764	19.2611	21.3764		gadp	25.2058658599854	25.8030548095703		gadp	22.7764	20.404
		HNRNPD	SI-NC	SI-HNRNPD-1	SI-HNRNPD-2	SPRED2	SI-NC	SI-HNRNPD-1	SI-HNRNPD-2		HNRNPD	SI-NC	SI-HNRNPD-1	SI-HNRNPD-2	SPRED2	SI-NC	SI-HNRNPD-1	SI-HNRNPD-2
Figure 6A(Relative Exprssion)		HNRNPD	30.0936	29.7434	30.6094	SPRED2	31.7815	30.7815	31.6726		HNRNPD	28.8936	28.5434	29.4094	SPRED2	30.7815	29.7815	30.6726
		HNRNPD	30.2919	29.0347	30.7645	SPRED2	32.3232	31.3232	Undetermined		HNRNPD	29.0919	27.8347	29.5645	SPRED2	31.3232	30.3232	Undetermined
		HNRNPD	30.084	29.7676	30.5333	SPRED2	31.0158	31.0158	31.3211		HNRNPD	28.884	28.5676	29.3333	SPRED2	30.0158	30.0158	30.3211
		gadp	19.9817	19.982	19.5512	gadp	20.8649	20.8649	19.9341		gadp	18.7817	18.782	18.3512	gadp	19.8649	19.8649	18.9341
	LM3	gadp	19.0454	19.7441	19.5525	gadp	20.8226	20.8226	20.0121	Figure 6B(Relative Exprssion)	gadp	17.8454	18.5441	18.3525	gadp	19.8226	19.8226	19.0121
		gadp	19.804	19.9438	19.6591	gadp	20.8764	20.8764	19.9059		gadp	18.604	18.7438	18.4591	gadp	19.8764	19.8764	18.9059
		HNRNPD	28.0936	29.3505	30.0815	SPRED2	29.2111	28.1593	30.0574		HNRNPD	26.8936	28.1505	28.8815	SPRED2	28.2111	27.1593	29.0574
		HNRNPD	28.2919	Undetermined	30.6232	SPRED2	27.9284	27.9323	30.4285		HNRNPD	27.0919	Undetermined	29.4232	SPRED2	26.9284	26.9323	29.4285
		HNRNPD	28.084	29.4315	30.3158	SPRED2	27.8308	27.9882	Undetermined		HNRNPD	26.884	28.2315	29.1158	SPRED2	26.8308	26.9882	Undetermined
		gadp	18.9817	19.0535	18.1649	gadp	16.8975	18.4407	19.1059		gadp	17.7817	17.8535	16.9649	gadp	15.8975	17.4407	18.1059
		gadp	18.0454	19.0645	19.1226	gadp	16.8975	17.5115	19.1779		gadp	16.8454	17.8645	17.9226	gadp	15.8975	16.5115	18.1779
		gadp	19.804	19.9277	19.1764	gadp	17.3622	18.439	19.1161		gadp	18.604	18.7277	17.9764	gadp	16.3622	17.439	18.1161
		HNRNPD	32.9726	28.0936	30.3505	SPRED2	30.7815	Undetermined	28.7815		HNRNPD	31.7726	26.8936	29.1505	SPRED2	29.7815	Undetermined	27.7815
		HNRNPD	Undetermined	28.2919	Undetermined	SPRED2	31.3232	29.4996	29.3232		HNRNPD	Undetermined	27.0919	Undetermined	SPRED2	30.3232	28.4996	28.3232
		HNRNPD	32.6211	28.084	30.4315	SPRED2	30.0158	28.8121	29.0158		HNRNPD	31.4211	26.884	29.2315	SPRED2	29.0158	27.8121	28.0158
		gadp	22.2341	17.9817	19.0535	gadp	20.8649	17.6587	17.8649		gadp	21.0341	16.7817	17.8535	gadp	19.8649	16.6587	16.8649
		gadp	22.3121	17.0454	19.0645	gadp	20.6026	16.7953	18.8226		gadp	21.1121	15.8454	17.8645	gadp	19.6026	15.7953	17.8226
		gadp	22.2059	17.804	19.9277	gadp	20.8764	16.7611	18.8764		gadp	21.0059	16.604	18.7277	gadp	19.8764	15.7611	17.8764
		SI-NC	0H	2H	4H	SI-circCOPA-1	0H	2H	4H	SI-circCOPA-2	0H	2H	4H			circCOPA+si-NC	0H	2H	4H	circCOPA+si-HNRNPD	0H	2H	4H	Vector+si-NC	0H	2H	4H
		SPRED2	28.8936	28.5434	29.4094		30.4815	29.4815	30.3726		27.5936	27.2434	28.1094			SPRED2	30.6936	30.3434	31.2094		30.8815	29.8815	30.7726		27.1936	26.8434	27.7094
		SPRED2	29.0919	27.8347	29.5645		31.0232	30.0232	Undetermined		27.7919	26.5347	28.2645			SPRED2	30.8919	29.6347	31.3645		31.4232	30.4232	Undetermined		27.3919	26.1347	27.8645
Figure 6F(SPRED2 mRNA Remaining (REF. to 0H))		SPRED2	28.884	28.5676	29.3333		29.7158	29.7158	30.0211		27.584	27.2676	28.0333			SPRED2	30.684	30.3676	31.1333		30.1158	30.1158	30.4211		27.184	26.8676	27.6333
		gadp	18.7817	18.782	18.3512		19.5649	19.5649	18.6341		17.4817	17.482	17.0512			gadp	20.5817	20.582	20.1512		19.9649	19.9649	19.0341		17.0817	17.082	16.6512
		gadp	17.8454	18.5441	18.3525		19.5226	19.5226	18.7121		16.5454	17.2441	17.0525			gadp	19.6454	20.3441	20.1525		19.9226	19.9226	19.1121		16.1454	16.8441	16.6525
	LM3	gadp	18.604	18.7438	18.4591		19.5764	19.5764	18.6059		17.304	17.4438	17.1591	Figure 6G(SPRED2 mRNA Remaining (REF. to 0H))		gadp	20.404	20.5438	20.2591		19.9764	19.9764	19.0059		16.904	17.0438	16.7591
		SPRED2	26.8936	28.1505	28.8815		27.9111	26.8593	28.7574		25.5936	26.8505	27.5815			SPRED2	28.6936	29.9505	30.6815		28.3111	27.2593	29.1574		25.1936	26.4505	27.1815
		SPRED2	27.0919	Undetermined	29.4232		26.6284	26.6323	29.1285		25.7919	Undetermined	28.1232			SPRED2	28.8919	Undetermined	31.2232		27.0284	27.0323	29.5285		25.3919	Undetermined	27.7232
		SPRED2	26.884	28.2315	29.1158		26.5308	26.6882	Undetermined		25.584	26.9315	27.8158		LM3	SPRED2	28.684	30.0315	30.9158		26.9308	27.0882	Undetermined		25.184	26.5315	27.4158
		gadp	17.7817	17.8535	16.9649		15.5975	17.1407	17.8059		16.4817	16.5535	15.6649			gadp	19.5817	19.6535	18.7649		15.9975	17.5407	18.2059		16.0817	16.1535	15.2649
		gadp	16.8454	17.8645	17.9226		15.5975	16.2115	17.8779		15.5454	16.5645	16.6226			gadp	18.6454	19.6645	19.7226		15.9975	16.6115	18.2779		15.1454	16.1645	16.2226
		gadp	18.604	18.7277	17.9764		16.0622	17.139	17.8161		17.304	17.4277	16.6764			gadp	20.404	20.5277	19.7764		16.4622	17.539	18.2161		16.904	17.0277	16.2764
		SPRED2	31.7726	26.8936	29.1505		29.4815	Undetermined	27.4815		30.4726	25.5936	27.8505			SPRED2	33.5726	28.6936	30.9505		29.8815	Undetermined	27.8815		30.0726	25.1936	27.4505
		SPRED2	Undetermined	27.0919	Undetermined		30.0232	28.1996	28.0232		Undetermined	25.7919	Undetermined			SPRED2	Undetermined	28.8919	Undetermined		30.4232	28.5996	28.4232		Undetermined	25.3919	Undetermined
		SPRED2	31.4211	26.884	29.2315		28.7158	27.5121	27.7158		30.1211	25.584	27.9315			SPRED2	33.2211	28.684	31.0315		29.1158	27.9121	28.1158		29.7211	25.184	27.5315
		gadp	21.0341	16.7817	17.8535		19.5649	16.3587	16.5649		19.7341	15.4817	16.5535			gadp	22.8341	18.5817	19.6535		19.9649	16.7587	16.9649		19.3341	15.0817	16.1535
		gadp	21.1121	15.8454	17.8645		19.3026	15.4953	17.5226		19.8121	14.5454	16.5645			gadp	22.9121	17.6454	19.6645		19.7026	15.8953	17.9226		19.4121	14.1454	16.1645
		gadp	21.0059	16.604	18.7277		19.5764	15.4611	17.5764		19.7059	15.304	17.4277			gadp	22.8059	18.404	20.5277		19.9764	15.8611	17.9764		19.3059	14.904	17.0277
			sh-NC-IgG	sh-NC-HNRNPD	sh-circCOPA-IgG	sh-circCOPA-HNRNPD				Vector-IgG	Vector-HNRNPD	circCOPA-IgG	circCOPA-HNRNPD
		SPRED2	30.2936	30.2815	31.5936	31.5815			SPRED2	29.4936	29.4815	30.7936	30.7815
		SPRED2	30.4919	30.8232	31.7919	32.1232			SPRED2	29.6919	30.0232	30.9919	31.3232
Figure 6H(Relative enrichment of SPRED2 mRNA REF.to input ))		SPRED2	30.284	29.5158	31.584	30.8158			SPRED2	29.484	28.7158	30.784	30.0158
		gadp	18.1817	22.3649	19.4817	23.6649	Figure 6H(Relative enrichment of SPRED2 mRNA REF.to input ))		gadp	17.3817	21.5649	18.6817	22.8649
		gadp	17.2454	22.3226	18.5454	23.6226			gadp	16.4454	21.5226	17.7454	22.8226
	LM3	gadp	18.004	22.3764	19.304	23.6764			gadp	17.204	21.5764	18.504	22.8764
		SPRED2	31.2936	30.7111	32.5936	32.0111		LM3	SPRED2	30.4936	29.9111	31.7936	31.2111
		SPRED2	31.4919	29.4284	32.7919	30.7284			SPRED2	30.6919	28.6284	31.9919	29.9284
		SPRED2	30.284	29.3308	31.584	30.6308			SPRED2	29.484	28.5308	30.784	29.8308
		gadp	19.1817	20.3975	20.4817	21.6975			gadp	18.3817	19.5975	19.6817	20.8975
		gadp	18.2454	20.3975	19.5454	21.6975			gadp	17.4454	19.5975	18.7454	20.8975
		gadp	20.004	20.8622	21.304	22.1622			gadp	19.204	20.0622	20.504	21.3622
		SPRED2	33.1726	29.2815	34.4726	30.5815			SPRED2	32.3726	28.4815	33.6726	29.7815
		SPRED2	Undetermined	29.8232	Undetermined	31.1232			SPRED2	Undetermined	29.0232	Undetermined	30.3232
		SPRED2	32.8211	29.5158	34.1211	30.8158			SPRED2	32.0211	28.7158	33.3211	30.0158
		gadp	19.4341	22.3649	20.7341	23.6649			gadp	18.6341	21.5649	19.9341	22.8649
		gadp	19.5121	22.1026	20.8121	23.4026			gadp	18.7121	21.3026	20.0121	22.6026
		gadp	19.4059	22.3764	20.7059	23.6764			gadp	18.6059	21.5764	19.9059	22.8764
		IgG	HNRNPD	IgG	HNRNPD	IgG	HNRNPD		Motif 3	0H	2H	4H	Motif 3 MUT	0H	2H	4H
		30.2936	30.5936	30.5936	30.5936	30.5936	30.7815		SPRED2	28.3936	28.0434	28.9094		29.9815	28.9815	29.8726
		30.4919	30.7919	30.7919	30.7919	30.7919	31.3232		SPRED2	28.5919	27.3347	29.0645		30.5232	29.5232	Undetermined
Figure 6K(Fold Enrichment of Motifs (normalized to input)))		30.284	30.584	30.584	30.584	30.584	30.0158		SPRED2	28.384	28.0676	28.8333		29.2158	29.2158	29.5211
		20.1817	20.4817	20.4817	20.4817	20.4817	22.8649		gadp	18.2817	18.282	17.8512		19.0649	19.0649	18.1341
		19.2454	19.5454	19.5454	19.5454	19.5454	22.8226		gadp	17.3454	18.0441	17.8525		19.0226	19.0226	18.2121
		20.004	20.304	20.304	20.304	20.304	22.8764		gadp	18.104	18.2438	17.9591		19.0764	19.0764	18.1059
		28.2936	28.5936	28.5936	28.5936	28.5936	31.2111	Figure 6M(SPRED2 mRNA Remaining (REF. to 0H)))	SPRED2	26.3936	27.6505	28.3815		27.4111	26.3593	28.2574
		28.4919	28.7919	28.7919	28.7919	28.7919	29.9284		SPRED2	26.5919	Undetermined	28.9232		26.1284	26.1323	28.6285
		28.284	28.584	28.584	28.584	28.584	29.8308		SPRED2	26.384	27.7315	28.6158		26.0308	26.1882	Undetermined
		19.1817	19.4817	19.4817	19.4817	19.4817	20.8975		gadp	17.2817	17.3535	16.4649		15.0975	16.6407	17.3059
		18.2454	18.5454	18.5454	18.5454	18.5454	20.8975		gadp	16.3454	17.3645	17.4226		15.0975	15.7115	17.3779
		20.004	20.304	20.304	20.304	20.304	21.3622		gadp	18.104	18.2277	17.4764		15.5622	16.639	17.3161
		33.1726	33.4726	33.4726	33.4726	33.4726	29.7815		SPRED2	31.2726	26.3936	28.6505		28.9815	Undetermined	26.9815
		Undetermined	Undetermined	Undetermined	Undetermined	Undetermined	30.3232		SPRED2	Undetermined	26.5919	Undetermined		29.5232	27.6996	27.5232
		32.8211	33.1211	33.1211	33.1211	33.1211	30.0158		SPRED2	30.9211	26.384	28.7315		28.2158	27.0121	27.2158
		22.4341	22.7341	22.7341	22.7341	22.7341	22.8649		gadp	20.5341	16.2817	17.3535		19.0649	15.8587	16.0649
		22.5121	22.8121	22.8121	22.8121	22.8121	22.6026		gadp	20.6121	15.3454	17.3645		18.8026	14.9953	17.0226
		22.4059	22.7059	22.7059	22.7059	22.7059	22.8764		gadp	20.5059	16.104	18.2277		19.0764	14.9611	17.0764
