# Supplementary material
Source: Research Square preprint supplement (doi:10.21203/rs.3.rs-9321668/v1)
Supplement: Supplementary file 1 [file 577297727b75055ae0923db2.pdf]

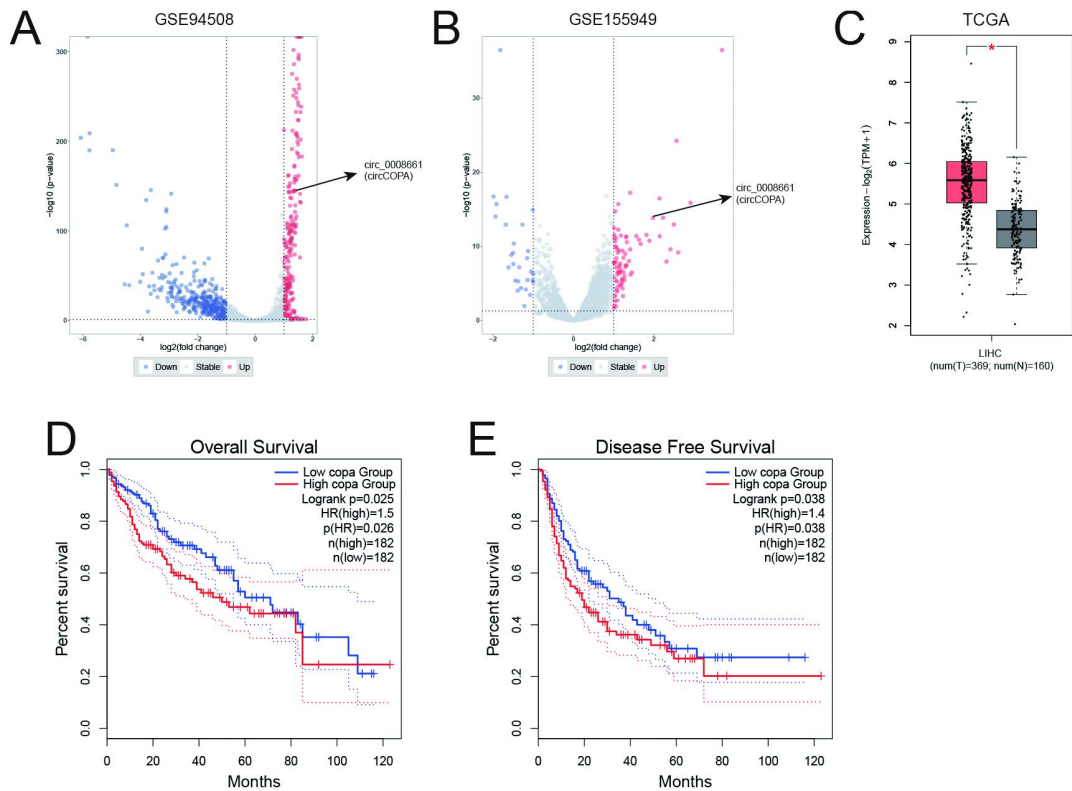

1

2 **Fig. S1 Identification and characterization of circCOPA in HCC.** (A) Volcano  
 3 plot showing circCOPA expression in the GSE94508 dataset. (B) Volcano plot  
 4 showing circCOPA expression in the GSE155949 dataset. (C) COPA expression  
 5 levels in liver hepatocellular carcinoma (LIHC) based on TCGA data (tumor tissues, n  
 6 = 369; adjacent non-tumor tissues, n = 160). (D) Overall survive analysis of HCC  
 7 patients stratified by COPA expression levels based on TCGA data. (F) Disease-free  
 8 survive analysis of HCC patients stratified by COPA expression levels based on  
 9 TCGA data.

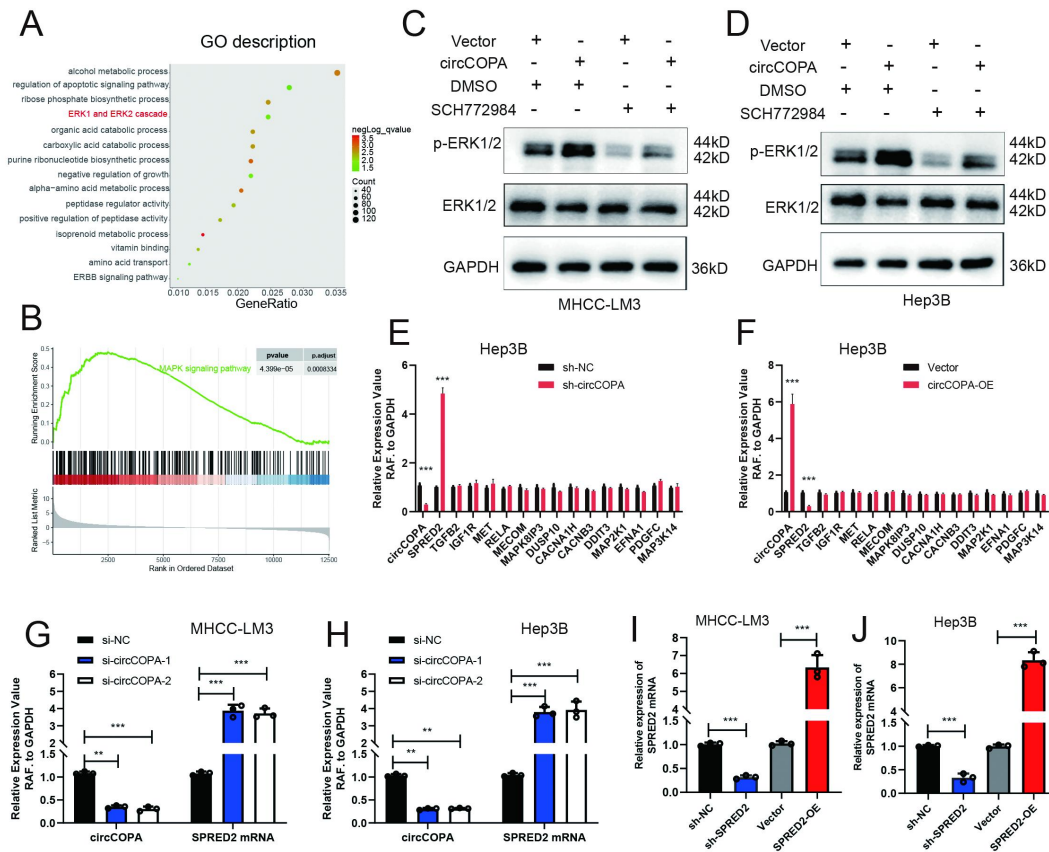

10

11 **Fig. S2 circCOPA activates the ERK/MAPK pathway by downregulating**  
 12 **SPRED2.** (A) Gene Ontology (GO) enrichment analysis of differentially expressed  
 13 genes identified from RNA-seq data. (B) GSEA plot showing activation of MAPK  
 14 signaling pathway in Hep3B cells with circCOPA overexpression. (C,D) Western blot  
 15 analysis of total ERK1/2, and phosphorylated ERK1/2 (p-ERK1/2) levels in  
 16 MHCC-LM3 and Hep3B cells. (E,F) qRT-PCR analysis of the 15 candidate genes in  
 17 Hep3B cells following circCOPA knockdown or overexpression. (G,H) qRT-PCR  
 18 analysis of SPRED2 mRNA expression levels following circCOPA knockdown in  
 19 MHCC-LM3 and Hep3B cells. (I,J) qRT-PCR validation of stable SPRED2  
 20 knockdown and overexpression efficiency in MHCC-LM3 and Hep3B cells. Data are  
 21 presented as mean±SD of three independent experiments. \*\* $p < 0.01$ , \*\*\* $p < 0.001$ .

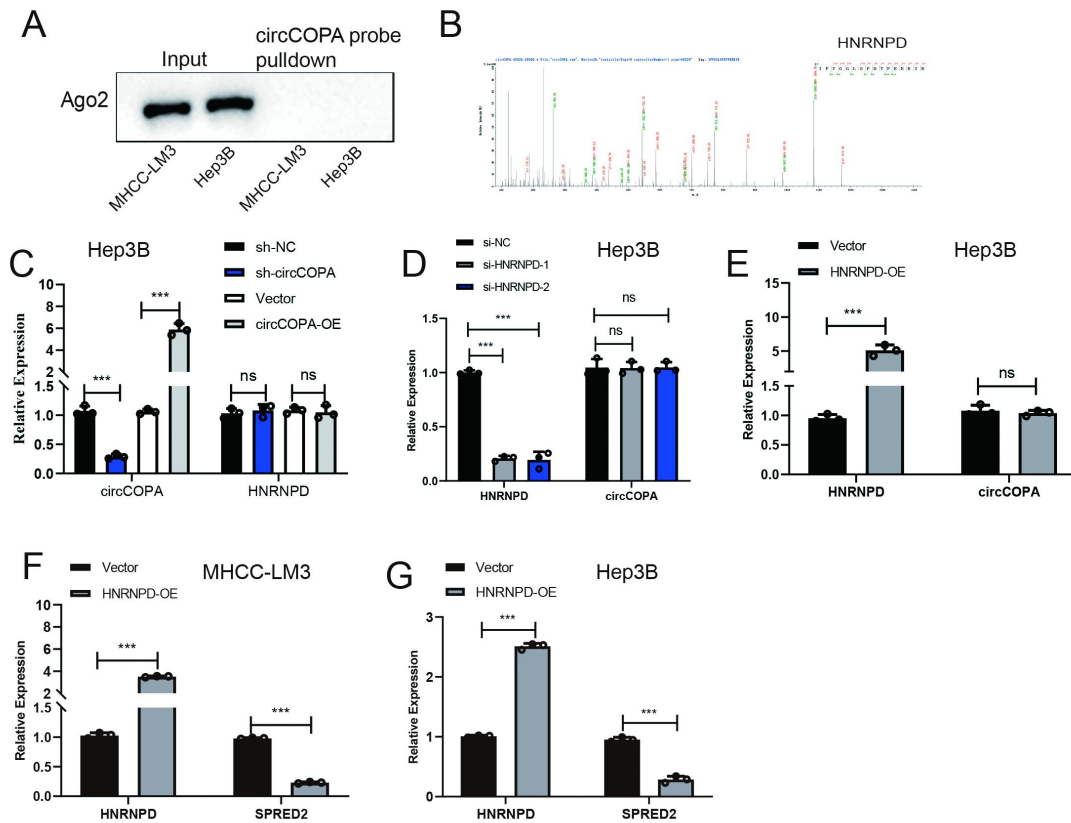

22

23 **Fig. S3 circCOPA directly interacts with HNRNP D protein in HCC cells.** (A)  
 24 Western blot analysis of Ago2 protein levels following RNA pulldown using  
 25 circCOPA-specific probes in MHCC-LM3 and Hep3B cells. (B) Mass spectrometry  
 26 identification of HNRNP D from circCOPA pulldown samples. (C) qRT-PCR analysis  
 27 of HNRNP D mRNA following stable circCOPA knockdown or overexpression in  
 28 Hep3B cells. (D, E) qRT-PCR analysis of circCOPA following HNRNP D knockdown  
 29 or overexpression in Hep3B cells. (F, G) qRT-PCR analysis of SPRED2 mRNA levels  
 30 following HNRNP D overexpression in MHCC-LM3 and Hep3B cells. Data are  
 31 presented as mean±SD of three independent experiments. \*\*\* $p$ <0.001.

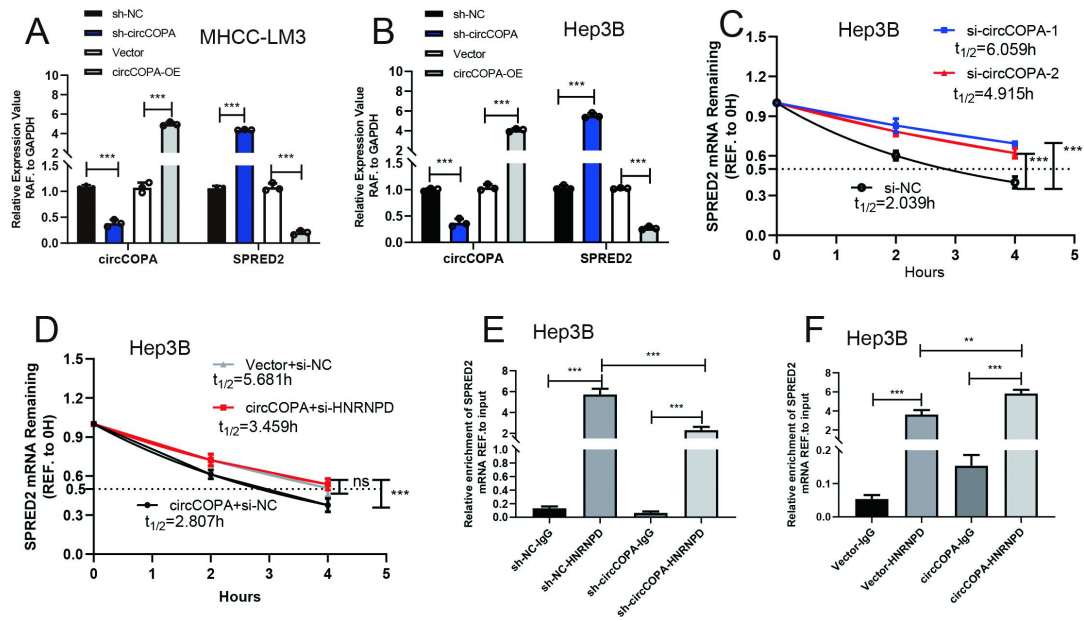

32

33 **Fig. S4 circCOPA promotes SPRED2 mRNA decay in an HNRNPD-dependent**  
 34 **manner.** (A,B) qRT-PCR analysis of SPRED2 mRNA expression levels after stable  
 35 circCOPA knockdown or overexpression in MHCC-LM3 and Hep3B cells. (C)  
 36 SPRED2 mRNA stability was assessed by qRT-PCR at specific time points after  
 37 actinomycin D treatment (10  $\mu$ g/mL) in Hep3B cells with circCOPA knockdown. (D)  
 38 SPRED2 mRNA stability was measured by qRT-PCR at specific time points following  
 39 actinomycin D treatment (10 $\mu$ g/mL) in Hep3B cells with circCOPA overexpression  
 40 alone or in combination with HNRNPD knockdown. (E,F) HNRNPD RIP assays  
 41 were performed in Hep3B cells with circCOPA knockdown or overexpression,  
 42 followed by qRT-PCR analysis of SPRED2 mRNA enrichment. Data are presented as  
 43 mean $\pm$ SD of three independent experiments. \*\* $p$ <0.01, \*\*\* $p$ <0.001.

44

45

46

47

48

49

50

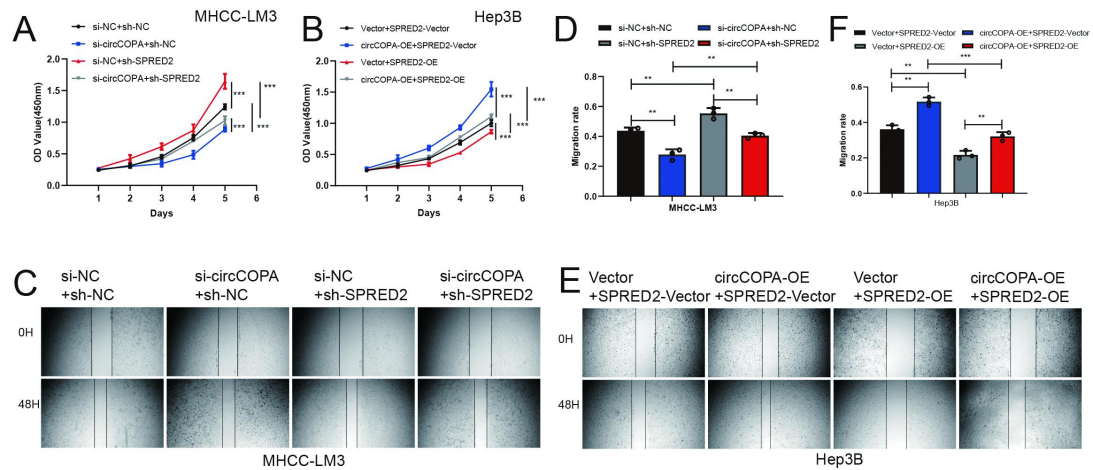

51

52 **Fig. S5 The circCOPA-SPRED2 axis drives HCC malignancy.** (A,B) Rescue  
 53 experiments based on CCK-8 assays were performed in circCOPA and  
 54 SPRED2-modulated MHCC-LM3 or Hep3B cells. (C,D) Rescue experiments based  
 55 on wound-healing assays were performed in circCOPA and SPRED2-modulated  
 56 MHCC-LM3 cells. (E,F) Rescue experiments based on wound-healing assays were  
 57 performed in circCOPA and SPRED2-modulated Hep3B cells. Data are presented as  
 58 mean±SD of three independent experiments. \*\* $p < 0.01$ , \*\*\* $p < 0.001$ .

59

60

61

62

63

64

65

66

67

68

69

70

71

72

73

74

75

76

77

78

79

80

81

82

83

84 **Supplementary Table S1.** The correlation between circCOPA expression and HCC  
 85 patients' clinicopathological characteristics.

| Characteristics |           | circCOPA Expression |          | P value |
|-----------------|-----------|---------------------|----------|---------|
|                 |           | High (40)           | Low (40) |         |
| Gender          | Male      | 23                  | 26       | 0.491   |
|                 | Female    | 17                  | 14       |         |
| Age(Years)      | <60       | 22                  | 19       | 0.502   |
|                 | ≥60       | 18                  | 21       |         |
| Liver cirrhosis | Yes       | 18                  | 23       | 0.263   |
|                 | No        | 22                  | 17       |         |
| AFP             | ≤200ng/ml | 12                  | 15       | 0.478   |
|                 | >200ng/ml | 28                  | 25       |         |
| HbsAg           | Positive  | 28                  | 21       | 0.108   |
|                 | Negative  | 12                  | 19       |         |
| Tumor Size      | <5cm      | 8                   | 21       | 0.002** |
|                 | ≥5cm      | 32                  | 19       |         |
| Tumor Stage     | I         | 11                  | 23       | 0.007** |
|                 | II-III    | 29                  | 17       |         |
| Edmondson grade | I-II      | 10                  | 21       | 0.012*  |
|                 | III-IV    | 30                  | 19       |         |

86 \*P<0.05, \*\*P<0.01

87  
 88  
 89  
 90  
 91  
 92  
 93  
 94  
 95  
 96  
 97  
 98  
 99  
 100  
 101  
 102  
 103  
 104  
 105  
 106  
 107  
 108  
 109

110 **Supplementary Table S2.** Primer sequence of qRT-PCR used in this study

| Gene       | Forward Primer        | Reverse Primer           |
|------------|-----------------------|--------------------------|
| circCOPA   | GGCAGTGGAGCCATATCTCTG | CTACCCCAAAGCCTCCAAGTT    |
| GAPDH      | TCCAAAATCAAGTGGGGCGA  | AAATGAGCCCCAGCCTTCTC     |
| U6         | CTCGCTTCGGCAGCACA     | AACGCTTCACGAATTTGCGT     |
| COPA       | TATGCTGGCACAGGCAATCT  | ATCACAATGGCGTGTTTGGC     |
| Divergent  | ATCGTGGAGTAAACTGGGCTG | TCTTCTGTGGGGTGGAACTG     |
| Convergent | CAGTTCCACCCACAGAAGA   | GAAATATCCCAAACGCGCACA    |
| SPRED2     | GCCACCTCCACGACTCATAAC | GGTAATCCTCGTACCCCGTC     |
| HNRNPD     | GCGTGGGTCTGCTTTATTACC | TTGCTGATATTGTTCCCTTCGACA |

111  
112  
113  
114  
115  
116  
117  
118  
119  
120  
121  
122  
123  
124  
125  
126  
127  
128  
129  
130  
131  
132  
133  
134  
135  
136  
137  
138  
139  
140  
141  
142  
143  
144

145

**Supplementary Table S2.** Sequence of sh/si-RNAs used in this study

|                      |                                                                |
|----------------------|----------------------------------------------------------------|
| si-circCOPA-1        | UCUGGCGCAUGAAUGUGUGTT                                          |
| si-circCOPA-2        | CUGGCGCAUGAAUGUGUGUTT                                          |
| si-circCOPA-3        | UGGCGCAUGAAUGUGUGUUTT                                          |
| si-circCOPA-NC       | ACGTGCCACATGGTCGACGT                                           |
| sh-circCOPA-1        | TTCATATGACCAGTGGACATGAAA                                       |
| sh-circCOPA-2        | TATGACCAGTGGACATGAAAGATCA                                      |
| sh-circCOPA-NC       | ACGTCTGCCACATGGTCGACGT                                         |
| si-HNRNPD-1          | AAUGUUGGUCUUAGUAAAUGU                                          |
| si-HNRNPD-2          | GUUGUAGACUGCACUCUGA                                            |
| si-HNRNPD-NC         | ACGTGCCAGGTCCTGACGT                                            |
| sh-SPRED2-1          | TGCTGTTGACAGTGAGCGACTCAGAAGAGAGCAACCTTAG<br>TGAAGCCACAGATGTA   |
| sh-SPRED2-2          | TGCTGTTGACAGTGAGCGAGCATGCTCTATCACTGTATGTAGT<br>GAAGCCACAGATGTA |
| sh-SPRED2-NC         | ACGTGCCACCTATCACTGTATGATGGTCGACGT                              |
| circCOPA-probe       | TGGACTGCTTCTTGCTCTGTTGTTC -/3bio/                              |
| circCOPA-NC-probe    | GAACAACAGAGCAAGAAGCAGTCCA- /3bio/                              |
| circCOPA-probe(FISH) | /5CY3/-GAACAACAGAGCAAGAAGCAGTCCA                               |

146

147

148

149

150

151

152

153

154

155

156

157

158

159

160

161

162

163

164

165

166

167

168

**Supplementary Table S3. Antibodies used in this study**

| Antibody            | Source                    | Cat no.      |
|---------------------|---------------------------|--------------|
| HNRNPD (WB)         | ABclonal                  | Cat#A15679   |
| HNRNPD (RIP)        | ABclonal                  | Cat#A15679   |
| HNRNPD (IF)         | ABclonal                  | Cat#A15679   |
| Anti-JNK            | Abcam                     | ab199380     |
| Anti-p-JNK          | Abcam                     | ab215208     |
| Anti-p38            | Abcam                     | ab170099     |
| Anti-Phospho-p38    | Abcam                     | ab195049     |
| Anti-ERK1/2         | Abcam                     | ab184699     |
| Anti-Phospho-ERK1/2 | Cell Signaling Technology | 4370         |
| Anti-MEK1/2         | Proteintech               | 11049-1-AP   |
| Anti-Phospho-MEK1/2 | Abclonal                  | AP0209       |
| Anti-GAPDH          | Servicebio                | GB15004-100  |
| Anti-SPRED2         | Proteintech               | 24091-1-AP   |
| Flag-tag (WB)       | Sigma-Aldrich             | Cat#F3165    |
| Ki67 (IHC)          | Servicebio                | Cat#GB111499 |
| Anti-IgG Control    | Proteintech               | 30000-0-AP   |
