# Supplementary material
Source: Research Square preprint supplement (doi:10.21203/rs.3.rs-9321668/v1)
Supplement: Supplementary file 2 [file eec4eee62040b5b2eb7292d3.xlsx]

## Sheet: circCOPA
Table S4. Mass spectrometry (MS) analysis results following circCOPA probe pulldown.
Protein IDs	Majority protein IDs	Protein names	Gene names	Fasta headers	Number of proteins	Peptides	Razor + unique peptides	Unique peptides	Sequence coverage [%]	Mol. weight [kDa]	Sequence length	Score	Intensity	iBAQ peptides	iBAQ
B4E0W4;H0YA96;A0A994J440;H0Y8G5;Q12771;B4DTC3;A0A994J4R1;Q14103;D6RF44;D6RAF8	B4E0W4;H0YA96;A0A994J440;H0Y8G5;Q12771;B4DTC3;A0A994J4R1;Q14103;D6RF44;D6RAF8	cDNA FLJ61020, highly similar to Heterogeneous nuclear ribonucleoprotein D0;Heterogeneous nuclear ribonucleoprotein D (Fragment);	;HNRNPD	tr|B4E0W4|B4E0W4_HUMAN cDNA FLJ61020, highly similar to Heterogeneous nuclear ribonucleoprotein D0 OS=Homo sapiens OX=9606 PE=2 SV=1;tr|H0YA96|H0YA96_HUMAN Heterogeneous nuclear ribonucleoprotein D (Fragment) OS=Homo sapiens OX=9606 GN=HNRNPD PE=1 SV=1;tr|	10	4	4	4	21.9	22.962	201	98.014	516480000	8	20652000
G3V279;P84090	G3V279;P84090	Enhancer of rudimentary homolog	ERH	tr|G3V279|G3V279_HUMAN Enhancer of rudimentary homolog OS=Homo sapiens OX=9606 GN=ERH PE=1 SV=1;sp|P84090|ERH_HUMAN Enhancer of rudimentary homolog OS=Homo sapiens OX=9606 GN=ERH PE=1 SV=1	2	1	1	1	22.5	8.2033	71	96.29	160030000	4	23502000
A1A508;Q86W20;A6XGL3;Q8N2U3;A0A7P0MNE9;E7EQ64;P07477;P35030;Q9BYE2	A1A508;Q86W20;A6XGL3;Q8N2U3;A0A7P0MNE9;E7EQ64;P07477;P35030;Q9BYE2	PRSS3 protein;Protease serine 1 (Fragment);Protease serine 1	PRSS3;PRSS1	tr|A1A508|A1A508_HUMAN PRSS3 protein OS=Homo sapiens OX=9606 GN=PRSS3 PE=2 SV=1;tr|Q86W20|Q86W20_HUMAN Protease serine 1 (Fragment) OS=Homo sapiens OX=9606 GN=PRSS1 PE=4 SV=1;tr|A6XGL3|A6XGL3_HUMAN Protease serine 1 OS=Homo sapiens OX=9606 GN=PRSS1 PE=1 SV	9	2	2	1	8.5	26.487	247	67.898	401010000	13	30847000
A0A1W2PP22;A0A994J6V2;Q96BA7;A0A1W2PP35;A0A1X7SBS1;B3KX72;B4DLR3;A0A1W2PPS1;Q00839	A0A1W2PP22;A0A994J6V2;Q96BA7;A0A1W2PP35;A0A1X7SBS1;B3KX72;B4DLR3;A0A1W2PPS1;Q00839	Heterogeneous nuclear ribonucleoprotein U (Fragment);	HNRNPU;	tr|A0A1W2PP22|A0A1W2PP22_HUMAN Heterogeneous nuclear ribonucleoprotein U (Fragment) OS=Homo sapiens OX=9606 GN=HNRNPU PE=1 SV=1;tr|A0A994J6V2|A0A994J6V2_HUMAN Heterogeneous nuclear ribonucleoprotein U (Fragment) OS=Homo sapiens OX=9606 GN=HNRNPU PE=1 SV=1;	9	1	1	1	9.9	19.643	181	20.441	19356000	5	3871200
Q6E433;Q6IBA2;Q59G24;P53999;B7Z1Z0	Q6E433;Q6IBA2;Q59G24;P53999;B7Z1Z0	Activated RNA polymerase II transcriptional coactivator p15 (Fragment);Activated RNA polymerase II transcriptional coactivator p15;	;PC4	tr|Q6E433|Q6E433_HUMAN Activated RNA polymerase II transcriptional coactivator p15 (Fragment) OS=Homo sapiens OX=9606 PE=2 SV=1;tr|Q6IBA2|Q6IBA2_HUMAN Activated RNA polymerase II transcriptional coactivator p15 OS=Homo sapiens OX=9606 GN=PC4 PE=2 SV=1;tr|Q	5	2	2	2	13.7	8.6549	73	13.569	45179000	5	4062800
B3KX15;J3QL05;Q6NXQ0;Q8N220;B3KVY2;B3KUF7;Q8NAK9;B3KUY1;J3KP15;Q53FN0;Q01130;Q9BRL6	B3KX15;J3QL05;Q6NXQ0;Q8N220;B3KVY2;B3KUF7;Q8NAK9;B3KUY1;J3KP15;Q53FN0;Q01130;Q9BRL6	cDNA FLJ44468 fis, clone UTERU2026025, moderately similar to SPLICING FACTOR, ARGININE/SERINE-RICH 2;Serine and arginine rich splicing factor 2 (Fragment)		tr|B3KX15|B3KX15_HUMAN cDNA FLJ44468 fis, clone UTERU2026025, moderately similar to SPLICING FACTOR, ARGININE/SERINE-RICH 2 OS=Homo sapiens OX=9606 PE=2 SV=1;tr|J3QL05|J3QL05_HUMAN Serine and arginine rich splicing factor 2 (Fragment) OS=Homo sapiens OX=96	12	1	1	1	6.6	13.814	122	13.418	0	10	0
B4DJK0;Q59EK7;A8K644;Q59EF5;Q53F45;A0A0D9SEM4;V9HVZ0;B4DUA4;A8K588;Q59GY3;A0A590UJP7;A0A590UK01;A0A590UJK4;B4DEM8;A0A590UK80;Q13247;Q13243;Q08170	B4DJK0;Q59EK7;A8K644;Q59EF5;Q53F45;A0A0D9SEM4;V9HVZ0;B4DUA4;A8K588;Q59GY3;A0A590UJP7;A0A590UK01;A0A590UJK4;B4DEM8;A0A590UK80;Q13247;Q13243;Q08170	Serine and arginine rich splicing factor 5;CS0DF038YO05 variant (Fragment);	SRSF5;	tr|B4DJK0|B4DJK0_HUMAN Serine and arginine rich splicing factor 5 OS=Homo sapiens OX=9606 GN=SRSF5 PE=1 SV=1;tr|Q59EK7|Q59EK7_HUMAN CS0DF038YO05 variant (Fragment) OS=Homo sapiens OX=9606 PE=4 SV=1;tr|A8K644|A8K644_HUMAN Splicing factor, arginine/serine-ri	18	1	1	1	7.3	14.437	124	11.443	16433000	8	2054100
A0A087X2D0;B2R6F3;P84103	A0A087X2D0;B2R6F3;P84103	Serine and arginine rich splicing factor 3;Epididymis secretory sperm binding protein;	SRSF3;SFRS3;	tr|A0A087X2D0|A0A087X2D0_HUMAN Serine and arginine rich splicing factor 3 OS=Homo sapiens OX=9606 GN=SRSF3 PE=1 SV=1;tr|B2R6F3|B2R6F3_HUMAN Epididymis secretory sperm binding protein OS=Homo sapiens OX=9606 GN=SFRS3 PE=2 SV=1;sp|P84103|SRSF3_HUMAN Serine/a	3	1	1	1	9.5	10.32	95	11.373	27629000	8	3453600
A0A7I2V497;A0A7I2V459;A0A7I2V3W0;A0A024RB53;Q6IPF2;A0A7I2V3R8;F8W6I7;Q9BSM5;A0A7I2YQX9;B4E0B5;B4DP35;H0YH80;Q3MI39;A0A7I2V360;A0A7I2V2M7;A0A7I2V4F8;A0A7I2V520;A0A7I2YQY2;A0A7I2V2Q7;A0A7I2V334;A0A7I2V453;A0A7I2V2R4;A0A7I2V3K5;A0A7I2V666;A0A7I2V5P1;A0A7I2V661;A0A7I2V4E2;A0A7I2V2X1;A0A7I2V4P7;A0A7I2V5N7;A0A7I2V2F1;A0A7I2V3U8;P09651	A0A7I2V497;A0A7I2V459;A0A7I2V3W0;A0A024RB53;Q6IPF2;A0A7I2V3R8;F8W6I7;Q9BSM5;A0A7I2YQX9;B4E0B5;B4DP35;H0YH80;Q3MI39;A0A7I2V360;A0A7I2V2M7;A0A7I2V4F8;A0A7I2V520;A0A7I2YQY2;A0A7I2V2Q7;A0A7I2V334;A0A7I2V453;A0A7I2V2R4;A0A7I2V3K5;A0A7I2V666;A0A7I2V5P1;A0A7I2V661;A0A7I2V4E2;A0A7I2V2X1;A0A7I2V4P7;A0A7I2V5N7;A0A7I2V2F1;A0A7I2V3U8;P09651	Heterogeneous nuclear ribonucleoprotein A1 (Fragment)	HNRNPA1	tr|A0A7I2V497|A0A7I2V497_HUMAN Heterogeneous nuclear ribonucleoprotein A1 (Fragment) OS=Homo sapiens OX=9606 GN=HNRNPA1 PE=1 SV=1;tr|A0A7I2V459|A0A7I2V459_HUMAN Heterogeneous nuclear ribonucleoprotein A1 (Fragment) OS=Homo sapiens OX=9606 GN=HNRNPA1 PE=1 S	33	1	1	1	50	3.1353	32	11.101	35015000	1	35015000
Q9BSV4;Q86VG2;A0A384N5Z8;A0A8Q3WMA7;P23246	Q9BSV4;Q86VG2;A0A384N5Z8;A0A8Q3WMA7;P23246	SFPQ protein (Fragment);Splicing factor proline/glutamine-rich (Polypyrimidine tract binding protein associated);	SFPQ;	tr|Q9BSV4|Q9BSV4_HUMAN SFPQ protein (Fragment) OS=Homo sapiens OX=9606 GN=SFPQ PE=2 SV=2;tr|Q86VG2|Q86VG2_HUMAN Splicing factor proline/glutamine-rich (Polypyrimidine tract binding protein associated) OS=Homo sapiens OX=9606 GN=SFPQ PE=2 SV=1;tr|A0A384N5Z8	5	1	1	1	2.4	68.63	634	10.07	18464000	31	595610
Q4VB24;B2R984;A3R0T8;A3R0T7;P16403;P10412;P16402	Q4VB24;B2R984;A3R0T8;A3R0T7;P16403;P10412;P16402	Histone cluster 1, H1e;cDNA, FLJ94268, highly similar to Homo sapiens histone 1, H1e (HIST1H1E), mRNA;	HIST1H1E;	tr|Q4VB24|Q4VB24_HUMAN Histone cluster 1, H1e OS=Homo sapiens OX=9606 GN=HIST1H1E PE=2 SV=1;tr|B2R984|B2R984_HUMAN cDNA, FLJ94268, highly similar to Homo sapiens histone 1, H1e (HIST1H1E), mRNA OS=Homo sapiens OX=9606 PE=2 SV=1;tr|A3R0T8|A3R0T8_HUMAN Histo	7	1	1	1	4.6	21.893	219	9.2735	16264000	12	1355300
L0R8D2	L0R8D2	Alternative protein RCOR1	RCOR1	tr|L0R8D2|L0R8D2_HUMAN Alternative protein RCOR1 OS=Homo sapiens OX=9606 GN=RCOR1 PE=4 SV=1	1	1	1	1	14.5	7.6918	69	7.7973	0	6	0
A0A8I5KW20;A0A8I5KU25;A0A8I5QKK4;A0A8I5KSV3;A0A8I5KVX9;A0A8I5QJ69;A0A8I5KYV8;A0A8I5KQ98;A0A8I5KTE5;A0A8I5QKX6;A0A8I5KXF8;A0A8I5KQH9;A0A8I5KSF0;A0A8I5KWY9;Q08378	A0A8I5KW20;A0A8I5KU25;A0A8I5QKK4;A0A8I5KSV3;A0A8I5KVX9;A0A8I5QJ69;A0A8I5KYV8;A0A8I5KQ98;A0A8I5KTE5;A0A8I5QKX6;A0A8I5KXF8;A0A8I5KQH9;A0A8I5KSF0;A0A8I5KWY9;Q08378	Golgin A3 (Fragment)	GOLGA3;	tr|A0A8I5KW20|A0A8I5KW20_HUMAN Golgin A3 (Fragment) OS=Homo sapiens OX=9606 GN=GOLGA3 PE=1 SV=1;tr|A0A8I5KU25|A0A8I5KU25_HUMAN Golgin A3 (Fragment) OS=Homo sapiens OX=9606 GN=GOLGA3 PE=1 SV=1;tr|A0A8I5QKK4|A0A8I5QKK4_HUMAN Golgin A3 (Fragment) OS=Homo sapi	15	1	1	1	1	80.107	724	7.4736	885880000	43	20602000
A0N4V7;A0A075B6Z2	A0N4V7;A0A075B6Z2	HCG2039797 (Fragment);T cell receptor alpha joining 56 (Fragment)	Tcr-alpha;TRAJ56	tr|A0N4V7|A0N4V7_HUMAN HCG2039797 (Fragment) OS=Homo sapiens OX=9606 GN=Tcr-alpha PE=4 SV=1;tr|A0A075B6Z2|A0A075B6Z2_HUMAN T cell receptor alpha joining 56 (Fragment) OS=Homo sapiens OX=9606 GN=TRAJ56 PE=4 SV=1	2	1	1	1	38.1	2.2136	21	7.1196	29993000000	2	14997000000
L0R599	L0R599	Alternative protein CIRH1A	CIRH1A	tr|L0R599|L0R599_HUMAN Alternative protein CIRH1A OS=Homo sapiens OX=9606 GN=CIRH1A PE=4 SV=1	1	1	1	1	23.1	7.695	65	7.0241	22357000	4	5589200
M0R1H6;M0QZC5;P62280	M0R1H6;M0QZC5;P62280	Ribosomal protein S11;Small ribosomal subunit protein uS17	RPS11;	tr|M0R1H6|M0R1H6_HUMAN Ribosomal protein S11 OS=Homo sapiens OX=9606 GN=RPS11 PE=1 SV=1;tr|M0QZC5|M0QZC5_HUMAN Ribosomal protein S11 OS=Homo sapiens OX=9606 GN=RPS11 PE=1 SV=1;sp|P62280|RS11_HUMAN Small ribosomal subunit protein uS17 OS=Homo sapiens OX=960	3	1	1	1	14.8	10.123	88	6.8982	18435000	7	2633500
A6NCI4	A6NCI4	von Willebrand factor A domain-containing protein 3A	VWA3A	sp|A6NCI4|VWA3A_HUMAN von Willebrand factor A domain-containing protein 3A OS=Homo sapiens OX=9606 GN=VWA3A PE=1 SV=3	1	1	1	1	0.5	134.02	1184	6.8244	34059000	69	493610
Q4G1A1	Q4G1A1	DSN1 protein	DSN1	tr|Q4G1A1|Q4G1A1_HUMAN DSN1 protein OS=Homo sapiens OX=9606 GN=DSN1 PE=2 SV=1	1	1	1	1	5.9	38.295	340	6.7899	9936100000	23	432000000
Q7Z5F4	Q7Z5F4	Protease serine 4 isoform B		tr|Q7Z5F4|Q7Z5F4_HUMAN Protease serine 4 isoform B OS=Homo sapiens OX=9606 PE=2 SV=1	1	2	1	1	16.5	28.199	261	6.7336	1308900000	13	100680000
Q6ZVL3;B4E244;B3KY47;A0A2R8Y5P9;Q8TF72	Q6ZVL3;B4E244;B3KY47;A0A2R8Y5P9;Q8TF72	cDNA FLJ42424 fis, clone BLADE2004089, moderately similar to Mus musculus PDZ domain actin binding protein Shroom mRNA (Fragment);		tr|Q6ZVL3|Q6ZVL3_HUMAN cDNA FLJ42424 fis, clone BLADE2004089, moderately similar to Mus musculus PDZ domain actin binding protein Shroom mRNA (Fragment) OS=Homo sapiens OX=9606 PE=2 SV=1;tr|B4E244|B4E244_HUMAN cDNA FLJ55531, highly similar to Homo sapiens	5	1	1	1	1.1	87.857	809	6.4509	47432000	53	894950
A0A804HKK1;B3KWS8;A0A804HL06;A0A804HIB6;A0A1B1SMR9;P20849	A0A804HKK1;B3KWS8;A0A804HL06;A0A804HIB6;A0A1B1SMR9;P20849	Collagen type IX alpha 1 chain (Fragment);cDNA FLJ43750 fis, clone TESTI2034767, highly similar to Collagen alpha-1(IX) chain	COL9A1;	tr|A0A804HKK1|A0A804HKK1_HUMAN Collagen type IX alpha 1 chain (Fragment) OS=Homo sapiens OX=9606 GN=COL9A1 PE=4 SV=1;tr|B3KWS8|B3KWS8_HUMAN cDNA FLJ43750 fis, clone TESTI2034767, highly similar to Collagen alpha-1(IX) chain OS=Homo sapiens OX=9606 PE=2 SV=	6	1	1	1	11.5	5.154	52	6.1886	27576000	3	9191900
Q8N1H0	Q8N1H0	cDNA FLJ25625 fis, clone STM02974		tr|Q8N1H0|Q8N1H0_HUMAN cDNA FLJ25625 fis, clone STM02974 OS=Homo sapiens OX=9606 PE=2 SV=1	1	1	1	1	4.2	20.991	190	6.1602	0	13	0
B4DEM9;Q9Y2S7	B4DEM9;Q9Y2S7	DNA polymerase delta interacting protein 2;Polymerase delta-interacting protein 2	POLDIP2	tr|B4DEM9|B4DEM9_HUMAN DNA polymerase delta interacting protein 2 OS=Homo sapiens OX=9606 GN=POLDIP2 PE=1 SV=1;sp|Q9Y2S7|PDIP2_HUMAN Polymerase delta-interacting protein 2 OS=Homo sapiens OX=9606 GN=POLDIP2 PE=1 SV=1	2	1	1	1	1.7	39.871	350	6.1258	563580	24	23483
A0A087X256;B7ZKT9;Q2M389	A0A087X256;B7ZKT9;Q2M389	WASH complex subunit 4;KIAA1033 protein	WASHC4;KIAA1033;	tr|A0A087X256|A0A087X256_HUMAN WASH complex subunit 4 OS=Homo sapiens OX=9606 GN=WASHC4 PE=1 SV=1;tr|B7ZKT9|B7ZKT9_HUMAN KIAA1033 protein OS=Homo sapiens OX=9606 GN=KIAA1033 PE=2 SV=1;sp|Q2M389|WASC4_HUMAN WASH complex subunit 4 OS=Homo sapiens OX=9606 GN=	3	1	1	1	0.9	136.5	1174	6.0922	0	73	0
C9JLM6;B8ZZ95;A0A384P602;A8MX15;Q96G27	C9JLM6;B8ZZ95;A0A384P602;A8MX15;Q96G27	WW domain binding protein 1 (Fragment);WW domain binding protein 1;	WBP1;	tr|C9JLM6|C9JLM6_HUMAN WW domain binding protein 1 (Fragment) OS=Homo sapiens OX=9606 GN=WBP1 PE=1 SV=8;tr|B8ZZ95|B8ZZ95_HUMAN WW domain binding protein 1 OS=Homo sapiens OX=9606 GN=WBP1 PE=1 SV=1;tr|A0A384P602|A0A384P602_HUMAN Epididymis secretory sperm b	5	1	1	1	4	27.751	249	6.0922	0	9	0
H7C1P0	H7C1P0	Replication factor C subunit 4 (Fragment)	RFC4	tr|H7C1P0|H7C1P0_HUMAN Replication factor C subunit 4 (Fragment) OS=Homo sapiens OX=9606 GN=RFC4 PE=1 SV=1	1	1	1	1	5.4	11.849	111	6.0643	15720000	9	1746700
H7BZW0;M0QZV1;M0QZN4;X6RIU2;M0QWZ6;Q4G0U5	H7BZW0;M0QZV1;M0QZN4;X6RIU2;M0QWZ6;Q4G0U5	Cilia and flagella associated protein 221;	CFAP221;	tr|H7BZW0|H7BZW0_HUMAN Cilia and flagella associated protein 221 OS=Homo sapiens OX=9606 GN=CFAP221 PE=4 SV=2;tr|M0QZV1|M0QZV1_HUMAN Cilia and flagella associated protein 221 OS=Homo sapiens OX=9606 GN=CFAP221 PE=1 SV=1;tr|M0QZN4|M0QZN4_HUMAN Cilia and fla	6	1	1	1	17	5.9418	53	6.0522	0	3	0
P09848	P09848	Lactase/phlorizin hydrolase	LCT	sp|P09848|LPH_HUMAN Lactase/phlorizin hydrolase OS=Homo sapiens OX=9606 GN=LCT PE=1 SV=3	1	1	1	1	0.3	218.58	1927	5.9596	157960000	97	1628400
H0YID9	H0YID9	Protein Churchill (Fragment)	CHURC1	tr|H0YID9|H0YID9_HUMAN Protein Churchill (Fragment) OS=Homo sapiens OX=9606 GN=CHURC1 PE=3 SV=1	1	1	1	1	9.5	11.018	95	5.9386	0	5	0
Q71RD1	Q71RD1	PP11647		tr|Q71RD1|Q71RD1_HUMAN PP11647 OS=Homo sapiens OX=9606 PE=2 SV=1	1	1	1	1	7.3	15.537	151	5.9255	0	11	0
A0AAQ5BIK4;A0A669KAW8;A0A669KBC5;Q8N2C7	A0AAQ5BIK4;A0A669KAW8;A0A669KBC5;Q8N2C7	Unc-80 homolog, NALCN channel complex subunit;	UNC80;	tr|A0AAQ5BIK4|A0AAQ5BIK4_HUMAN Unc-80 homolog, NALCN channel complex subunit OS=Homo sapiens OX=9606 GN=UNC80 PE=1 SV=1;tr|A0A669KAW8|A0A669KAW8_HUMAN Unc-80 homolog, NALCN channel complex subunit OS=Homo sapiens OX=9606 GN=UNC80 PE=1 SV=1;tr|A0A669KBC5|A0	4	1	1	1	0.9	141.84	1284	5.9255	0	77	0
H0YFB4	H0YFB4	Inositol polyphosphate phosphatase like 1 (Fragment)	INPPL1	tr|H0YFB4|H0YFB4_HUMAN Inositol polyphosphate phosphatase like 1 (Fragment) OS=Homo sapiens OX=9606 GN=INPPL1 PE=4 SV=1	1	1	1	1	26.8	4.4181	41	5.9255	0	2	0
A0A7S5C1C9	A0A7S5C1C9	IGH c1294_heavy_IGHV2-70_IGHD3-22_IGHJ3 (Fragment)		tr|A0A7S5C1C9|A0A7S5C1C9_HUMAN IGH c1294_heavy_IGHV2-70_IGHD3-22_IGHJ3 (Fragment) OS=Homo sapiens OX=9606 PE=2 SV=1	1	1	1	1	8.7	14.112	127	5.9255	0	6	0
Q59ET2;A0A6I8PRB8;A0A6I8PL17;A8K169;Q16827	Q59ET2;A0A6I8PRB8;A0A6I8PL17;A8K169;Q16827	Receptor-type protein tyrosine phosphatase O isoform a variant (Fragment);Protein tyrosine phosphatase receptor type O;	;PTPRO	tr|Q59ET2|Q59ET2_HUMAN Receptor-type protein tyrosine phosphatase O isoform a variant (Fragment) OS=Homo sapiens OX=9606 PE=2 SV=1;tr|A0A6I8PRB8|A0A6I8PRB8_HUMAN Protein tyrosine phosphatase receptor type O OS=Homo sapiens OX=9606 GN=PTPRO PE=1 SV=1;tr|A0A	5	1	1	1	3	83.661	743	5.9171	69845000	34	2054300
C9JWJ3;C9J9Y4;C9IZL6;C9J0E2;C9J480;A0A087WXB8;Q9Y274	C9JWJ3;C9J9Y4;C9IZL6;C9J0E2;C9J480;A0A087WXB8;Q9Y274	ST3 beta-galactoside alpha-2,3-sialyltransferase 6 (Fragment)	ST3GAL6	tr|C9JWJ3|C9JWJ3_HUMAN ST3 beta-galactoside alpha-2,3-sialyltransferase 6 (Fragment) OS=Homo sapiens OX=9606 GN=ST3GAL6 PE=1 SV=1;tr|C9J9Y4|C9J9Y4_HUMAN ST3 beta-galactoside alpha-2,3-sialyltransferase 6 (Fragment) OS=Homo sapiens OX=9606 GN=ST3GAL6 PE=1 S	7	1	1	1	10.2	18.118	157	5.9047	8578200000	11	779840000
A0A7I2V449;A0A7I2V5R2;H0Y4F7;A0A7I2V3X0;A0A7I2V3B6;A0A7I2V397;A0A7I2V5C6;A0A7I2V5H2;A0A7I2YQX5;A0A7I2YQT2;B4DH07;Q5JRX3	A0A7I2V449;A0A7I2V5R2;H0Y4F7;A0A7I2V3X0;A0A7I2V3B6;A0A7I2V397;A0A7I2V5C6;A0A7I2V5H2;A0A7I2YQX5;A0A7I2YQT2;B4DH07;Q5JRX3	Pitrilysin metallopeptidase 1;Pitrilysin metalloproteinase 1;	PITRM1;	tr|A0A7I2V449|A0A7I2V449_HUMAN Pitrilysin metallopeptidase 1 OS=Homo sapiens OX=9606 GN=PITRM1 PE=1 SV=1;tr|A0A7I2V5R2|A0A7I2V5R2_HUMAN Pitrilysin metalloproteinase 1 OS=Homo sapiens OX=9606 GN=PITRM1 PE=1 SV=1;tr|H0Y4F7|H0Y4F7_HUMAN Pitrilysin metalloprot	12	1	1	1	5.2	35.674	308	5.8936	1721400000	19	90598000
Q9NVW2	Q9NVW2	E3 ubiquitin-protein ligase RLIM	RLIM	sp|Q9NVW2|RNF12_HUMAN E3 ubiquitin-protein ligase RLIM OS=Homo sapiens OX=9606 GN=RLIM PE=1 SV=3	1	1	1	1	2.6	68.548	624	5.8902	1503500000	33	45561000
M0QX95;M0R0A8;M0QZV9;Q8N894;M0QXK3;M0R0E0;B4DT44;Q86XR2	M0QX95;M0R0A8;M0QZV9;Q8N894;M0QXK3;M0R0E0;B4DT44;Q86XR2	Niban apoptosis regulator 3	NIBAN3;	tr|M0QX95|M0QX95_HUMAN Niban apoptosis regulator 3 OS=Homo sapiens OX=9606 GN=NIBAN3 PE=1 SV=1;tr|M0R0A8|M0R0A8_HUMAN Niban apoptosis regulator 3 OS=Homo sapiens OX=9606 GN=NIBAN3 PE=1 SV=1;tr|M0QZV9|M0QZV9_HUMAN Niban apoptosis regulator 3 OS=Homo sapiens	8	1	1	1	3.7	63.129	562	5.886	149040000	32	4657600
Q86UL7	Q86UL7	Thromboxane-A synthase (Fragment)	TBXAS1	tr|Q86UL7|Q86UL7_HUMAN Thromboxane-A synthase (Fragment) OS=Homo sapiens OX=9606 GN=TBXAS1 PE=3 SV=1	1	1	1	1	5.1	35.602	311	5.883	3361700	18	186760
F8VRX9;F5H457;Q9NVM9	F8VRX9;F5H457;Q9NVM9	Integrator complex subunit 13 (Fragment);	INTS13;	tr|F8VRX9|F8VRX9_HUMAN Integrator complex subunit 13 (Fragment) OS=Homo sapiens OX=9606 GN=INTS13 PE=1 SV=1;tr|F5H457|F5H457_HUMAN Integrator complex subunit 13 (Fragment) OS=Homo sapiens OX=9606 GN=INTS13 PE=1 SV=1;sp|Q9NVM9|INT13_HUMAN Integrator complex	3	1	1	1	12.1	13.743	124	5.8561	894970000	9	99441000
A0A7P0T9X2;B4DR67;A0A7P0T8X9;A0A7P0TAL2;A0A7P0T901;A0A7P0T9B8;Q9HC03;Q9Y673	A0A7P0T9X2;B4DR67;A0A7P0T8X9;A0A7P0TAL2;A0A7P0T901;A0A7P0T9B8;Q9HC03;Q9Y673	ALG5 dolichyl-phosphate beta-glucosyltransferase;	ALG5;	tr|A0A7P0T9X2|A0A7P0T9X2_HUMAN ALG5 dolichyl-phosphate beta-glucosyltransferase OS=Homo sapiens OX=9606 GN=ALG5 PE=1 SV=1;tr|B4DR67|B4DR67_HUMAN ALG5 dolichyl-phosphate beta-glucosyltransferase OS=Homo sapiens OX=9606 GN=ALG5 PE=1 SV=1;tr|A0A7P0T8X9|A0A7P0	8	1	1	1	11.5	23.037	209	5.8544	233520000	12	19460000
P52333	P52333	Tyrosine-protein kinase JAK3	JAK3	sp|P52333|JAK3_HUMAN Tyrosine-protein kinase JAK3 OS=Homo sapiens OX=9606 GN=JAK3 PE=1 SV=2	1	1	1	1	2.2	125.1	1124	5.8381	32573000	71	458780
H0Y5E1;Q9BQK8	H0Y5E1;Q9BQK8	Lipin 3 (Fragment);Phosphatidate phosphatase LPIN3	LPIN3	tr|H0Y5E1|H0Y5E1_HUMAN Lipin 3 (Fragment) OS=Homo sapiens OX=9606 GN=LPIN3 PE=1 SV=8;sp|Q9BQK8|LPIN3_HUMAN Phosphatidate phosphatase LPIN3 OS=Homo sapiens OX=9606 GN=LPIN3 PE=1 SV=3	2	1	1	1	2.6	29.793	269	5.8361	26276000	15	1751800
A8K5H6	A8K5H6	Exonuclease 1		tr|A8K5H6|A8K5H6_HUMAN Exonuclease 1 OS=Homo sapiens OX=9606 PE=2 SV=1	1	1	1	1	2.2	93.899	845	5.8288	36175000	57	634640
A2VDJ1;Q9NYA3	A2VDJ1;Q9NYA3	GOLGA6 protein (Fragment);Golgin subfamily A member 6A	GOLGA6;GOLGA6A	tr|A2VDJ1|A2VDJ1_HUMAN GOLGA6 protein (Fragment) OS=Homo sapiens OX=9606 GN=GOLGA6 PE=2 SV=1;sp|Q9NYA3|GOG6A_HUMAN Golgin subfamily A member 6A OS=Homo sapiens OX=9606 GN=GOLGA6A PE=1 SV=3	2	1	1	1	1.1	73.596	632	5.8278	19711000	36	547530
L8ECP0	L8ECP0	Alternative protein SYT9	SYT9	tr|L8ECP0|L8ECP0_HUMAN Alternative protein SYT9 OS=Homo sapiens OX=9606 GN=SYT9 PE=4 SV=1	1	1	1	1	14	4.9417	43	5.8274	3843900	4	960980
A0A5C2GNA6	A0A5C2GNA6	IG c658_heavy_IGHV3-53_IGHD5-24_IGHJ4 (Fragment)		tr|A0A5C2GNA6|A0A5C2GNA6_HUMAN IG c658_heavy_IGHV3-53_IGHD5-24_IGHJ4 (Fragment) OS=Homo sapiens OX=9606 PE=2 SV=1	1	1	1	1	12.6	13.222	119	5.8239	4659100	7	665590
F5H4U1	F5H4U1	Mannose-6-phosphate receptor, cation dependent (Fragment)	M6PR	tr|F5H4U1|F5H4U1_HUMAN Mannose-6-phosphate receptor, cation dependent (Fragment) OS=Homo sapiens OX=9606 GN=M6PR PE=1 SV=1	1	1	1	1	64	2.9264	25	5.8188	39647000	1	39647000
A0A6I8PIU7;Q9H2A7	A0A6I8PIU7;Q9H2A7	C-X-C motif chemokine ligand 16;C-X-C motif chemokine 16	CXCL16	tr|A0A6I8PIU7|A0A6I8PIU7_HUMAN C-X-C motif chemokine ligand 16 OS=Homo sapiens OX=9606 GN=CXCL16 PE=1 SV=1;sp|Q9H2A7|CXL16_HUMAN C-X-C motif chemokine 16 OS=Homo sapiens OX=9606 GN=CXCL16 PE=1 SV=4	2	1	1	1	23.5	12.199	115	5.817	2849100	6	474860
