# Supplementary material
Source: Research Square preprint supplement (doi:10.21203/rs.3.rs-9321668/v1)

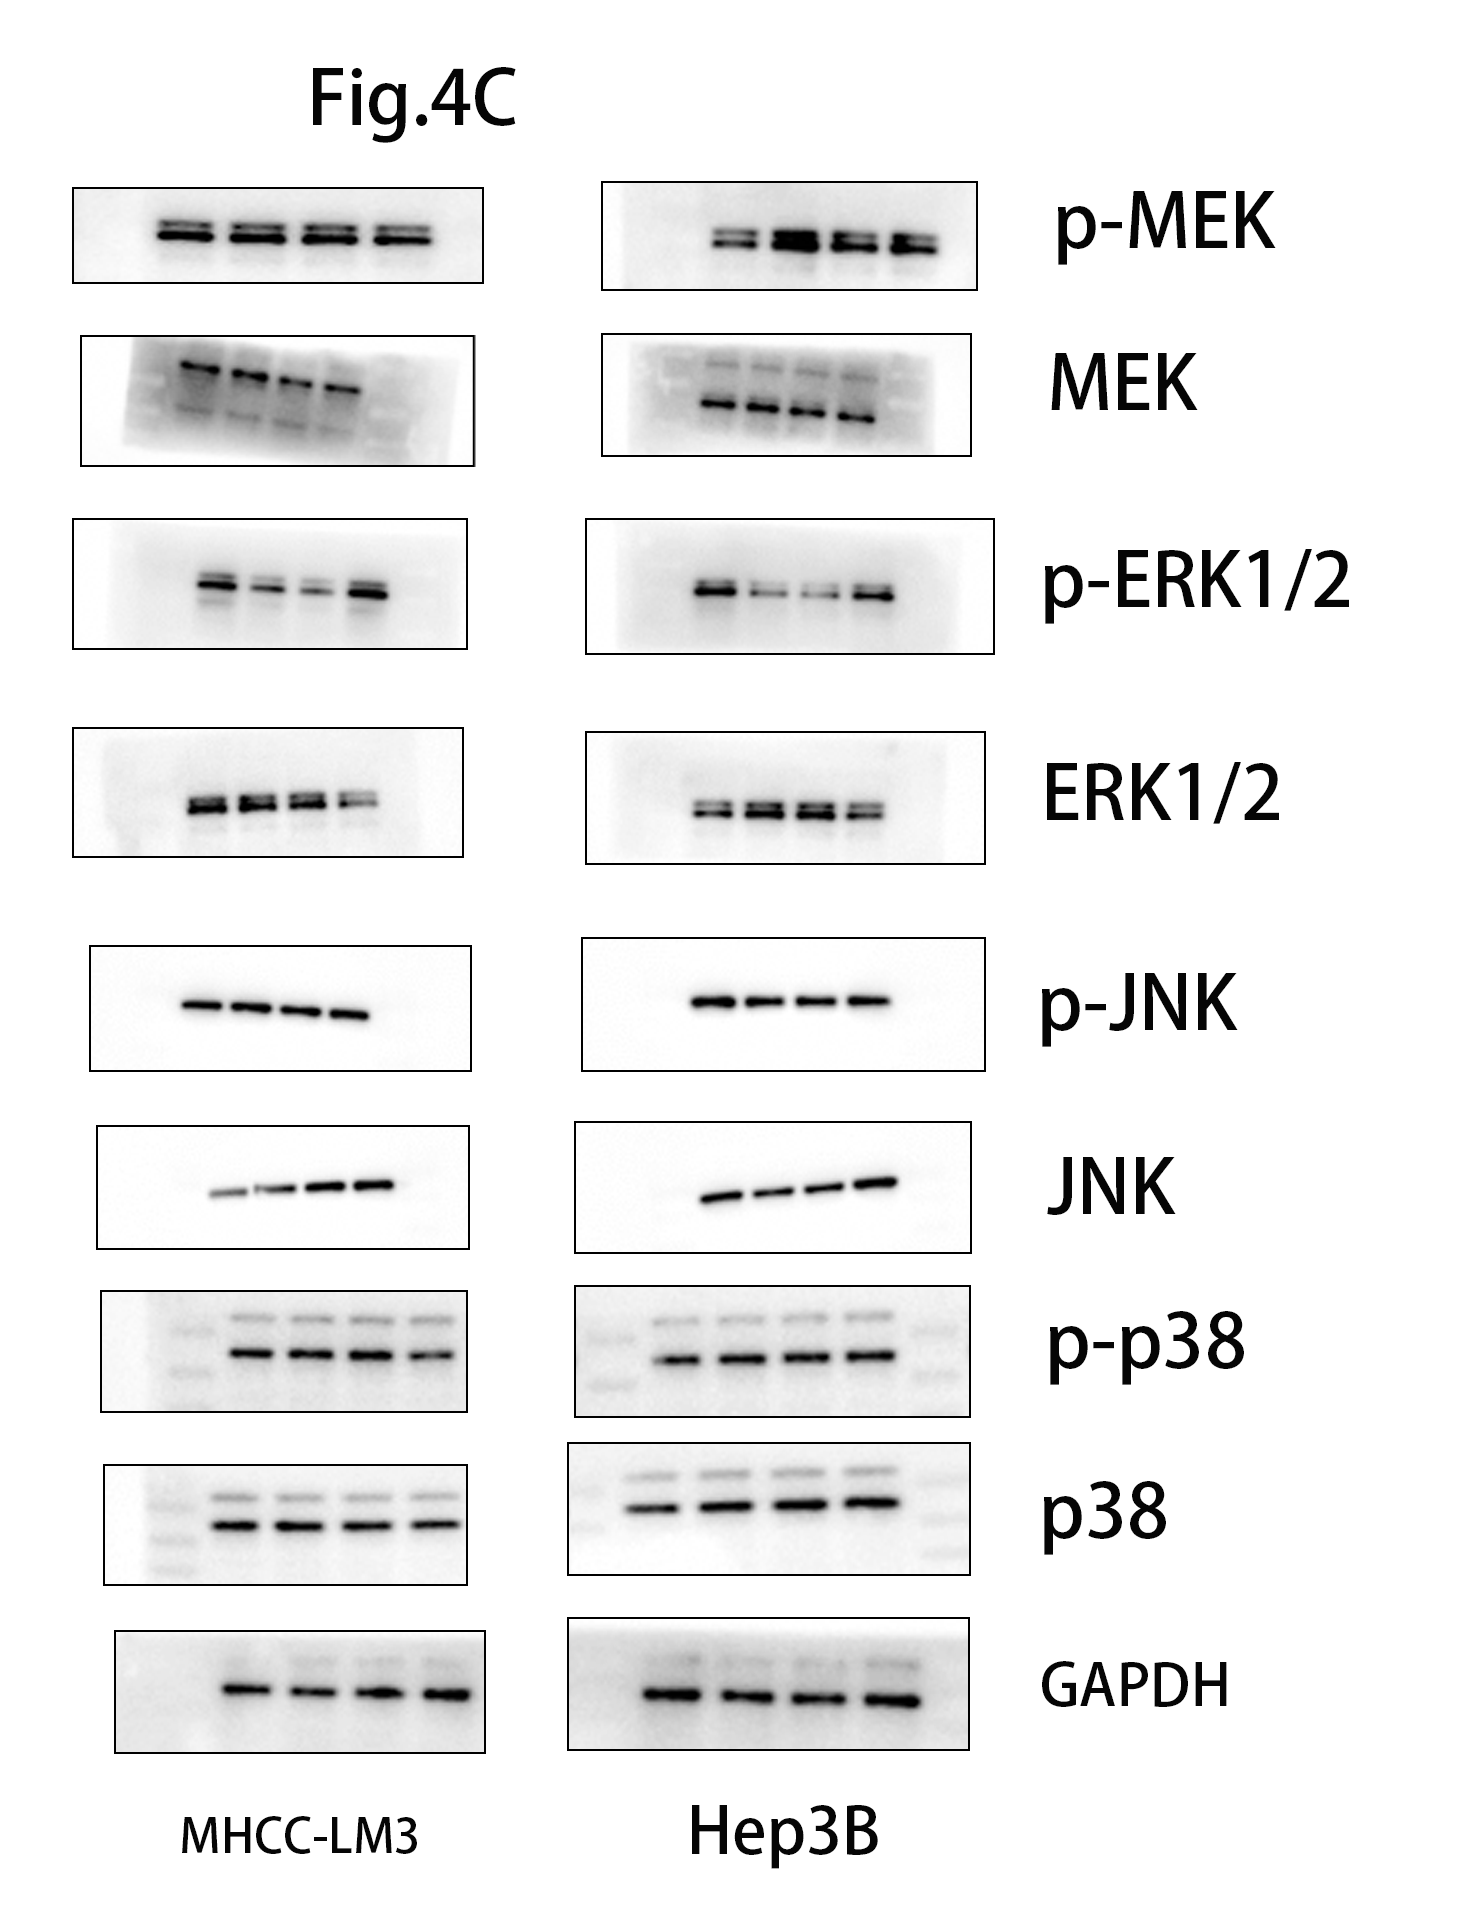


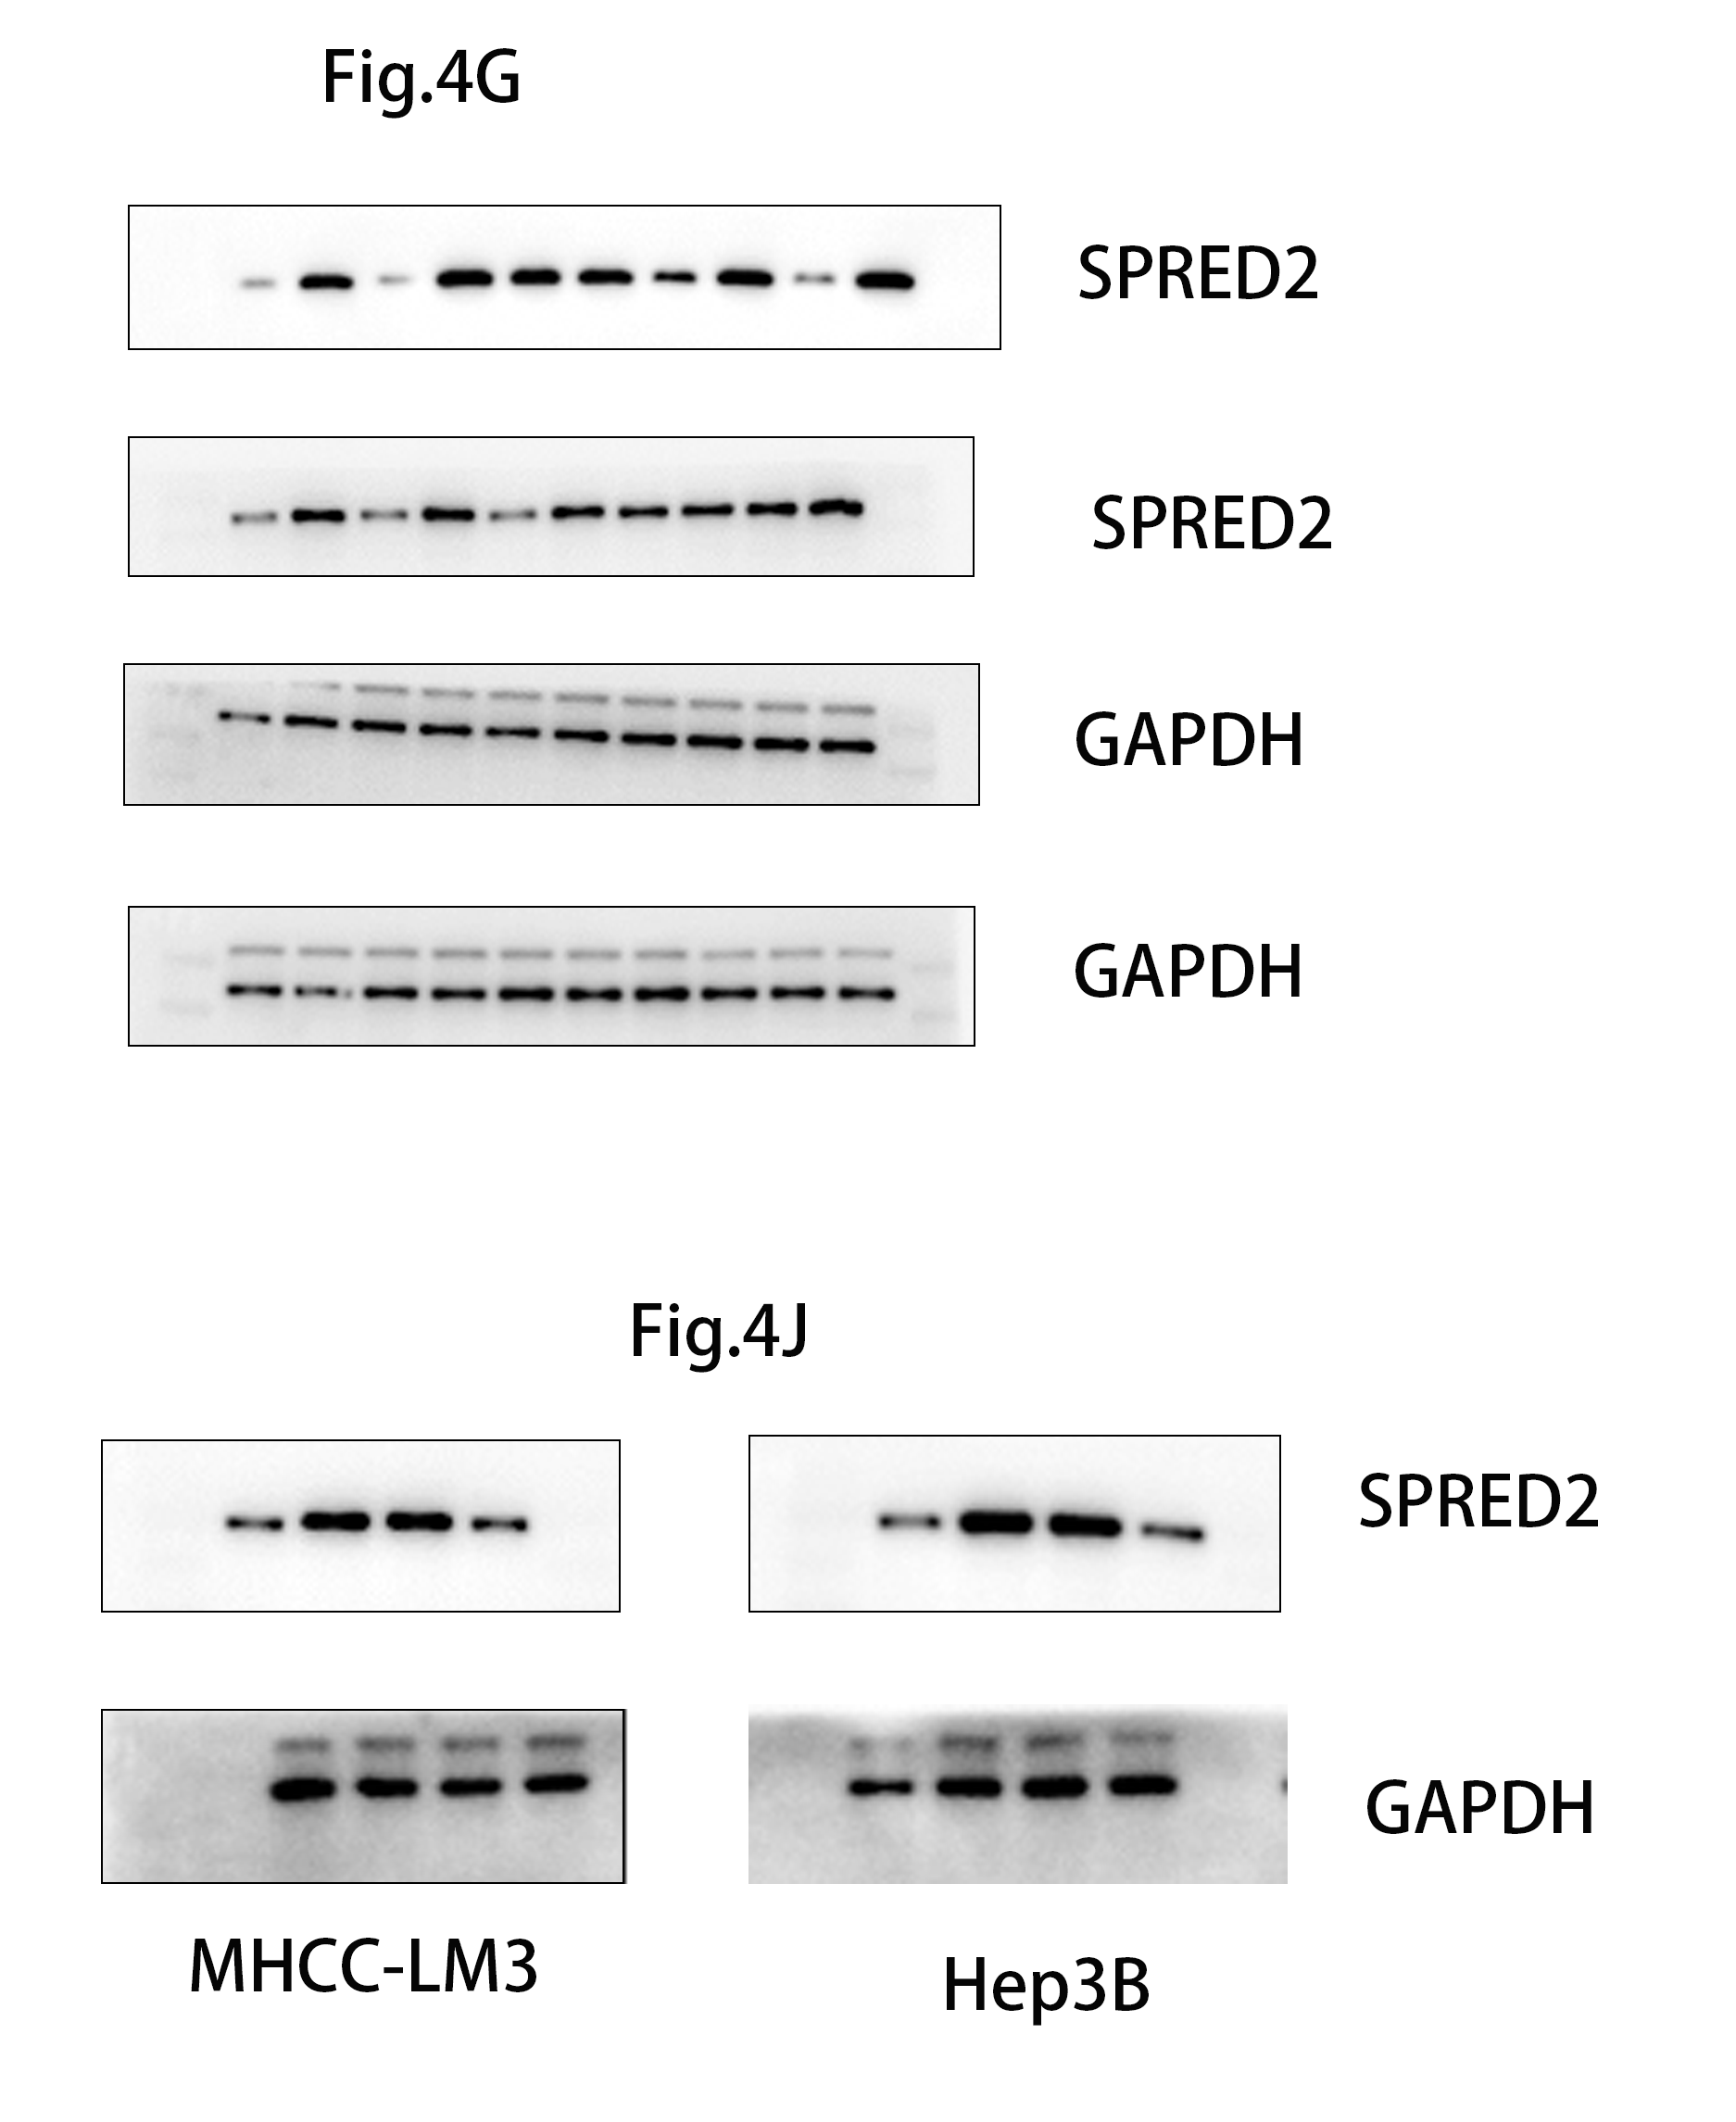


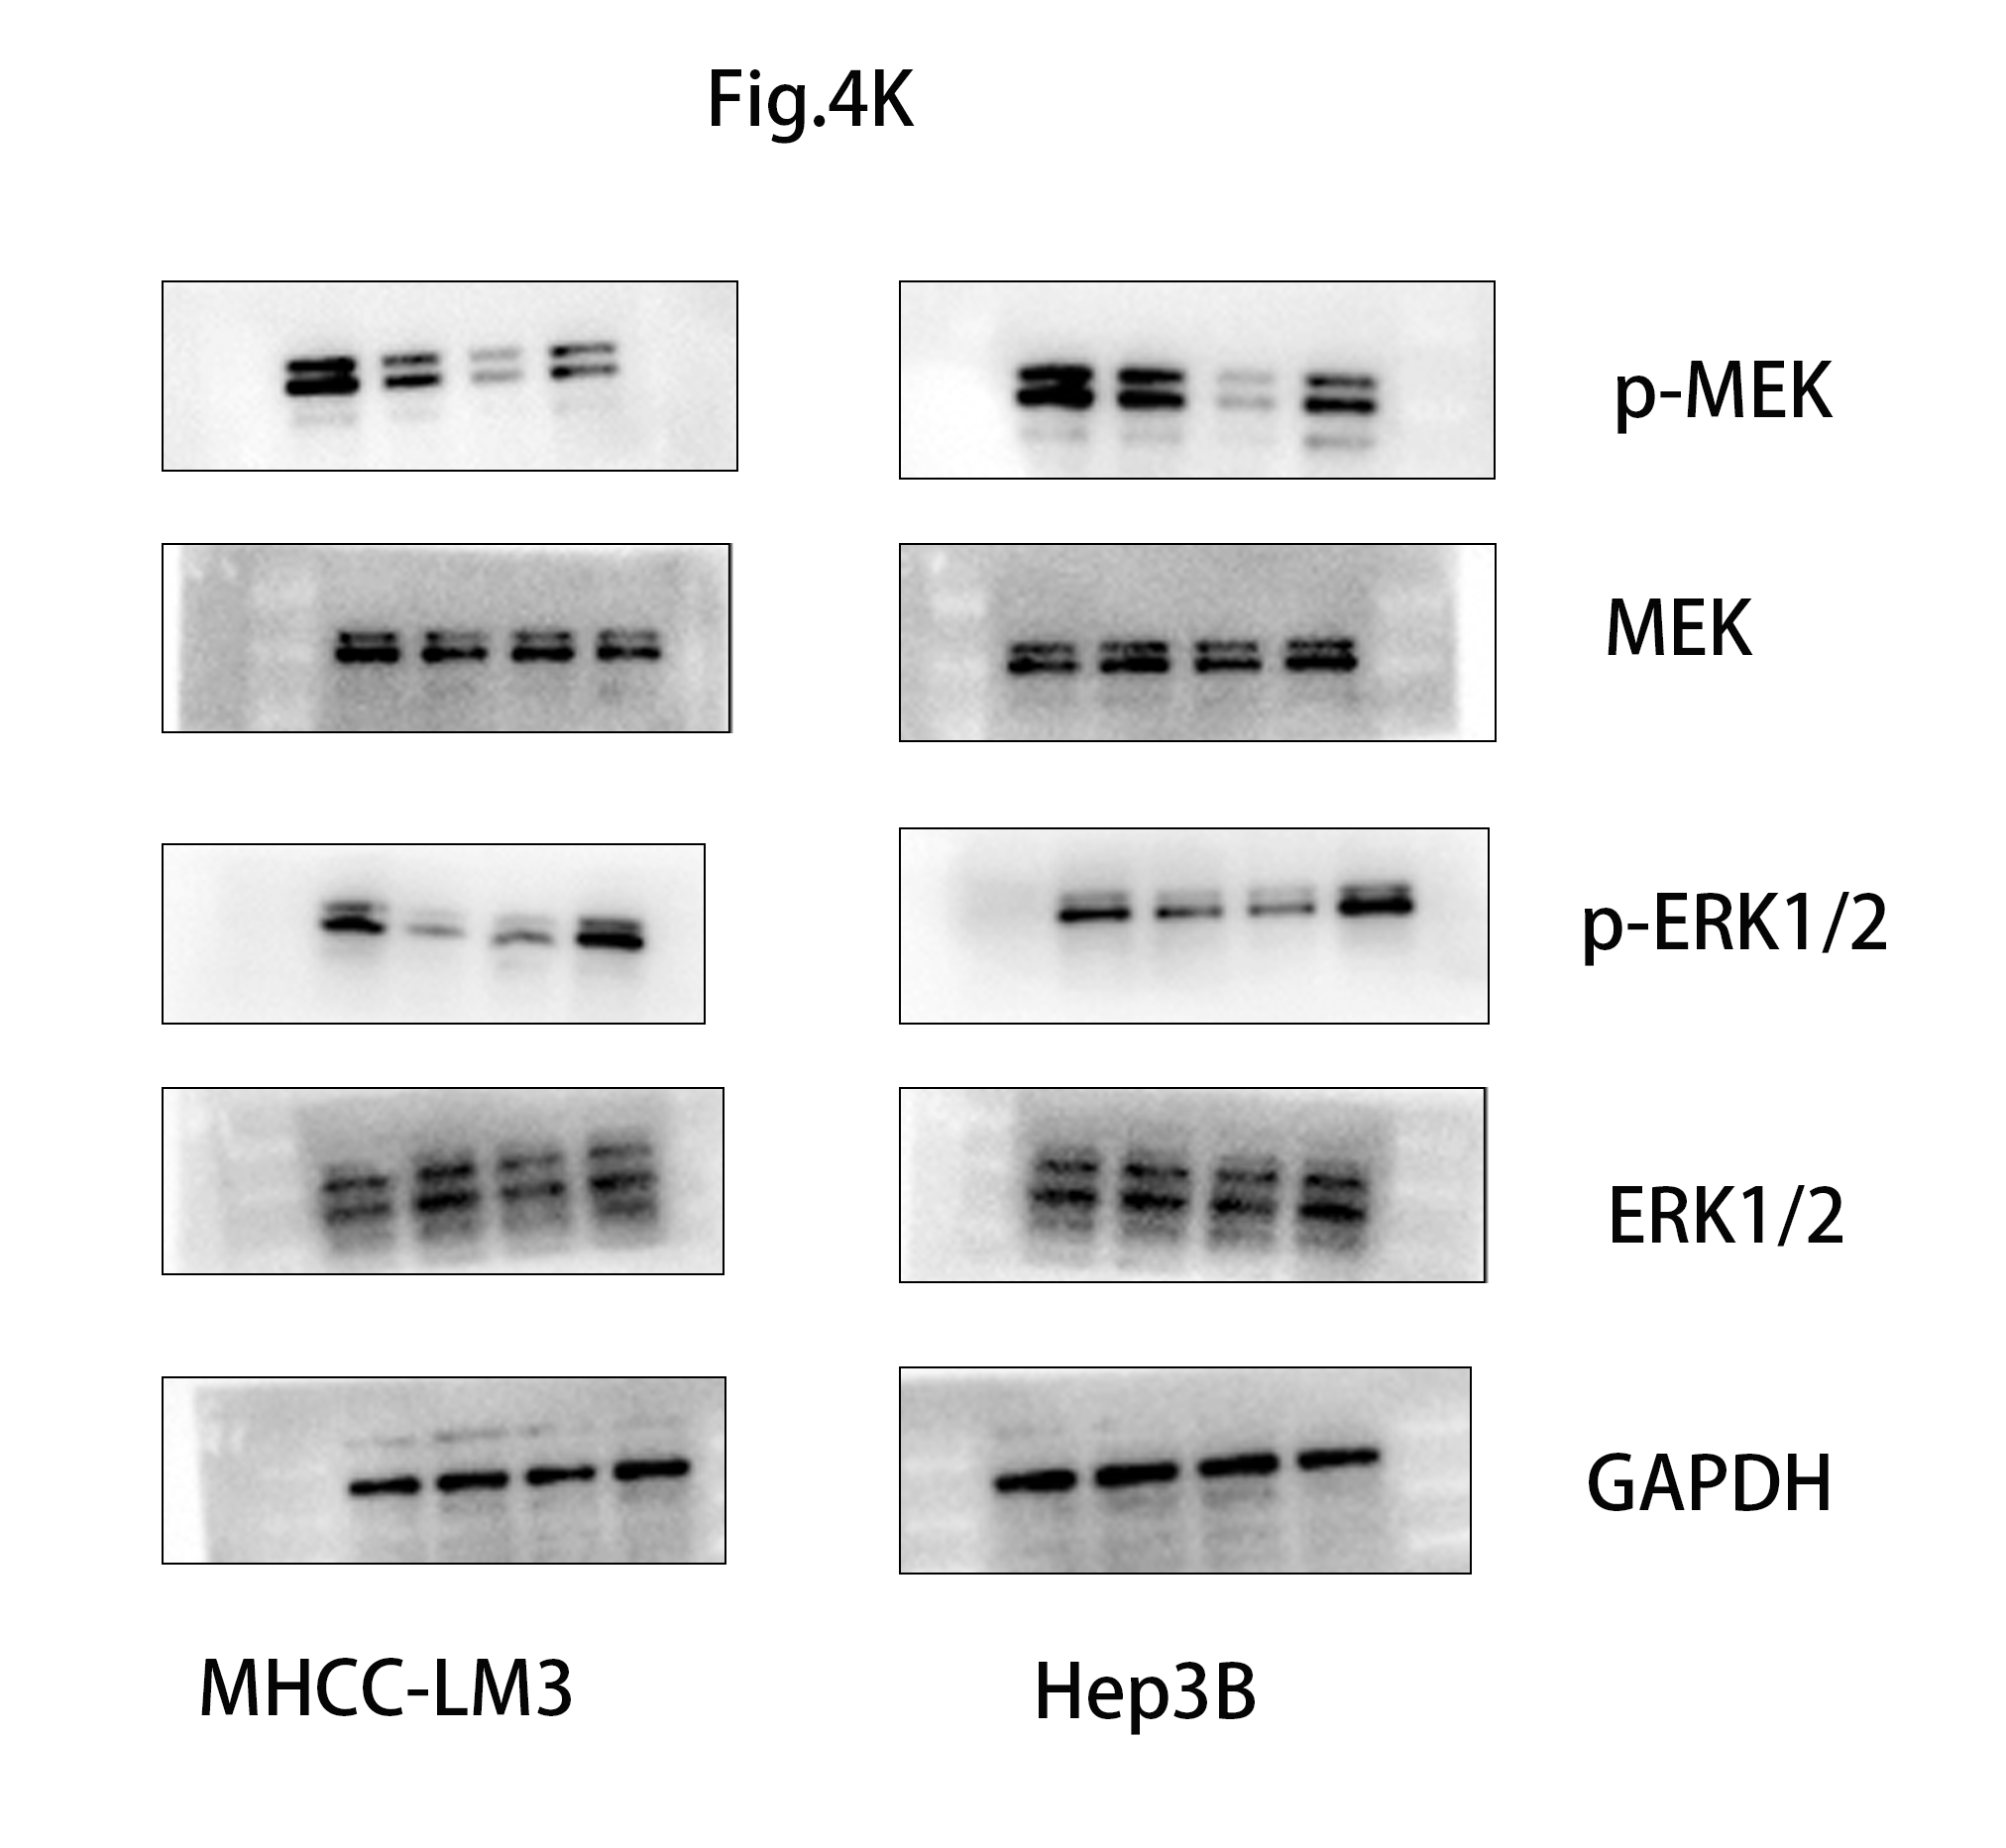


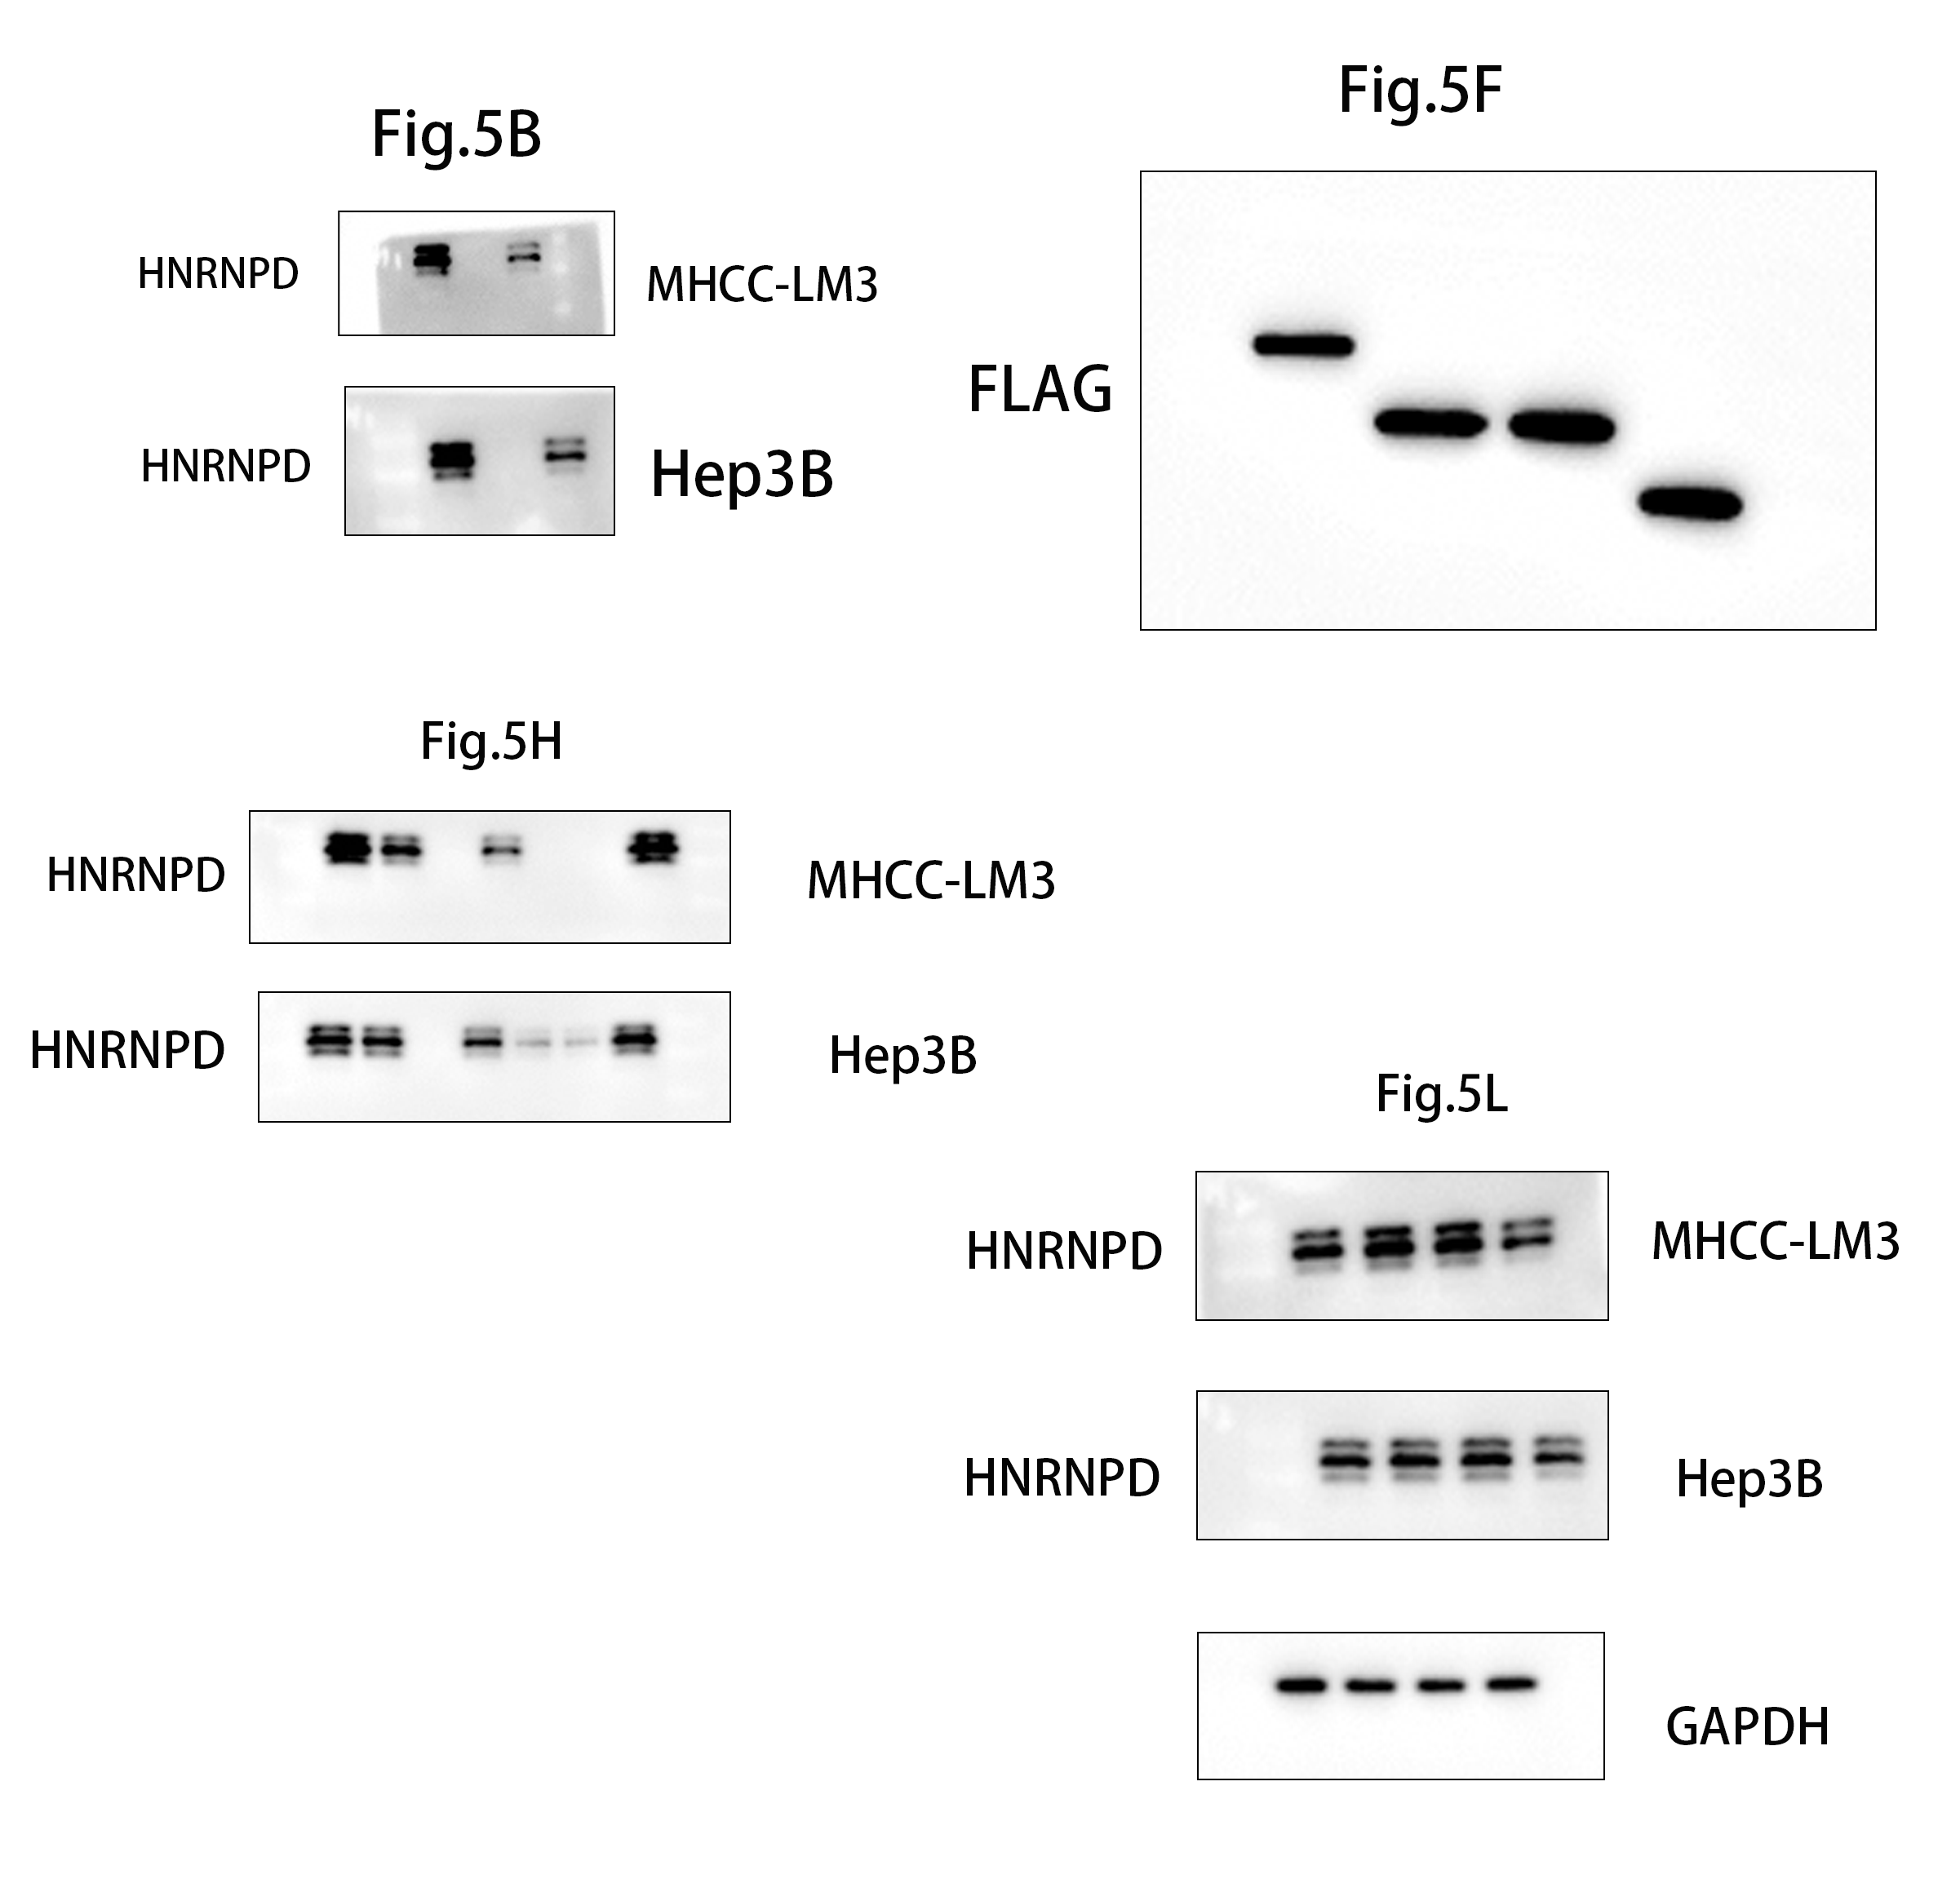


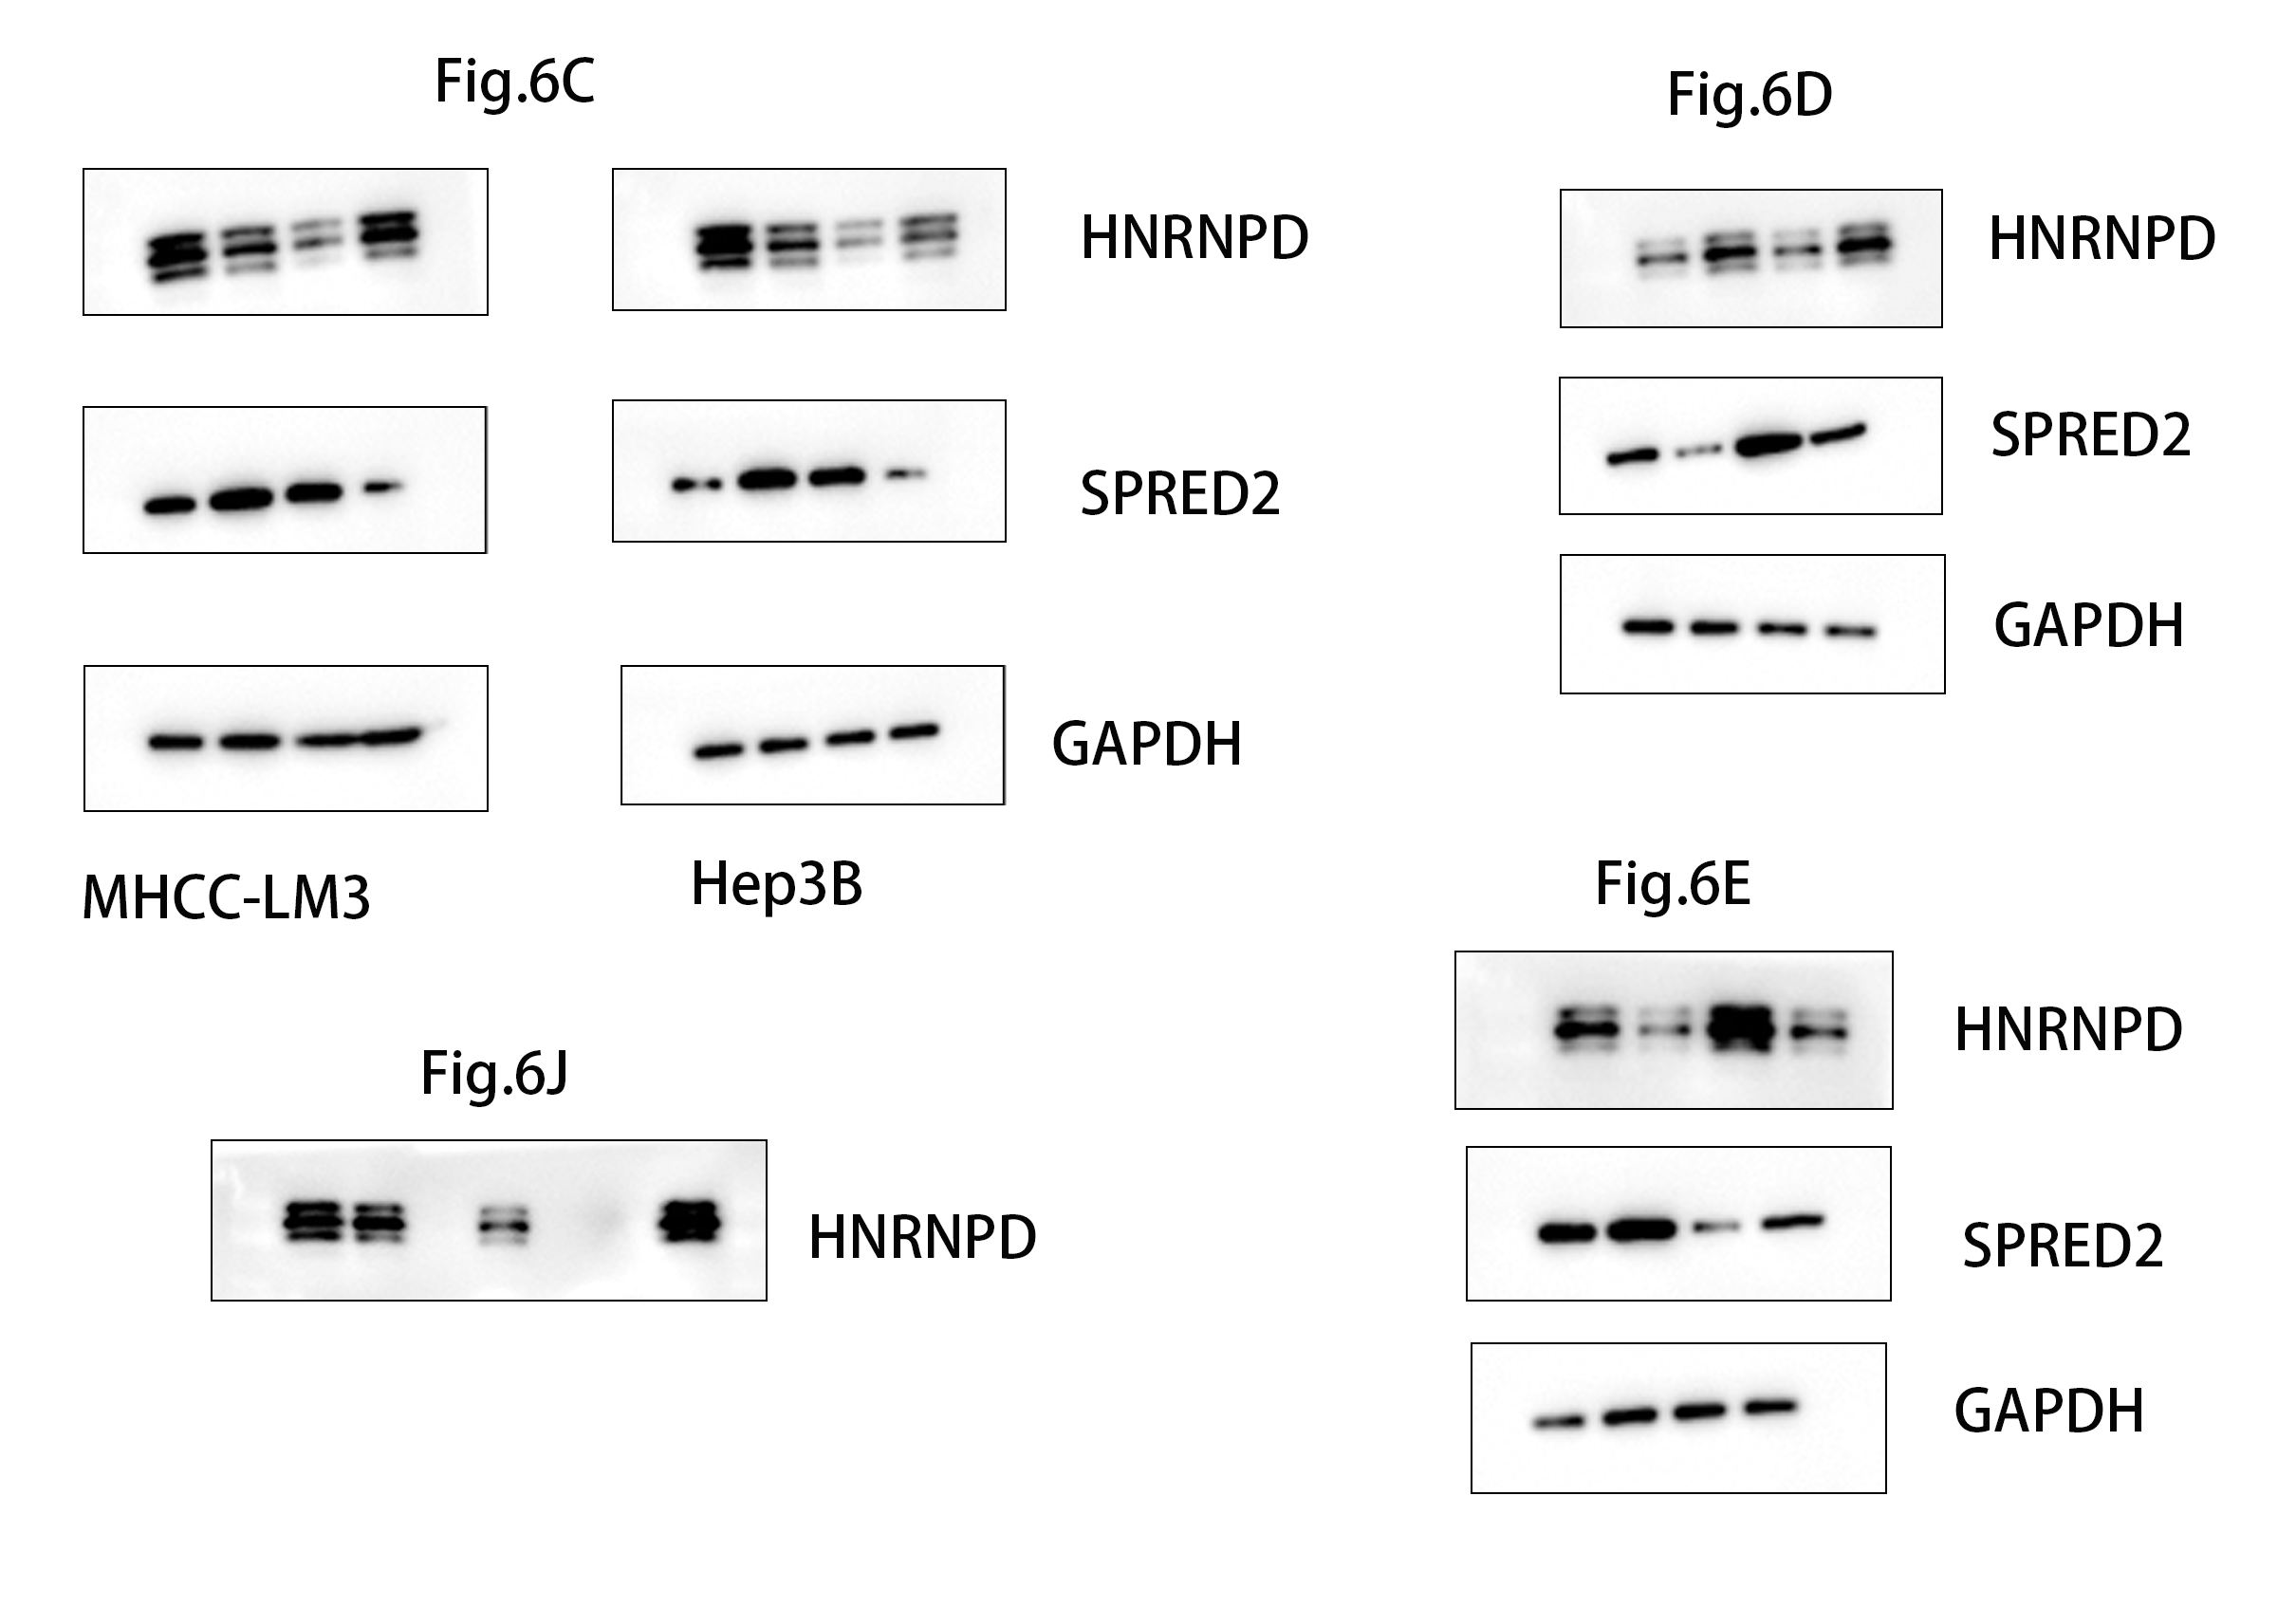


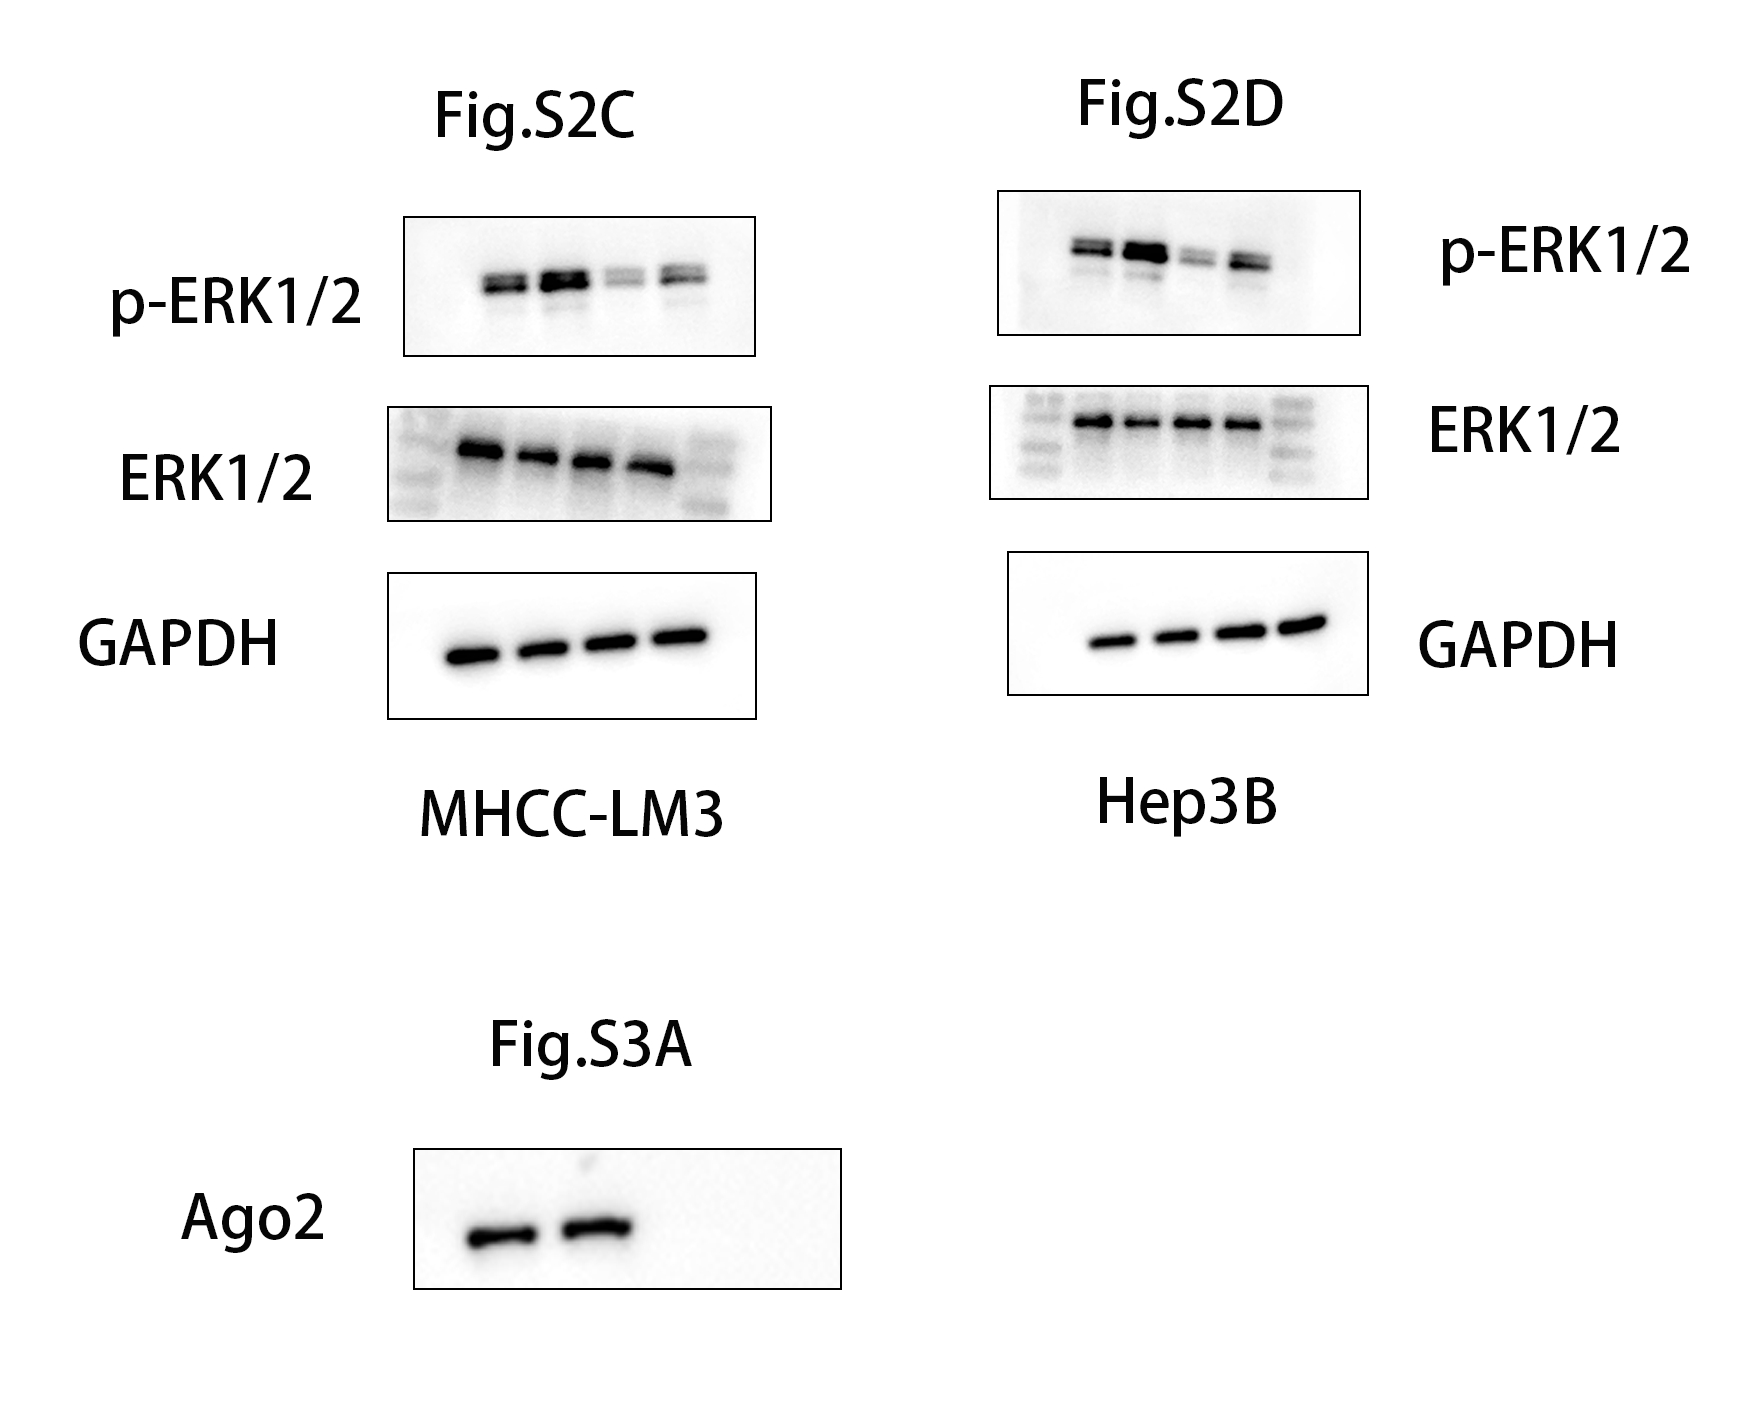

Supplement: Supplementary file 2 [file f20d7037eeb0b1f178ea9a8a.doc]
